# Supplementary material for: Inactivity of Peptidase ClpP Causes Primary Accumulation of Mitochondrial Disaggregase ClpX With Its Interactors at the Nucleoid and RNA Granule
Source: Preprints.org preprint supplement (doi:10.20944/preprints202111.0066.v1), 2021-11-03
Supplement: Supplementary file 1 [file supplementary]

## Sheet: Tabelle1
Gene names	Majority protein IDs	Protein names	Peptides	Sequence coverage [%]	Mol. weight [kDa]	Score	-Log p-value t-test PRLTS3 / Control	Fold change PRLTS3 / Control [log2]	LFQ [log2] 0006_I	LFQ [log2] 0006_II	LFQ [log2] 0006_III	LFQ [log2] 58955_I	LFQ [log2] 58955_II	LFQ [log2] 58955_III	LFQ [log2] C02261	LFQ [log2] C06858	LFQ [log2] C101	LFQ [log2] C128	LFQ [log2] C329	LFQ [log2] C330	LFQ [log2] C6103	Gene ontology (biological process)	Gene ontology (cellular component)	Gene ontology (molecular function)	Gene ontology IDs
IGF2BP3	O00425	Insulin-like growth factor 2 mRNA-binding protein 3	13	28.3	63.704	195.69	3.71214	4.30431	27.3816	27.3673	26.7196	27.1451	27.6937	27.2801	21.2363	21.9706	NaN	NaN	24.5552	21.9632	25.0761	anatomical structure morphogenesis [GO:0009653];mRNA transport [GO:0051028];negative regulation of translation [GO:0017148];regulation of cytokine biosynthetic process [GO:0042035];regulation of mRNA stability [GO:0043488];translation [GO:0006412]	cytoplasm [GO:0005737];cytosol [GO:0005829];nucleus [GO:0005634]	mRNA 3'-UTR binding [GO:0003730];mRNA 5'-UTR binding [GO:0048027];RNA binding [GO:0003723];translation regulator activity [GO:0045182]	GO:0003723;GO:0003730;GO:0005634;GO:0005737;GO:0005829;GO:0006412;GO:0009653;GO:0017148;GO:0042035;GO:0043488;GO:0045182;GO:0048027;GO:0051028
KCTD12	Q96CX2	BTB/POZ domain-containing protein KCTD12	10	42.5	35.7	163.01	4.19015	2.74115	28.1054	28.0405	28.204	27.3459	27.4624	27.8846	24.9092	23.6171	25.1607	24.8821	25.9707	26.7505	24.405	protein homooligomerization [GO:0051260]	cell junction [GO:0030054];postsynaptic membrane [GO:0045211];presynaptic membrane [GO:0042734]	identical protein binding [GO:0042802];RNA binding [GO:0003723]	GO:0003723;GO:0030054;GO:0042734;GO:0042802;GO:0045211;GO:0051260
SVIL	O95425	Supervillin	25	15.5	247.74	323.31	3.57438	2.64715	23.9062	25.1815	24.8537	25.8694	25.7512	25.742	NaN	21.6408	22.6597	23.3176	NaN	21.9539	23.279	cytoskeleton organization [GO:0007010];positive regulation of cytokinesis [GO:0032467];skeletal muscle tissue development [GO:0007519]	actin cytoskeleton [GO:0015629];cleavage furrow [GO:0032154];costamere [GO:0043034];cytoplasm [GO:0005737];cytosol [GO:0005829];focal adhesion [GO:0005925];invadopodium [GO:0071437];microtubule minus-end [GO:0036449];midbody [GO:0030496];nucleus [GO:0005634];plasma membrane [GO:0005886];podosome [GO:0002102]	actin filament binding [GO:0051015]	GO:0002102;GO:0005634;GO:0005737;GO:0005829;GO:0005886;GO:0005925;GO:0007010;GO:0007519;GO:0015629;GO:0030496;GO:0032154;GO:0032467;GO:0036449;GO:0043034;GO:0051015;GO:0071437
HSPA2	P54652	Heat shock-related 70 kDa protein 2	24	42.3	70.02	244.82	3.94124	2.47114	28.4394	28.5808	28.3666	27.351	27.4373	27.0719	26.4118	26.1455	25.5718	24.6468	25.0469	24.1061	25.8946	cellular response to heat [GO:0034605];cellular response to unfolded protein [GO:0034620];chaperone cofactor-dependent protein refolding [GO:0051085];male meiosis I [GO:0007141];male meiotic nuclear division [GO:0007140];negative regulation of inclusion body assembly [GO:0090084];positive regulation of ATPase activity [GO:0032781];positive regulation of ATPase-coupled calcium transmembrane transp…	blood microparticle [GO:0072562];CatSper complex [GO:0036128];cell surface [GO:0009986];cytoplasm [GO:0005737];cytosol [GO:0005829];extracellular exosome [GO:0070062];male germ cell nucleus [GO:0001673];meiotic spindle [GO:0072687];membrane [GO:0016020];nucleus [GO:0005634];plasma membrane [GO:0005886];synaptonemal complex [GO:0000795]	ATPase activity [GO:0016887];ATPase activity, coupled [GO:0042623];ATP binding [GO:0005524];chaperone binding [GO:0051087];disordered domain specific binding [GO:0097718];enzyme binding [GO:0019899];glycolipid binding [GO:0051861];heat shock protein binding [GO:0031072];misfolded protein binding [GO:0051787];protein folding chaperone [GO:0044183];tau protein binding [GO:0048156];unfolded protein …	GO:0000795;GO:0001673;GO:0001934;GO:0005524;GO:0005634;GO:0005737;GO:0005829;GO:0005886;GO:0006986;GO:0007140;GO:0007141;GO:0007283;GO:0007286;GO:0009408;GO:0009409;GO:0009986;GO:0010971;GO:0016020;GO:0016192;GO:0016887;GO:0019899;GO:0031072;GO:0032781;GO:0034605;GO:0034620;GO:0036128;GO:0042026;GO:0042623;GO:0044183;GO:0048156;GO:0051082;GO:0051085;GO:0051087;GO:0051787;GO:0051861;GO:0070062;GO:…
MARCKSL1	P49006	MARCKS-related protein	4	51.3	19.529	253.33	6.15558	2.43364	26.6978	26.8841	27.1258	27.3585	27.1195	26.6153	24.3732	24.1831	24.2833	24.1137	NaN	25.1215	25.1244	positive regulation of cell population proliferation [GO:0008284]	cytoplasm [GO:0005737];cytoskeleton [GO:0005856];extracellular exosome [GO:0070062];plasma membrane [GO:0005886]	actin binding [GO:0003779];calmodulin binding [GO:0005516]	GO:0003779;GO:0005516;GO:0005737;GO:0005856;GO:0005886;GO:0008284;GO:0070062
AKAP12	Q02952	A-kinase anchor protein 12	81	62.9	191.48	323.31	3.8376	2.204	29.8858	29.9574	30.0865	29.3219	29.3989	29.0619	26.3463	27.6481	27.3368	27.026	26.531	28.5505	28.4645	adenylate cyclase-inhibiting G protein-coupled receptor signaling pathway [GO:0007193];cellular response to interleukin-1 [GO:0071347];cellular response to tumor necrosis factor [GO:0071356];G protein-coupled receptor signaling pathway [GO:0007186];hepatic stellate cell activation [GO:0035733];modulation of chemical synaptic transmission [GO:0050804];negative regulation of vascular permeability […	cell cortex [GO:0005938];cytoplasm [GO:0005737];cytoskeleton [GO:0005856];cytosol [GO:0005829];focal adhesion [GO:0005925];neuronal cell body [GO:0043025];plasma membrane [GO:0005886];Schaffer collateral - CA1 synapse [GO:0098685]	adenylate cyclase binding [GO:0008179];calmodulin binding [GO:0005516];protein kinase A binding [GO:0051018]	GO:0005516;GO:0005737;GO:0005829;GO:0005856;GO:0005886;GO:0005925;GO:0005938;GO:0006605;GO:0007186;GO:0007193;GO:0008179;GO:0010738;GO:0010739;GO:0032496;GO:0035733;GO:0042535;GO:0043025;GO:0043116;GO:0050804;GO:0051018;GO:0051602;GO:0051770;GO:0061870;GO:0070374;GO:0071347;GO:0071356;GO:0090036;GO:0098685;GO:1900143;GO:1904469
VIM	P08670	Vimentin	40	75.3	53.651	323.31	4.43219	2.1309	31.6305	31.4651	31.5446	33.1571	32.9681	32.5607	30.458	30.0477	29.6675	30.1015	30.3231	30.4407	29.5924	astrocyte development [GO:0014002];Bergmann glial cell differentiation [GO:0060020];cellular response to interferon-gamma [GO:0071346];cellular response to lipopolysaccharide [GO:0071222];cellular response to muramyl dipeptide [GO:0071225];cytokine-mediated signaling pathway [GO:0019221];intermediate filament organization [GO:0045109];lens fiber cell development [GO:0070307];muscle filament slidi…	cell leading edge [GO:0031252];cytoplasm [GO:0005737];cytoskeleton [GO:0005856];cytosol [GO:0005829];extracellular exosome [GO:0070062];focal adhesion [GO:0005925];intermediate filament [GO:0005882];neuron projection [GO:0043005];nuclear matrix [GO:0016363];peroxisome [GO:0005777];phagocytic vesicle [GO:0045335];plasma membrane [GO:0005886];polysome [GO:0005844];ribonucleoprotein complex [GO:1990…	double-stranded RNA binding [GO:0003725];identical protein binding [GO:0042802];keratin filament binding [GO:1990254];protein domain specific binding [GO:0019904];scaffold protein binding [GO:0097110];structural constituent of cytoskeleton [GO:0005200];structural constituent of eye lens [GO:0005212]	GO:0003725;GO:0005200;GO:0005212;GO:0005737;GO:0005777;GO:0005829;GO:0005844;GO:0005856;GO:0005882;GO:0005886;GO:0005925;GO:0010977;GO:0014002;GO:0016032;GO:0016363;GO:0019221;GO:0019904;GO:0030049;GO:0031252;GO:0032967;GO:0042802;GO:0043005;GO:0043488;GO:0045109;GO:0045335;GO:0045727;GO:0060020;GO:0060395;GO:0070062;GO:0070307;GO:0071222;GO:0071225;GO:0071346;GO:0097110;GO:1990254;GO:1990904
CSPG4	Q6UVK1	Chondroitin sulfate proteoglycan 4	23	15.3	250.53	232.53	2.7384	2.01357	25.8544	25.4811	25.7489	27.2279	27.1753	27.0507	25.7153	24.2819	23.2807	25.3494	24.5301	23.1905	24.5186	activation of MAPK activity [GO:0000187];angiogenesis [GO:0001525];cell population proliferation [GO:0008283];chondroitin sulfate biosynthetic process [GO:0030206];chondroitin sulfate catabolic process [GO:0030207];dermatan sulfate biosynthetic process [GO:0030208];glial cell migration [GO:0008347];intracellular signal transduction [GO:0035556];positive regulation of peptidyl-tyrosine phosphoryla…	apical plasma membrane [GO:0016324];cell surface [GO:0009986];collagen-containing extracellular matrix [GO:0062023];extracellular exosome [GO:0070062];extracellular region [GO:0005576];focal adhesion [GO:0005925];Golgi lumen [GO:0005796];integral component of plasma membrane [GO:0005887];lamellipodium membrane [GO:0031258];lysosomal lumen [GO:0043202]	protein kinase binding [GO:0019901]	GO:0000187;GO:0001525;GO:0005576;GO:0005796;GO:0005887;GO:0005925;GO:0007169;GO:0008283;GO:0008347;GO:0009986;GO:0016324;GO:0019901;GO:0030206;GO:0030207;GO:0030208;GO:0031258;GO:0035556;GO:0043202;GO:0048771;GO:0050731;GO:0062023;GO:0070062
TGFBR3	Q03167	Transforming growth factor beta receptor type 3	6	10.6	93.498	20.827	2.30644	2.002	23.7097	23.8552	24.0763	26.2744	24.7427	25.0222	NaN	NaN	22.7305	22.6985	NaN	23.0325	21.9842	animal organ regeneration [GO:0031100];BMP signaling pathway [GO:0030509];cardiac epithelial to mesenchymal transition [GO:0060317];cardiac muscle cell proliferation [GO:0060038];cell migration [GO:0016477];definitive erythrocyte differentiation [GO:0060318];definitive hemopoiesis [GO:0060216];epicardium-derived cardiac fibroblast cell development [GO:0060939];epithelial to mesenchymal transition…	cell surface [GO:0009986];cytoplasm [GO:0005737];external side of plasma membrane [GO:0009897];extracellular exosome [GO:0070062];extracellular matrix [GO:0031012];extracellular space [GO:0005615];inhibin-betaglycan-ActRII complex [GO:0034673];integral component of plasma membrane [GO:0005887];receptor complex [GO:0043235]	activin binding [GO:0048185];coreceptor activity [GO:0015026];fibroblast growth factor binding [GO:0017134];glycosaminoglycan binding [GO:0005539];heparin binding [GO:0008201];PDZ domain binding [GO:0030165];SMAD binding [GO:0046332];transforming growth factor beta-activated receptor activity [GO:0005024];transforming growth factor beta binding [GO:0050431];transforming growth factor beta recepto…	GO:0001666;GO:0001837;GO:0001889;GO:0003007;GO:0003150;GO:0003151;GO:0003223;GO:0005024;GO:0005114;GO:0005160;GO:0005539;GO:0005615;GO:0005737;GO:0005887;GO:0006955;GO:0007179;GO:0007181;GO:0008201;GO:0009897;GO:0009986;GO:0015026;GO:0016477;GO:0017134;GO:0030165;GO:0030509;GO:0030511;GO:0030512;GO:0031012;GO:0031100;GO:0032354;GO:0034673;GO:0034695;GO:0034699;GO:0035556;GO:0043235;GO:0043393;GO:…
CYP1B1	Q16678	Cytochrome P450 1B1	9	17.1	60.845	38.265	3.93462	1.99483	25.6337	25.6862	25.6746	26.5711	26.3055	26.5566	23.4509	23.7315	25.5603	23.6821	23.8907	24.4539	23.7661	angiogenesis [GO:0001525];arachidonic acid metabolic process [GO:0019369];blood vessel morphogenesis [GO:0048514];cell adhesion [GO:0007155];cellular aromatic compound metabolic process [GO:0006725];cellular response to hydrogen peroxide [GO:0070301];cellular response to organic cyclic compound [GO:0071407];collagen fibril organization [GO:0030199];endothelial cell-cell adhesion [GO:0071603];endo…	endoplasmic reticulum membrane [GO:0005789];mitochondrion [GO:0005739]	estrogen 16-alpha-hydroxylase activity [GO:0101020];heme binding [GO:0020037];iron ion binding [GO:0005506];lyase activity [GO:0016829];monooxygenase activity [GO:0004497];oxidoreductase activity, acting on paired donors, with incorporation or reduction of molecular oxygen, reduced flavin or flavoprotein as one donor, and incorporation of one atom of oxygen [GO:0016712];oxygen binding [GO:0019825]	GO:0001525;GO:0002930;GO:0004497;GO:0005506;GO:0005739;GO:0005789;GO:0006725;GO:0006805;GO:0006809;GO:0007155;GO:0007601;GO:0008202;GO:0008210;GO:0008285;GO:0008631;GO:0009404;GO:0010575;GO:0016125;GO:0016712;GO:0016829;GO:0019369;GO:0019373;GO:0019825;GO:0020037;GO:0030199;GO:0030336;GO:0032088;GO:0033629;GO:0042572;GO:0042574;GO:0043065;GO:0043542;GO:0045766;GO:0046427;GO:0046466;GO:0048514;GO:…
COLEC12	Q5KU26	Collectin-12	15	22.9	81.514	155.31	3.94587	1.99236	28.0772	28.0895	28.3019	28.3165	28.2467	27.9402	25.5016	25.2264	26.9036	27.0212	26.2488	26.9865	25.2994	carbohydrate mediated signaling [GO:0009756];cellular response to exogenous dsRNA [GO:0071360];defense response [GO:0006952];innate immune response [GO:0045087];phagocytosis, recognition [GO:0006910];positive regulation of cell adhesion molecule production [GO:0060355];protein homooligomerization [GO:0051260];receptor-mediated endocytosis [GO:0006898];regulation of immune response [GO:0050776];to…	collagen trimer [GO:0005581];endocytic vesicle membrane [GO:0030666];extracellular matrix [GO:0031012];extracellular space [GO:0005615];integral component of membrane [GO:0016021];plasma membrane [GO:0005886]	galactose binding [GO:0005534];low-density lipoprotein particle binding [GO:0030169];metal ion binding [GO:0046872];scavenger receptor activity [GO:0005044];signaling pattern recognition receptor activity [GO:0008329]	GO:0005044;GO:0005534;GO:0005581;GO:0005615;GO:0005886;GO:0006898;GO:0006910;GO:0006952;GO:0008329;GO:0009756;GO:0016021;GO:0030169;GO:0030666;GO:0031012;GO:0034138;GO:0045087;GO:0046872;GO:0050776;GO:0051260;GO:0060355;GO:0071360
ALDH3A2	P51648	Fatty aldehyde dehydrogenase	9	22.9	54.847	51.62	6.01774	1.88571	26.5928	26.4134	26.7182	26.895	27.0989	26.8597	24.4018	24.2901	25.1872	25.2968	25.0809	25.2123	24.6718	cellular aldehyde metabolic process [GO:0006081];central nervous system development [GO:0007417];epidermis development [GO:0008544];fatty acid alpha-oxidation [GO:0001561];hexadecanal metabolic process [GO:0046458];oxidation-reduction process [GO:0055114];peripheral nervous system development [GO:0007422];phytol metabolic process [GO:0033306];sesquiterpenoid metabolic process [GO:0006714];sphingo…	endoplasmic reticulum membrane [GO:0005789];integral component of membrane [GO:0016021];intracellular membrane-bounded organelle [GO:0043231];peroxisomal membrane [GO:0005778];peroxisome [GO:0005777]	3-chloroallyl aldehyde dehydrogenase activity [GO:0004028];aldehyde dehydrogenase (NAD) activity [GO:0004029];glyceraldehyde-3-phosphate dehydrogenase (NAD+) (non-phosphorylating) activity [GO:0043878];long-chain-alcohol oxidase activity [GO:0046577];long-chain-aldehyde dehydrogenase activity [GO:0050061];medium-chain-aldehyde dehydrogenase activity [GO:0052814];protein homodimerization activity …	GO:0001561;GO:0004028;GO:0004029;GO:0005777;GO:0005778;GO:0005789;GO:0006081;GO:0006714;GO:0007417;GO:0007422;GO:0008544;GO:0016021;GO:0030148;GO:0033306;GO:0042803;GO:0043231;GO:0043878;GO:0046458;GO:0046577;GO:0050061;GO:0052814;GO:0055114
PTX3	P26022	Pentraxin-related protein PTX3	3	8.4	41.975	40.329	1.39709	1.74249	27.103	27.2139	27.5391	26.3909	26.1729	26.1264	25.6048	22.5314	26.642	25.7875	25.6518	26.3547	22.5344	extracellular matrix organization [GO:0030198];inflammatory response [GO:0006954];innate immune response [GO:0045087];negative regulation by host of viral exo-alpha-sialidase activity [GO:0044869];negative regulation by host of viral glycoprotein metabolic process [GO:0044871];negative regulation of exo-alpha-sialidase activity [GO:1903016];negative regulation of glycoprotein metabolic process [G…	extracellular matrix [GO:0031012];extracellular region [GO:0005576];extracellular space [GO:0005615];specific granule lumen [GO:0035580];tertiary granule lumen [GO:1904724]	(1->3)-beta-D-glucan binding [GO:0001872];complement component C1q binding [GO:0001849];identical protein binding [GO:0042802];virion binding [GO:0046790]	GO:0001550;GO:0001849;GO:0001872;GO:0001878;GO:0005576;GO:0005615;GO:0006954;GO:0008228;GO:0030198;GO:0031012;GO:0035580;GO:0042802;GO:0043312;GO:0044869;GO:0044871;GO:0045087;GO:0045429;GO:0046597;GO:0046790;GO:0050766;GO:1903016;GO:1903019;GO:1904724
GAA	P10253	Lysosomal alpha-glucosidase;76 kDa lysosomal alpha-glucosidase;70 kDa lysosomal alpha-glucosidase	12	21.6	105.32	57.313	1.59227	1.70261	28.2412	28.1416	27.3636	26.932	27.4532	27.422	26.1035	27.1312	26.2656	23.7023	24.0951	25.9244	28.0057	cardiac muscle contraction [GO:0060048];diaphragm contraction [GO:0002086];glucose metabolic process [GO:0006006];glycogen catabolic process [GO:0005980];heart morphogenesis [GO:0003007];locomotory behavior [GO:0007626];lysosome organization [GO:0007040];maltose metabolic process [GO:0000023];muscle cell cellular homeostasis [GO:0046716];neuromuscular process controlling balance [GO:0050885];neur…	azurophil granule membrane [GO:0035577];extracellular exosome [GO:0070062];ficolin-1-rich granule membrane [GO:0101003];lysosomal lumen [GO:0043202];lysosomal membrane [GO:0005765];lysosome [GO:0005764];membrane [GO:0016020];plasma membrane [GO:0005886];tertiary granule membrane [GO:0070821]	alpha-1,4-glucosidase activity [GO:0004558];carbohydrate binding [GO:0030246];maltose alpha-glucosidase activity [GO:0032450]	GO:0000023;GO:0002026;GO:0002086;GO:0003007;GO:0004558;GO:0005764;GO:0005765;GO:0005886;GO:0005980;GO:0005985;GO:0006006;GO:0007040;GO:0007626;GO:0009888;GO:0016020;GO:0030246;GO:0032450;GO:0035577;GO:0043181;GO:0043202;GO:0043312;GO:0046716;GO:0050884;GO:0050885;GO:0060048;GO:0070062;GO:0070821;GO:0101003
HSPB7	Q9UBY9	Heat shock protein beta-7	6	45.3	18.61	71.119	6.05628	1.67706	27.2593	27.5969	27.1237	27.2836	27.6628	27.8351	26.2881	25.2594	25.6923	25.64	25.9344	26.0121	25.6558	heart development [GO:0007507];regulation of heart contraction [GO:0008016];response to unfolded protein [GO:0006986]	aggresome [GO:0016235];Cajal body [GO:0015030];cytoplasm [GO:0005737];nucleoplasm [GO:0005654];nucleus [GO:0005634]	protein C-terminus binding [GO:0008022]	GO:0005634;GO:0005654;GO:0005737;GO:0006986;GO:0007507;GO:0008016;GO:0008022;GO:0015030;GO:0016235
CLPX	O76031	ATP-dependent Clp protease ATP-binding subunit clpX-like, mitochondrial	18	30.8	69.223	253.44	5.74002	1.67006	26.2449	26.1861	26.25	27.1027	26.819	27.0305	25.1112	24.9249	24.9725	25.09	24.96	25.0222	24.4677	ATP metabolic process [GO:0046034];protein catabolic process [GO:0030163];protein folding [GO:0006457];proteolysis involved in cellular protein catabolic process [GO:0051603]	cytosol [GO:0005829];endopeptidase Clp complex [GO:0009368];mitochondrial endopeptidase Clp complex [GO:0009841];mitochondrial inner membrane [GO:0005743];mitochondrial matrix [GO:0005759];mitochondrial nucleoid [GO:0042645];mitochondrion [GO:0005739];nucleoplasm [GO:0005654]	ATPase activity [GO:0016887];ATP binding [GO:0005524];ATP-dependent peptidase activity [GO:0004176];metal ion binding [GO:0046872];peptidase activator activity [GO:0016504];unfolded protein binding [GO:0051082]	GO:0004176;GO:0005524;GO:0005654;GO:0005739;GO:0005743;GO:0005759;GO:0005829;GO:0006457;GO:0009368;GO:0009841;GO:0016504;GO:0016887;GO:0030163;GO:0042645;GO:0046034;GO:0046872;GO:0051082;GO:0051603
FAH	P16930	Fumarylacetoacetase	4	14.3	46.374	11.825	2.87278	1.61392	26.3002	25.7501	26.978	27.1802	26.0484	26.371	25.3346	25.2046	23.3961	25.0543	25.0299	NaN	24.9247	arginine catabolic process [GO:0006527];homogentisate catabolic process [GO:1902000];L-phenylalanine catabolic process [GO:0006559];tyrosine catabolic process [GO:0006572]	cytosol [GO:0005829];extracellular exosome [GO:0070062]	fumarylacetoacetase activity [GO:0004334];metal ion binding [GO:0046872]	GO:0004334;GO:0005829;GO:0006527;GO:0006559;GO:0006572;GO:0046872;GO:0070062;GO:1902000
PLA2G4A	P47712	Cytosolic phospholipase A2;Phospholipase A2;Lysophospholipase	5	7.7	85.238	12.452	2.30037	1.59062	24.7259	24.0316	24.1996	25.7591	25.4298	25.5893	NaN	23.3158	23.8866	NaN	NaN	22.8347	23.4239	arachidonic acid metabolic process [GO:0019369];arachidonic acid secretion [GO:0050482];cardiolipin acyl-chain remodeling [GO:0035965];cellular response to antibiotic [GO:0071236];glycerophospholipid catabolic process [GO:0046475];icosanoid biosynthetic process [GO:0046456];icosanoid metabolic process [GO:0006690];phosphatidic acid biosynthetic process [GO:0006654];phosphatidylcholine acyl-chain …	cytoplasm [GO:0005737];cytoplasmic vesicle [GO:0031410];cytosol [GO:0005829];endoplasmic reticulum [GO:0005783];endoplasmic reticulum membrane [GO:0005789];Golgi apparatus [GO:0005794];lipid droplet [GO:0005811];mitochondrial inner membrane [GO:0005743];nucleus [GO:0005634]	calcium-dependent phospholipase A2 activity [GO:0047498];calcium-dependent phospholipid binding [GO:0005544];calcium ion binding [GO:0005509];lysophospholipase activity [GO:0004622];phospholipase A2 activity [GO:0004623];phospholipase A2 activity (consuming 1,2-dipalmitoylphosphatidylcholine) [GO:0102567];phospholipase A2 activity consuming 1,2-dioleoylphosphatidylethanolamine) [GO:0102568]	GO:0004622;GO:0004623;GO:0005509;GO:0005544;GO:0005634;GO:0005737;GO:0005743;GO:0005783;GO:0005789;GO:0005794;GO:0005811;GO:0005829;GO:0006644;GO:0006654;GO:0006663;GO:0006690;GO:0019369;GO:0031410;GO:0035965;GO:0036148;GO:0036149;GO:0036150;GO:0036151;GO:0036152;GO:0042127;GO:0046456;GO:0046475;GO:0047498;GO:0050482;GO:0071236;GO:0102567;GO:0102568
OAT	P04181	Ornithine aminotransferase, mitochondrial;Ornithine aminotransferase, hepatic form;Ornithine aminotransferase, renal form	13	40.8	48.534	158.89	4.77605	1.58936	26.9407	26.9845	26.9662	27.766	28.0637	27.7551	26.0123	25.6388	25.8411	25.8141	26.3142	25.6227	25.52	arginine catabolic process to glutamate [GO:0019544];arginine catabolic process to proline via ornithine [GO:0010121];cellular amino acid biosynthetic process [GO:0008652];L-proline biosynthetic process [GO:0055129];protein hexamerization [GO:0034214];visual perception [GO:0007601]	cytoplasm [GO:0005737];mitochondrial matrix [GO:0005759];mitochondrion [GO:0005739];nucleoplasm [GO:0005654]	ornithine-oxo-acid transaminase activity [GO:0004587];pyridoxal phosphate binding [GO:0030170]	GO:0004587;GO:0005654;GO:0005737;GO:0005739;GO:0005759;GO:0007601;GO:0008652;GO:0010121;GO:0019544;GO:0030170;GO:0034214;GO:0055129
PLD3	Q8IV08	Phospholipase D3	5	11.6	54.705	40.802	4.46739	1.54872	28.2806	28.6578	28.3314	27.827	27.9962	27.756	27.4656	26.6764	26.3478	26.2202	26.0887	26.4793	26.8715	lipid catabolic process [GO:0016042]	endoplasmic reticulum membrane [GO:0005789];extracellular exosome [GO:0070062];integral component of membrane [GO:0016021]	N-acylphosphatidylethanolamine-specific phospholipase D activity [GO:0070290];phospholipase D activity [GO:0004630]	GO:0004630;GO:0005789;GO:0016021;GO:0016042;GO:0070062;GO:0070290
DPP7	Q9UHL4	Dipeptidyl peptidase 2	9	22.4	54.341	14.069	3.1726	1.47447	27.3175	27.5122	27.6523	26.3987	26.8373	26.7777	24.7452	26.1908	25.9063	25.0646	25.0646	26.0816	26.2039	neutrophil degranulation [GO:0043312];proteolysis [GO:0006508]	azurophil granule lumen [GO:0035578];cytosol [GO:0005829];extracellular exosome [GO:0070062];extracellular region [GO:0005576];Golgi apparatus [GO:0005794];intracellular membrane-bounded organelle [GO:0043231];vesicle [GO:0031982]	dipeptidyl-peptidase activity [GO:0008239];serine-type peptidase activity [GO:0008236]	GO:0005576;GO:0005794;GO:0005829;GO:0006508;GO:0008236;GO:0008239;GO:0031982;GO:0035578;GO:0043231;GO:0043312;GO:0070062
PSD3	Q9NYI0	PH and SEC7 domain-containing protein 3	11	14.3	116.03	217.35	1.81629	1.36594	24.4908	24.6747	24.7196	25.6551	25.5392	25.3902	24.6399	22.6167	24.4805	25.1055	23.355	23.4934	22.2952	regulation of ARF protein signal transduction [GO:0032012]	cell junction [GO:0030054];postsynaptic density [GO:0014069];postsynaptic membrane [GO:0045211];ruffle membrane [GO:0032587]	ARF guanyl-nucleotide exchange factor activity [GO:0005086]	GO:0005086;GO:0014069;GO:0030054;GO:0032012;GO:0032587;GO:0045211
PLIN2	Q99541	Perilipin-2	11	31.1	48.075	97.511	2.66548	1.36328	27.4606	27.7283	27.5399	26.0167	25.7799	26.1575	25.2485	25.0799	25.6035	25.6863	25.3736	25.5126	25.4161	lipid storage [GO:0019915];long-chain fatty acid transport [GO:0015909];regulation of lipid metabolic process [GO:0019216];response to drug [GO:0042493];response to organic cyclic compound [GO:0014070]	cytosol [GO:0005829];endoplasmic reticulum [GO:0005783];extracellular region [GO:0005576];lipid droplet [GO:0005811];nucleus [GO:0005634];plasma membrane [GO:0005886]		GO:0005576;GO:0005634;GO:0005783;GO:0005811;GO:0005829;GO:0005886;GO:0014070;GO:0015909;GO:0019216;GO:0019915;GO:0042493
NT5E	P21589	5-nucleotidase	11	28.2	63.367	323.31	2.3467	1.29461	25.2867	25.0005	25.3588	24.7068	24.6296	25.4765	22.0777	24.6334	24.0841	23.8672	24.1674	23.5029	24.1403	adenosine biosynthetic process [GO:0046086];AMP catabolic process [GO:0006196];DNA metabolic process [GO:0006259];leukocyte cell-cell adhesion [GO:0007159];NAD metabolic process [GO:0019674];negative regulation of inflammatory response [GO:0050728];purine nucleotide catabolic process [GO:0006195];pyrimidine nucleoside catabolic process [GO:0046135]	anchored component of membrane [GO:0031225];cell surface [GO:0009986];cytosol [GO:0005829];extracellular exosome [GO:0070062];membrane [GO:0016020];nucleoplasm [GO:0005654];plasma membrane [GO:0005886]	5'-nucleotidase activity [GO:0008253];metal ion binding [GO:0046872];nucleotide binding [GO:0000166]	GO:0000166;GO:0005654;GO:0005829;GO:0005886;GO:0006195;GO:0006196;GO:0006259;GO:0007159;GO:0008253;GO:0009986;GO:0016020;GO:0019674;GO:0031225;GO:0046086;GO:0046135;GO:0046872;GO:0050728;GO:0070062
DCLK1	O15075	Serine/threonine-protein kinase DCLK1	11	20.5	82.223	206.82	1.38526	1.27409	24.8612	25.4371	25.5816	25.5178	25.578	25.4132	NaN	23.9977	25.1336	23.0228	22.1737	24.9805	25.436	axon extension [GO:0048675];central nervous system development [GO:0007417];central nervous system projection neuron axonogenesis [GO:0021952];dendrite morphogenesis [GO:0048813];endosomal transport [GO:0016197];forebrain development [GO:0030900];intracellular signal transduction [GO:0035556];negative regulation of protein localization to nucleus [GO:1900181];nervous system development [GO:000739…	integral component of plasma membrane [GO:0005887];postsynaptic density [GO:0014069]	ATP binding [GO:0005524];protein kinase activity [GO:0004672];protein serine/threonine kinase activity [GO:0004674]	GO:0001764;GO:0004672;GO:0004674;GO:0005524;GO:0005887;GO:0006468;GO:0007399;GO:0007417;GO:0009615;GO:0014069;GO:0016197;GO:0018105;GO:0021952;GO:0030900;GO:0035556;GO:0048675;GO:0048813;GO:1900181
ASS1	P00966	Argininosuccinate synthase	17	42	46.53	188.87	4.21596	1.24256	28.1113	27.8088	28.0416	27.8684	28.3134	28.1399	26.3748	27.2941	26.879	26.7712	26.385	26.4329	27.4958	acute-phase response [GO:0006953];aging [GO:0007568];arginine biosynthetic process [GO:0006526];argininosuccinate metabolic process [GO:0000053];aspartate metabolic process [GO:0006531];cellular response to amine stimulus [GO:0071418];cellular response to amino acid stimulus [GO:0071230];cellular response to ammonium ion [GO:0071242];cellular response to cAMP [GO:0071320];cellular response to dex…	cell body fiber [GO:0070852];cytoplasm [GO:0005737];cytosol [GO:0005829];endoplasmic reticulum [GO:0005783];extracellular exosome [GO:0070062];lysosome [GO:0005764];mitochondrial outer membrane [GO:0005741];nucleus [GO:0005634];perikaryon [GO:0043204]	amino acid binding [GO:0016597];argininosuccinate synthase activity [GO:0004055];ATP binding [GO:0005524];identical protein binding [GO:0042802];RNA binding [GO:0003723];toxic substance binding [GO:0015643]	GO:0000050;GO:0000052;GO:0000053;GO:0001822;GO:0001889;GO:0003723;GO:0004055;GO:0005524;GO:0005634;GO:0005737;GO:0005741;GO:0005764;GO:0005783;GO:0005829;GO:0006526;GO:0006531;GO:0006953;GO:0007494;GO:0007568;GO:0007584;GO:0007623;GO:0010043;GO:0010046;GO:0015643;GO:0016597;GO:0032355;GO:0042802;GO:0043204;GO:0045429;GO:0060416;GO:0060539;GO:0070062;GO:0070852;GO:0071222;GO:0071230;GO:0071242;GO:…
IFITM3;IFITM1;IFITM2	Q01628;P13164;Q01629	Interferon-induced transmembrane protein 3;Interferon-induced transmembrane protein 1;Interferon-induced transmembrane protein 2	2	30.8	14.632	226.16	2.52669	1.23944	27.0773	26.9513	26.9299	26.7167	26.1926	26.5504	25.0846	25.0038	26.1447	25.6779	25.7962	26.4539	24.3175	defense response to virus [GO:0051607];immune response [GO:0006955];negative regulation of viral entry into host cell [GO:0046597];negative regulation of viral genome replication [GO:0045071];negative regulation of viral transcription [GO:0032897];response to interferon-alpha [GO:0035455];response to interferon-beta [GO:0035456];response to interferon-gamma [GO:0034341];response to virus [GO:0009…	integral component of membrane [GO:0016021];late endosome membrane [GO:0031902];lysosomal membrane [GO:0005765];plasma membrane [GO:0005886];protein-containing complex [GO:0032991];integral component of membrane [GO:0016021];membrane [GO:0016020];plasma membrane [GO:0005886];protein-containing complex [GO:0032991];integral component of membrane [GO:0016021];plasma membrane [GO:0005886];protein-co…		GO:0005765;GO:0005886;GO:0006955;GO:0009615;GO:0016021;GO:0031902;GO:0032897;GO:0032991;GO:0034341;GO:0035455;GO:0035456;GO:0045071;GO:0046597;GO:0051607;GO:0060337;GO:0001503;GO:0005886;GO:0007166;GO:0008285;GO:0009615;GO:0016020;GO:0016021;GO:0030336;GO:0032991;GO:0034341;GO:0035455;GO:0035456;GO:0045071;GO:0045669;GO:0046597;GO:0050776;GO:0051607;GO:0060337;GO:0005886;GO:0006955;GO:0009615;GO:…
GSN	P06396	Gelsolin	27	39.1	85.696	323.31	3.38817	1.21803	28.7265	28.9316	29.1288	29.7947	29.6924	29.2835	28.6864	27.7665	28.3619	27.8057	27.6121	27.5818	28.4764	actin filament capping [GO:0051693];actin filament polymerization [GO:0030041];actin filament reorganization [GO:0090527];actin filament severing [GO:0051014];actin nucleation [GO:0045010];aging [GO:0007568];amyloid fibril formation [GO:1990000];barbed-end actin filament capping [GO:0051016];cellular protein metabolic process [GO:0044267];cellular response to cadmium ion [GO:0071276];cellular res…	actin cap [GO:0030478];actin cytoskeleton [GO:0015629];blood microparticle [GO:0072562];cortical actin cytoskeleton [GO:0030864];cytoplasm [GO:0005737];cytosol [GO:0005829];extracellular exosome [GO:0070062];extracellular region [GO:0005576];extracellular space [GO:0005615];ficolin-1-rich granule lumen [GO:1904813];focal adhesion [GO:0005925];lamellipodium [GO:0030027];myelin sheath [GO:0043209];…	actin binding [GO:0003779];actin filament binding [GO:0051015];calcium ion binding [GO:0005509];myosin II binding [GO:0045159]	GO:0001726;GO:0002102;GO:0003779;GO:0005509;GO:0005576;GO:0005615;GO:0005737;GO:0005829;GO:0005886;GO:0005925;GO:0006911;GO:0007568;GO:0010628;GO:0014003;GO:0014891;GO:0015629;GO:0016528;GO:0030027;GO:0030041;GO:0030155;GO:0030478;GO:0030864;GO:0031648;GO:0034774;GO:0042246;GO:0042989;GO:0043209;GO:0043312;GO:0044267;GO:0045010;GO:0045159;GO:0045335;GO:0045471;GO:0046597;GO:0048015;GO:0048471;GO:…
HSPB6	O14558	Heat shock protein beta-6	6	68.8	17.135	210.35	1.40896	1.21695	26.4253	26.117	26.2047	26.637	27.2127	26.9355	26.7756	25.9956	25.1309	22.9431	25.4576	25.33	25.9695	chaperone-mediated protein folding [GO:0061077];negative regulation of cardiac muscle cell apoptotic process [GO:0010667];positive regulation of angiogenesis [GO:0045766];regulation of muscle contraction [GO:0006937]	cytoplasm [GO:0005737];extracellular region [GO:0005576];nucleus [GO:0005634]	chaperone binding [GO:0051087];protein homodimerization activity [GO:0042803];structural constituent of eye lens [GO:0005212];unfolded protein binding [GO:0051082]	GO:0005212;GO:0005576;GO:0005634;GO:0005737;GO:0006937;GO:0010667;GO:0042803;GO:0045766;GO:0051082;GO:0051087;GO:0061077
ANTXR2	P58335	Anthrax toxin receptor 2	5	10.4	53.666	9.2479	1.76828	1.213	24.5223	24.5473	24.2551	25.8997	26.1081	26.5548	NaN	24.3974	24.1155	23.5098	23.9449	24.337	24.3047	reproductive process [GO:0022414];toxin transport [GO:1901998]	cell surface [GO:0009986];endoplasmic reticulum membrane [GO:0005789];endosome membrane [GO:0010008];external side of plasma membrane [GO:0009897];extracellular region [GO:0005576];integral component of membrane [GO:0016021];plasma membrane [GO:0005886]	metal ion binding [GO:0046872];transmembrane signaling receptor activity [GO:0004888]	GO:0004888;GO:0005576;GO:0005789;GO:0005886;GO:0009897;GO:0009986;GO:0010008;GO:0016021;GO:0022414;GO:0046872;GO:1901998
COL6A2	P12110	Collagen alpha-2(VI) chain	26	32.4	108.58	231.9	2.47636	1.20678	29.7267	29.8859	30.2277	30.6751	30.0496	29.8604	29.1899	27.5508	29.3611	29.4588	29.1596	29.1837	28.1449	cell adhesion [GO:0007155];extracellular matrix organization [GO:0030198];growth plate cartilage chondrocyte morphogenesis [GO:0003429];protein heterotrimerization [GO:0070208];response to glucose [GO:0009749]	collagen-containing extracellular matrix [GO:0062023];collagen trimer [GO:0005581];endoplasmic reticulum lumen [GO:0005788];extracellular exosome [GO:0070062];extracellular matrix [GO:0031012];extracellular region [GO:0005576];extracellular space [GO:0005615];extracellular vesicle [GO:1903561];protein-containing complex [GO:0032991];sarcolemma [GO:0042383]	extracellular matrix structural constituent conferring tensile strength [GO:0030020]	GO:0003429;GO:0005576;GO:0005581;GO:0005615;GO:0005788;GO:0007155;GO:0009749;GO:0030020;GO:0030198;GO:0031012;GO:0032991;GO:0042383;GO:0062023;GO:0070062;GO:0070208;GO:1903561
GYS1	P13807	Glycogen [starch] synthase, muscle	8	11.7	83.785	43.639	2.21178	1.19889	26.9383	27.9633	27.8459	26.3494	26.4856	26.6734	25.8579	24.7671	26.2644	26.3764	25.3539	26.1543	26.1325	glycogen biosynthetic process [GO:0005978];heart development [GO:0007507]	cytoplasm [GO:0005737];cytosol [GO:0005829];inclusion body [GO:0016234];membrane [GO:0016020]	glucose binding [GO:0005536];glycogen (starch) synthase activity [GO:0004373];glycogen synthase activity, transferring glucose-1-phosphate [GO:0061547];protein kinase binding [GO:0019901]	GO:0004373;GO:0005536;GO:0005737;GO:0005829;GO:0005978;GO:0007507;GO:0016020;GO:0016234;GO:0019901;GO:0061547
NEU1	Q99519	Sialidase-1	5	18.8	45.467	6.2607	2.42664	1.1727	25.8837	26.0576	26.1356	NaN	25.0923	25.3208	NaN	25.3008	24.6478	24.2419	23.765	24.3803	24.816	ganglioside catabolic process [GO:0006689];glycosphingolipid metabolic process [GO:0006687];neutrophil degranulation [GO:0043312];oligosaccharide catabolic process [GO:0009313]	cell junction [GO:0030054];cytoplasm [GO:0005737];extracellular exosome [GO:0070062];extracellular region [GO:0005576];intracellular membrane-bounded organelle [GO:0043231];lysosomal lumen [GO:0043202];lysosomal membrane [GO:0005765];lysosome [GO:0005764];membrane [GO:0016020];plasma membrane [GO:0005886];specific granule lumen [GO:0035580]	alpha-sialidase activity [GO:0016997];exo-alpha-(2->3)-sialidase activity [GO:0052794];exo-alpha-(2->6)-sialidase activity [GO:0052795];exo-alpha-(2->8)-sialidase activity [GO:0052796];exo-alpha-sialidase activity [GO:0004308]	GO:0004308;GO:0005576;GO:0005737;GO:0005764;GO:0005765;GO:0005886;GO:0006687;GO:0006689;GO:0009313;GO:0016020;GO:0016997;GO:0030054;GO:0035580;GO:0043202;GO:0043231;GO:0043312;GO:0052794;GO:0052795;GO:0052796;GO:0070062
RFTN1	Q14699	Raftlin	12	34.8	63.145	139.51	4.433	1.15784	26.4735	26.246	26.7566	26.5051	26.4138	25.9137	25.1368	24.8182	25.1861	25.4241	25.2674	25.8346	24.9214	B cell receptor signaling pathway [GO:0050853];dsRNA transport [GO:0033227];interleukin-17 production [GO:0032620];membrane raft assembly [GO:0001765];positive regulation of growth rate [GO:0040010];protein localization to membrane raft [GO:1903044];protein transport into membrane raft [GO:0032596];response to exogenous dsRNA [GO:0043330];T cell antigen processing and presentation [GO:0002457];T …	cytoplasm [GO:0005737];early endosome [GO:0005769];endosome [GO:0005768];extracellular exosome [GO:0070062];membrane raft [GO:0045121];plasma membrane [GO:0005886];protein-containing complex [GO:0032991]	double-stranded RNA binding [GO:0003725]	GO:0001765;GO:0002457;GO:0003725;GO:0005737;GO:0005768;GO:0005769;GO:0005886;GO:0032596;GO:0032620;GO:0032991;GO:0033227;GO:0034138;GO:0040010;GO:0043330;GO:0045121;GO:0050852;GO:0050853;GO:0070062;GO:1903044
SEPT10	Q9P0V9	Septin-10	6	19.4	52.592	285.64	1.81568	1.1552	26.4013	26.185	25.7113	NaN	25.3785	25.6687	23.8194	25.0106	25.4889	25.917	23.9754	24.0872	24.6977	cytoskeleton-dependent cytokinesis [GO:0061640]	microtubule cytoskeleton [GO:0015630];septin complex [GO:0031105];septin ring [GO:0005940]	GTPase activity [GO:0003924];GTP binding [GO:0005525]	GO:0003924;GO:0005525;GO:0005940;GO:0015630;GO:0031105;GO:0061640
FARP1	Q9Y4F1	FERM, RhoGEF and pleckstrin domain-containing protein 1	19	23	118.63	323.31	4.13276	1.15065	25.7445	25.9782	25.9276	25.4869	25.4266	25.1694	24.7011	25.0766	24.5278	24.0112	24.2076	24.2534	24.5231	dendrite morphogenesis [GO:0048813];negative regulation of phosphatase activity [GO:0010923];regulation of Rho protein signal transduction [GO:0035023];synapse assembly [GO:0007416]	cell junction [GO:0030054];cytoskeleton [GO:0005856];cytosol [GO:0005829];dendrite [GO:0030425];dendritic spine [GO:0043197];extrinsic component of cytoplasmic side of plasma membrane [GO:0031234];filopodium [GO:0030175]	cytoskeletal protein binding [GO:0008092];Rac guanyl-nucleotide exchange factor activity [GO:0030676];Rho guanyl-nucleotide exchange factor activity [GO:0005089]	GO:0005089;GO:0005829;GO:0005856;GO:0007416;GO:0008092;GO:0010923;GO:0030054;GO:0030175;GO:0030425;GO:0030676;GO:0031234;GO:0035023;GO:0043197;GO:0048813
HSPA12A	O43301	Heat shock 70 kDa protein 12A	11	21	74.977	50.096	1.85169	1.12089	25.3676	24.9452	25.1278	25.1096	25.0283	25.1138	22.8006	24.2863	24.2515	22.6911	24.0121	25.0486	24.8713		extracellular exosome [GO:0070062]	ATP binding [GO:0005524]	GO:0005524;GO:0070062
POLDIP2	Q9Y2S7	Polymerase delta-interacting protein 2	6	19.6	42.033	46.64	4.74114	1.11833	24.2609	24.431	24.5064	24.7574	25.1442	24.9513	23.59	23.4211	23.5891	23.576	24.0045	23.3836	23.3336	mitochondrion morphogenesis [GO:0070584];negative regulation of macroautophagy [GO:0016242];positive regulation of mitotic cell cycle [GO:0045931]	mitochondrial nucleoid [GO:0042645];mitochondrion [GO:0005739];nucleus [GO:0005634]	DNA binding [GO:0003677]	GO:0003677;GO:0005634;GO:0005739;GO:0016242;GO:0042645;GO:0045931;GO:0070584
CES2	O00748	Cocaine esterase	3	6.3	61.806	11.126	2.48334	1.10601	24.0363	24.4989	24.9386	25.0241	24.9858	25.2931	24.018	NaN	23.3477	NaN	NaN	23.443	23.9517	catabolic process [GO:0009056];prostaglandin metabolic process [GO:0006693];xenobiotic metabolic process [GO:0006805]	endoplasmic reticulum [GO:0005783];endoplasmic reticulum lumen [GO:0005788];extracellular space [GO:0005615]	carboxylic ester hydrolase activity [GO:0052689];methyl indole-3-acetate esterase activity [GO:0080030];methylumbelliferyl-acetate deacetylase activity [GO:0047374]	GO:0005615;GO:0005783;GO:0005788;GO:0006693;GO:0006805;GO:0009056;GO:0047374;GO:0052689;GO:0080030
KPNA2	P52292	Importin subunit alpha-1	7	17.2	57.861	32.259	2.19564	1.09868	25.6622	25.8727	26.0509	27.3969	26.2182	26.6319	25.8219	24.4301	25.3669	25.366	25.1538	25.7826	24.5261	DNA metabolic process [GO:0006259];entry of viral genome into host nucleus through nuclear pore complex via importin [GO:0075506];modulation by virus of host cellular process [GO:0019054];NLS-bearing protein import into nucleus [GO:0006607];positive regulation of viral life cycle [GO:1903902];postsynapse to nucleus signaling pathway [GO:0099527];regulation of DNA recombination [GO:0000018]	cytoplasm [GO:0005737];cytosol [GO:0005829];extrinsic component of postsynaptic specialization membrane [GO:0098892];glutamatergic synapse [GO:0098978];host cell [GO:0043657];membrane [GO:0016020];nucleoplasm [GO:0005654]	histone deacetylase binding [GO:0042826];nuclear import signal receptor activity [GO:0061608];nuclear localization sequence binding [GO:0008139];RNA binding [GO:0003723]	GO:0000018;GO:0003723;GO:0005654;GO:0005737;GO:0005829;GO:0006259;GO:0006607;GO:0008139;GO:0016020;GO:0019054;GO:0042826;GO:0043657;GO:0061608;GO:0075506;GO:0098892;GO:0098978;GO:0099527;GO:1903902
PTPRS	Q13332	Receptor-type tyrosine-protein phosphatase S	8	6.3	217.04	26.964	1.97943	1.09859	24.07	24.277	24.4096	25.8607	25.27	25.6415	23.3303	23.2967	24.2705	24.1423	23.5954	24.6149	23.51	cerebellum development [GO:0021549];cerebral cortex development [GO:0021987];corpus callosum development [GO:0022038];establishment of endothelial intestinal barrier [GO:0090557];hippocampus development [GO:0021766];modulation of chemical synaptic transmission [GO:0050804];negative regulation of axon extension [GO:0030517];negative regulation of axon regeneration [GO:0048681];negative regulation …	axon [GO:0030424];cell junction [GO:0030054];extracellular exosome [GO:0070062];glutamatergic synapse [GO:0098978];integral component of plasma membrane [GO:0005887];integral component of postsynaptic density membrane [GO:0099061];integral component of presynaptic membrane [GO:0099056];integral component of synaptic vesicle membrane [GO:0030285];perikaryon [GO:0043204];plasma membrane [GO:0005886…	chondroitin sulfate binding [GO:0035374];heparan sulfate proteoglycan binding [GO:0043395];heparin binding [GO:0008201];phosphoprotein phosphatase activity [GO:0004721];protein tyrosine phosphatase activity [GO:0004725]	GO:0004721;GO:0004725;GO:0005886;GO:0005887;GO:0006470;GO:0008201;GO:0010977;GO:0021510;GO:0021549;GO:0021766;GO:0021987;GO:0022038;GO:0030054;GO:0030285;GO:0030424;GO:0030517;GO:0032687;GO:0032688;GO:0034164;GO:0035335;GO:0035374;GO:0043204;GO:0043395;GO:0048671;GO:0048681;GO:0050804;GO:0061000;GO:0070062;GO:0090557;GO:0098685;GO:0098978;GO:0099056;GO:0099061;GO:0099151;GO:0099560
ANK2	Q01484	Ankyrin-2	19	7.2	433.71	82.305	1.61895	1.09212	24.363	24.7169	24.4044	24.6682	24.9063	24.6582	23.3931	21.8475	24.2938	22.8443	23.6356	24.9589	23.7186	atrial cardiac muscle cell action potential [GO:0086014];atrial cardiac muscle cell to AV node cell communication [GO:0086066];atrial septum development [GO:0003283];cellular calcium ion homeostasis [GO:0006874];cellular protein localization [GO:0034613];endocytosis [GO:0006897];endoplasmic reticulum to Golgi vesicle-mediated transport [GO:0006888];membrane depolarization during SA node cell acti…	A band [GO:0031672];apical plasma membrane [GO:0016324];axon initial segment [GO:0043194];basolateral plasma membrane [GO:0016323];costamere [GO:0043034];cytoskeleton [GO:0005856];cytosol [GO:0005829];early endosome [GO:0005769];intercalated disc [GO:0014704];lysosome [GO:0005764];M band [GO:0031430];membrane [GO:0016020];membrane raft [GO:0045121];mitochondrion [GO:0005739];plasma membrane [GO:0…	ATPase binding [GO:0051117];enzyme binding [GO:0019899];ion channel binding [GO:0044325];phosphorylation-dependent protein binding [GO:0140031];protein binding, bridging [GO:0030674];protein kinase binding [GO:0019901];spectrin binding [GO:0030507];structural constituent of cytoskeleton [GO:0005200]	GO:0002027;GO:0003283;GO:0005200;GO:0005739;GO:0005764;GO:0005769;GO:0005829;GO:0005856;GO:0005886;GO:0006874;GO:0006888;GO:0006897;GO:0010628;GO:0010881;GO:0010882;GO:0014704;GO:0015031;GO:0016020;GO:0016323;GO:0016324;GO:0019899;GO:0019901;GO:0030018;GO:0030315;GO:0030507;GO:0030674;GO:0030913;GO:0031430;GO:0031647;GO:0031672;GO:0033292;GO:0033365;GO:0034394;GO:0034613;GO:0036309;GO:0036371;GO:…
EML1	O00423	Echinoderm microtubule-associated protein-like 1	11	15.2	89.86	200.24	1.92805	1.07939	25.7466	25.8501	25.8387	25.1816	24.7147	25.1572	23.6235	24.1166	24.2747	24.238	23.7443	24.4198	25.9311	brain development [GO:0007420];hematopoietic progenitor cell differentiation [GO:0002244];microtubule cytoskeleton organization [GO:0000226];mitotic spindle organization [GO:0007052];neuroblast proliferation [GO:0007405]	cytosol [GO:0005829];microtubule [GO:0005874];microtubule associated complex [GO:0005875];mitotic spindle midzone [GO:1990023];mitotic spindle pole [GO:0097431];perinuclear region of cytoplasm [GO:0048471]	calcium ion binding [GO:0005509];microtubule binding [GO:0008017];tubulin binding [GO:0015631]	GO:0000226;GO:0002244;GO:0005509;GO:0005829;GO:0005874;GO:0005875;GO:0007052;GO:0007405;GO:0007420;GO:0008017;GO:0015631;GO:0048471;GO:0097431;GO:1990023
C1orf198	Q9H425	Uncharacterized protein C1orf198	13	53.5	36.346	115.62	2.08781	1.07801	27.2355	27.288	27.233	26.6364	26.4749	26.6404	26.138	27.212	25.0492	25.0366	25.9938	25.6837	25.7669		cytosol [GO:0005829]		GO:0005829
CKB	P12277	Creatine kinase B-type	10	41.7	42.644	323.31	2.33977	1.06259	25.1677	25.1003	25.2676	26.314	26.2227	26.4542	24.9473	25.1679	24.0266	24.6443	24.3181	24.5388	25.1996	cellular chloride ion homeostasis [GO:0030644];cerebellum development [GO:0021549];creatine metabolic process [GO:0006600];phosphocreatine biosynthetic process [GO:0046314];substantia nigra development [GO:0021762]	cytosol [GO:0005829];dendrite [GO:0030425];extracellular exosome [GO:0070062];extracellular space [GO:0005615];neuronal cell body [GO:0043025];nucleus [GO:0005634]	ATP binding [GO:0005524];creatine kinase activity [GO:0004111];kinase activity [GO:0016301];ubiquitin protein ligase binding [GO:0031625]	GO:0004111;GO:0005524;GO:0005615;GO:0005634;GO:0005829;GO:0006600;GO:0016301;GO:0021549;GO:0021762;GO:0030425;GO:0030644;GO:0031625;GO:0043025;GO:0046314;GO:0070062
MTSS1L	Q765P7	MTSS1-like protein	6	9.5	79.928	20.234	2.54634	1.06188	25.3831	25.9303	25.7822	25.2062	24.8025	24.4833	NaN	24.7373	24.3439	24.3809	23.7903	23.8441	24.1197	activation of GTPase activity [GO:0090630];cellular response to platelet-derived growth factor stimulus [GO:0036120];lamellipodium organization [GO:0097581];plasma membrane organization [GO:0007009];ruffle assembly [GO:0097178]	cortical actin cytoskeleton [GO:0030864];lamellipodium [GO:0030027];ruffle membrane [GO:0032587]	actin monomer binding [GO:0003785];GTPase activator activity [GO:0005096];phosphatidylinositol-4,5-bisphosphate binding [GO:0005546];Rac GTPase binding [GO:0048365]	GO:0003785;GO:0005096;GO:0005546;GO:0007009;GO:0030027;GO:0030864;GO:0032587;GO:0036120;GO:0048365;GO:0090630;GO:0097178;GO:0097581
HEBP2	Q9Y5Z4	Heme-binding protein 2	3	17.1	22.875	21.484	1.3401	1.05295	27.8858	25.8659	27.5669	28.806	26.1075	26.1124	25.9473	25.8848	25.8781	26.4638	26.0909	25.518	26.2484	negative regulation of mitochondrial membrane potential [GO:0010917];neutrophil degranulation [GO:0043312];positive regulation of mitochondrial membrane permeability [GO:0035794];positive regulation of necrotic cell death [GO:0010940]	azurophil granule lumen [GO:0035578];cytoplasm [GO:0005737];extracellular exosome [GO:0070062];extracellular region [GO:0005576];mitochondrion [GO:0005739]	heme binding [GO:0020037]	GO:0005576;GO:0005737;GO:0005739;GO:0010917;GO:0010940;GO:0020037;GO:0035578;GO:0035794;GO:0043312;GO:0070062
UBQLN4	Q9NRR5	Ubiquilin-4	6	23	63.852	88.025	2.63843	1.03817	23.1302	23.7014	22.7934	23.5687	23.8092	NaN	22.819	21.4364	22.4772	22.4338	22.6683	22.3996	22.3028	autophagy [GO:0006914];cellular response to DNA damage stimulus [GO:0006974];DNA repair [GO:0006281];negative regulation of autophagosome maturation [GO:1901097];negative regulation of double-strand break repair via homologous recombination [GO:2000042];regulation of proteasomal ubiquitin-dependent protein catabolic process [GO:0032434];ubiquitin-dependent protein catabolic process [GO:0006511]	autophagosome [GO:0005776];cytoplasm [GO:0005737];cytoplasmic vesicle [GO:0031410];cytosol [GO:0005829];endoplasmic reticulum membrane [GO:0005789];nucleus [GO:0005634];perinuclear region of cytoplasm [GO:0048471];site of DNA damage [GO:0090734]	identical protein binding [GO:0042802];polyubiquitin modification-dependent protein binding [GO:0031593]	GO:0005634;GO:0005737;GO:0005776;GO:0005789;GO:0005829;GO:0006281;GO:0006511;GO:0006914;GO:0006974;GO:0031410;GO:0031593;GO:0032434;GO:0042802;GO:0048471;GO:0090734;GO:1901097;GO:2000042
ALDH2	P05091	Aldehyde dehydrogenase, mitochondrial	19	44.3	56.381	117.76	1.9375	1.02397	27.3	27.4842	27.4938	28.9282	29.1469	28.6292	26.5631	27.434	27.5307	27.1382	26.939	27.3107	27.0625	alcohol metabolic process [GO:0006066];carbohydrate metabolic process [GO:0005975];ethanol catabolic process [GO:0006068];ethanol oxidation [GO:0006069]	extracellular exosome [GO:0070062];mitochondrial matrix [GO:0005759]	aldehyde dehydrogenase (NAD) activity [GO:0004029];aldehyde dehydrogenase [NAD(P)+] activity [GO:0004030];electron transfer activity [GO:0009055];glyceraldehyde-3-phosphate dehydrogenase (NAD+) (non-phosphorylating) activity [GO:0043878];NAD binding [GO:0051287]	GO:0004029;GO:0004030;GO:0005759;GO:0005975;GO:0006066;GO:0006068;GO:0006069;GO:0009055;GO:0043878;GO:0051287;GO:0070062
PAM	P19021	Peptidyl-glycine alpha-amidating monooxygenase;Peptidylglycine alpha-hydroxylating monooxygenase;Peptidyl-alpha-hydroxyglycine alpha-amidating lyase	6	8.4	108.33	133.21	1.99762	1.01926	24.2439	24.1929	24.4871	24.3048	24.2196	24.4376	24.7317	23.2694	23.3774	22.946	NaN	23.029	22.4168	central nervous system development [GO:0007417];fatty acid primary amide biosynthetic process [GO:0062112];heart development [GO:0007507];lactation [GO:0007595];limb development [GO:0060173];long-chain fatty acid metabolic process [GO:0001676];maternal process involved in female pregnancy [GO:0060135];odontogenesis [GO:0042476];ovulation cycle process [GO:0022602];peptide amidation [GO:0001519];p…	cell surface [GO:0009986];extracellular exosome [GO:0070062];extracellular region [GO:0005576];integral component of membrane [GO:0016021];membrane [GO:0016020];neuron projection [GO:0043005];perikaryon [GO:0043204];perinuclear region of cytoplasm [GO:0048471];plasma membrane [GO:0005886];secretory granule membrane [GO:0030667];trans-Golgi network [GO:0005802];transport vesicle membrane [GO:00306…	calcium ion binding [GO:0005509];copper ion binding [GO:0005507];L-ascorbic acid binding [GO:0031418];peptidylamidoglycolate lyase activity [GO:0004598];peptidylglycine monooxygenase activity [GO:0004504];protein kinase binding [GO:0019901];zinc ion binding [GO:0008270]	GO:0001519;GO:0001666;GO:0001676;GO:0004504;GO:0004598;GO:0005507;GO:0005509;GO:0005576;GO:0005802;GO:0005886;GO:0006357;GO:0007417;GO:0007507;GO:0007595;GO:0008270;GO:0009268;GO:0009404;GO:0009986;GO:0016020;GO:0016021;GO:0018032;GO:0019901;GO:0022602;GO:0030658;GO:0030667;GO:0031418;GO:0032355;GO:0032956;GO:0042476;GO:0042493;GO:0043005;GO:0043204;GO:0046688;GO:0048471;GO:0050708;GO:0051260;GO:…
SERINC1	Q9NRX5	Serine incorporator 1	2	6.6	50.494	169.84	1.78361	1.01409	25.3218	25.33	25.551	25.3448	25.1343	24.1442	25.2889	24.0668	24.7421	24.1211	23.9721	23.7228	22.9515	membrane biogenesis [GO:0044091];phosphatidylserine metabolic process [GO:0006658];phospholipid biosynthetic process [GO:0008654];positive regulation of CDP-diacylglycerol-serine O-phosphatidyltransferase activity [GO:1904219];positive regulation of serine C-palmitoyltransferase activity [GO:1904222];sphingolipid metabolic process [GO:0006665]	endoplasmic reticulum membrane [GO:0005789];integral component of membrane [GO:0016021];plasma membrane [GO:0005886]	enzyme binding [GO:0019899];protein binding, bridging [GO:0030674]	GO:0005789;GO:0005886;GO:0006658;GO:0006665;GO:0008654;GO:0016021;GO:0019899;GO:0030674;GO:0044091;GO:1904219;GO:1904222
DHX30	Q7L2E3	Putative ATP-dependent RNA helicase DHX30	16	14.6	133.94	85.385	4.027	1.00641	23.7727	23.5539	23.4809	24.0341	24.2286	23.864	22.753	23.2444	22.8164	23.2148	22.6936	22.6384	22.3512	central nervous system development [GO:0007417];mitochondrial large ribosomal subunit assembly [GO:1902775]	cytoplasm [GO:0005737];cytosol [GO:0005829];mitochondrial nucleoid [GO:0042645];mitochondrion [GO:0005739];nucleus [GO:0005634];ribonucleoprotein granule [GO:0035770]	3'-5' RNA helicase activity [GO:0034458];ATP binding [GO:0005524];chromatin binding [GO:0003682];DNA helicase activity [GO:0003678];double-stranded RNA binding [GO:0003725];G-quadruplex RNA binding [GO:0002151];RNA binding [GO:0003723];RNA helicase activity [GO:0003724]	GO:0002151;GO:0003678;GO:0003682;GO:0003723;GO:0003724;GO:0003725;GO:0005524;GO:0005634;GO:0005737;GO:0005739;GO:0005829;GO:0007417;GO:0034458;GO:0035770;GO:0042645;GO:1902775
CAPS	Q13938	Calcyphosin	4	16.4	30.24	4.3548	1.7093	0.99371	24.232	24.45	24.1227	25.1277	25.1468	25.3464	23.4292	NaN	24.5156	23.6384	NaN	23.3924	NaN	intracellular signal transduction [GO:0035556]	cytoplasm [GO:0005737];vesicle [GO:0031982]	calcium ion binding [GO:0005509]	GO:0005509;GO:0005737;GO:0031982;GO:0035556
ARSA	P15289	Arylsulfatase A;Arylsulfatase A component B;Arylsulfatase A component C	4	14	53.588	88.376	2.70337	0.984994	25.3099	24.727	25.6256	25.8344	25.9243	25.3358	25.1565	24.2384	24.9969	24.2479	23.9477	24.4625	24.2716	glycosphingolipid metabolic process [GO:0006687];neutrophil degranulation [GO:0043312]	azurophil granule lumen [GO:0035578];endoplasmic reticulum lumen [GO:0005788];extracellular exosome [GO:0070062];extracellular region [GO:0005576];lysosomal lumen [GO:0043202];lysosome [GO:0005764]	arylsulfatase activity [GO:0004065];calcium ion binding [GO:0005509];cerebroside-sulfatase activity [GO:0004098];sulfuric ester hydrolase activity [GO:0008484]	GO:0004065;GO:0004098;GO:0005509;GO:0005576;GO:0005764;GO:0005788;GO:0006687;GO:0008484;GO:0035578;GO:0043202;GO:0043312;GO:0070062
ABCB6	Q9NP58	ATP-binding cassette sub-family B member 6, mitochondrial	9	15.9	93.884	263.32	1.40668	0.984282	25.5721	25.466	25.8871	24.1607	24.6638	24.0724	23.1706	23.6494	25.1694	24.1475	24.1377	24.5209	23.107	brain development [GO:0007420];cellular iron ion homeostasis [GO:0006879];heme transport [GO:0015886];porphyrin-containing compound biosynthetic process [GO:0006779];skin development [GO:0043588];transmembrane transport [GO:0055085]	ATP-binding cassette (ABC) transporter complex [GO:0043190];cytosol [GO:0005829];endoplasmic reticulum [GO:0005783];endoplasmic reticulum membrane [GO:0005789];endosome [GO:0005768];endosome membrane [GO:0010008];extracellular exosome [GO:0070062];Golgi apparatus [GO:0005794];Golgi membrane [GO:0000139];integral component of membrane [GO:0016021];integral component of mitochondrial outer membrane…	ATPase activity [GO:0016887];ATPase-coupled heme transmembrane transporter activity [GO:0015439];ATPase-coupled transmembrane transporter activity [GO:0042626];ATP binding [GO:0005524];efflux transmembrane transporter activity [GO:0015562];heme binding [GO:0020037]	GO:0000139;GO:0005524;GO:0005654;GO:0005739;GO:0005740;GO:0005741;GO:0005768;GO:0005774;GO:0005783;GO:0005789;GO:0005794;GO:0005829;GO:0005886;GO:0006779;GO:0006879;GO:0007420;GO:0010008;GO:0015439;GO:0015562;GO:0015886;GO:0016021;GO:0016887;GO:0020037;GO:0031307;GO:0042626;GO:0043190;GO:0043588;GO:0055085;GO:0070062
OCC1	Q8TAD7	Overexpressed in colon carcinoma 1 protein	4	57.1	6.4069	94.641	3.05711	0.980297	23.5693	23.9648	24.2613	24.4361	24.1455	23.6779	NaN	23.2989	22.8415	NaN	22.9002	23.0747	NaN
SLC38A10	Q9HBR0	Putative sodium-coupled neutral amino acid transporter 10	18	23.3	119.76	237.46	2.55005	0.975052	24.8493	24.8672	24.6193	25.4965	25.0094	24.6873	24.4141	23.1223	24.5872	23.6821	24.1984	24.2215	23.3996	amino acid transmembrane transport [GO:0003333];bone development [GO:0060348];sodium ion transport [GO:0006814]	Golgi apparatus [GO:0005794];integral component of membrane [GO:0016021]	amino acid transmembrane transporter activity [GO:0015171]	GO:0003333;GO:0005794;GO:0006814;GO:0015171;GO:0016021;GO:0060348
APP	P05067	Amyloid beta A4 protein;N-APP;Soluble APP-alpha;Soluble APP-beta;C99;Beta-amyloid protein 42;Beta-amyloid protein 40;C83;P3(42);P3(40);C80;Gamma-secretase C-terminal fragment 59;Gamma-secretase C-terminal fragment 57;Gamma-secretase C-terminal fragment 50;C31	8	13.5	86.942	52.509	4.32084	0.964591	25.0795	25.2747	25.342	25.111	24.9483	24.8191	24.2887	24.1763	24.1126	24.0718	24.2611	24.5161	23.4917	activation of MAPK activity [GO:0000187];activation of MAPKKK activity [GO:0000185];adenylate cyclase-activating G protein-coupled receptor signaling pathway [GO:0007189];adenylate cyclase-inhibiting G protein-coupled receptor signaling pathway [GO:0007193];adult locomotory behavior [GO:0008344];amyloid fibril formation [GO:1990000];antibacterial humoral response [GO:0019731];antifungal humoral r…	amyloid-beta complex [GO:0106003];apical part of cell [GO:0045177];astrocyte projection [GO:0097449];axon [GO:0030424];cell [GO:0005623];cell-cell junction [GO:0005911];cell surface [GO:0009986];ciliary rootlet [GO:0035253];clathrin-coated pit [GO:0005905];COPII-coated ER to Golgi transport vesicle [GO:0030134];cytoplasm [GO:0005737];cytosol [GO:0005829];dendritic shaft [GO:0043198];dendritic spi…	acetylcholine receptor activator activity [GO:0030549];acetylcholine receptor binding [GO:0033130];amylin binding [GO:0097645];apolipoprotein binding [GO:0034185];chaperone binding [GO:0051087];chemoattractant activity [GO:0042056];DNA binding [GO:0003677];enzyme binding [GO:0019899];ephrin receptor binding [GO:0046875];frizzled binding [GO:0005109];G protein-coupled receptor binding [GO:0001664]…	GO:0000122;GO:0000185;GO:0000187;GO:0000979;GO:0001664;GO:0001774;GO:0001878;GO:0001934;GO:0001967;GO:0002265;GO:0002576;GO:0003677;GO:0004867;GO:0005102;GO:0005109;GO:0005158;GO:0005178;GO:0005576;GO:0005615;GO:0005623;GO:0005634;GO:0005641;GO:0005737;GO:0005739;GO:0005768;GO:0005769;GO:0005788;GO:0005790;GO:0005791;GO:0005794;GO:0005796;GO:0005798;GO:0005829;GO:0005886;GO:0005887;GO:0005905;GO:…
TMEM263	Q8WUH6	Transmembrane protein 263	4	41.4	11.748	84.666	1.35531	0.961042	28.0634	28.3984	28.7315	29.2246	28.52	29.1008	28.5069	26.0816	28.1915	28.2369	28.0667	28.2684	26.6327		integral component of membrane [GO:0016021]		GO:0016021
AKAP2	Q9Y2D5	A-kinase anchor protein 2	20	27.9	94.659	323.31	3.13084	0.954194	26.7763	26.9335	26.6436	26.2703	26.0537	25.9118	25.0337	25.6249	25.4945	25.8011	25.6293	25.7629	24.995
SNX16	P57768	Sorting nexin-16	2	7.6	39.166	74.665	2.77492	0.952196	24.1591	24.2859	24.1415	24.4807	24.3394	23.8046	23.833	22.6588	24.0103	23.4501	22.8466	22.9416	23.0072	early endosome to late endosome transport [GO:0045022];endosome to lysosome transport [GO:0008333];negative regulation of ATPase activity [GO:0032780];negative regulation of ion transport [GO:0043271];protein targeting to lysosome [GO:0006622];regulation of membrane potential [GO:0042391]	cytoplasm [GO:0005737];cytosol [GO:0005829];early endosome [GO:0005769];early endosome membrane [GO:0031901];extrinsic component of endosome membrane [GO:0031313];intracellular membrane-bounded organelle [GO:0043231];late endosome [GO:0005770];late endosome membrane [GO:0031902];lysosome [GO:0005764];plasma membrane [GO:0005886]	identical protein binding [GO:0042802];phosphatidylinositol binding [GO:0035091]	GO:0005737;GO:0005764;GO:0005769;GO:0005770;GO:0005829;GO:0005886;GO:0006622;GO:0008333;GO:0031313;GO:0031901;GO:0031902;GO:0032780;GO:0035091;GO:0042391;GO:0042802;GO:0043231;GO:0043271;GO:0045022
DPYSL2	Q16555	Dihydropyrimidinase-related protein 2	25	64.3	62.293	323.31	4.85078	0.948294	30.4184	30.7448	30.5044	30.903	30.9458	30.9141	29.6846	29.455	29.9181	29.9966	29.8676	30.0701	29.5389	axon guidance [GO:0007411];brain development [GO:0007420];cytoskeleton organization [GO:0007010];endocytosis [GO:0006897];nervous system development [GO:0007399];nucleobase-containing compound metabolic process [GO:0006139];regulation of axon extension [GO:0030516];signal transduction [GO:0007165]	cytoskeleton [GO:0005856];cytosol [GO:0005829];extracellular exosome [GO:0070062];plasma membrane [GO:0005886]	dihydropyrimidinase activity [GO:0004157];identical protein binding [GO:0042802];microtubule binding [GO:0008017]	GO:0004157;GO:0005829;GO:0005856;GO:0005886;GO:0006139;GO:0006897;GO:0007010;GO:0007165;GO:0007399;GO:0007411;GO:0007420;GO:0008017;GO:0030516;GO:0042802;GO:0070062
COL6A1	P12109	Collagen alpha-1(VI) chain	33	45.1	108.53	323.31	2.99811	0.948129	29.7655	29.8069	29.6316	29.7946	30.3656	30.1603	28.9136	28.2518	29.1983	29.426	29.5056	28.9517	28.5615	cell adhesion [GO:0007155];cellular response to amino acid stimulus [GO:0071230];endodermal cell differentiation [GO:0035987];extracellular matrix organization [GO:0030198];growth plate cartilage chondrocyte morphogenesis [GO:0003429];osteoblast differentiation [GO:0001649];protein heterotrimerization [GO:0070208]	collagen-containing extracellular matrix [GO:0062023];collagen type VI trimer [GO:0005589];endoplasmic reticulum lumen [GO:0005788];extracellular exosome [GO:0070062];extracellular matrix [GO:0031012];extracellular region [GO:0005576];extracellular space [GO:0005615];lysosomal membrane [GO:0005765];membrane [GO:0016020];protein-containing complex [GO:0032991];sarcolemma [GO:0042383]	extracellular matrix structural constituent conferring tensile strength [GO:0030020];platelet-derived growth factor binding [GO:0048407]	GO:0001649;GO:0003429;GO:0005576;GO:0005589;GO:0005615;GO:0005765;GO:0005788;GO:0007155;GO:0016020;GO:0030020;GO:0030198;GO:0031012;GO:0032991;GO:0035987;GO:0042383;GO:0048407;GO:0062023;GO:0070062;GO:0070208;GO:0071230
NPEPL1	Q8NDH3	Probable aminopeptidase NPEPL1	5	9.4	55.86	24.82	1.43342	0.948061	24.4162	25.6961	25.1395	25.9947	25.704	25.2717	24.6138	24.2733	25.348	23.34	NaN	24.5363	NaN		cytoplasm [GO:0005737];nucleus [GO:0005634]	aminopeptidase activity [GO:0004177];manganese ion binding [GO:0030145];metalloexopeptidase activity [GO:0008235]	GO:0004177;GO:0005634;GO:0005737;GO:0008235;GO:0030145
SH3PXD2B	A1X283	SH3 and PX domain-containing protein 2B	14	21.6	101.58	228.93	2.96071	0.930998	25.6399	25.7795	26.0122	26.2748	26.1897	26.3177	24.9532	24.5744	25.8296	25.2464	25.359	25.2086	24.5612	adipose tissue development [GO:0060612];bone development [GO:0060348];cranial skeletal system development [GO:1904888];extracellular matrix disassembly [GO:0022617];eye development [GO:0001654];heart development [GO:0007507];osteoblast fate commitment [GO:0002051];podosome assembly [GO:0071800];positive regulation of adipose tissue development [GO:1904179];positive regulation of fat cell differen…	cell junction [GO:0030054];cell projection [GO:0042995];cytoplasm [GO:0005737];podosome [GO:0002102]	phosphatidylinositol-3,5-bisphosphate binding [GO:0080025];phosphatidylinositol-3-phosphate binding [GO:0032266];phosphatidylinositol-4-phosphate binding [GO:0070273];phosphatidylinositol-5-phosphate binding [GO:0010314];phosphatidylinositol binding [GO:0035091];SH2 domain binding [GO:0042169];superoxide-generating NADPH oxidase activator activity [GO:0016176]	GO:0001501;GO:0001654;GO:0002051;GO:0002102;GO:0005737;GO:0006801;GO:0007507;GO:0010314;GO:0010628;GO:0016176;GO:0022617;GO:0030054;GO:0032266;GO:0035091;GO:0040018;GO:0042169;GO:0042995;GO:0045600;GO:0048705;GO:0051496;GO:0060348;GO:0060378;GO:0060612;GO:0070273;GO:0071800;GO:0072657;GO:0080025;GO:1904179;GO:1904888
FLRT2	O43155	Leucine-rich repeat transmembrane protein FLRT2	7	14.2	74.048	32.81	2.23497	0.930541	24.6218	25.0411	24.6493	25.2877	25.7141	24.9074	23.8766	23.4913	24.616	23.6323	24.6312	24.3906	NaN	axon guidance [GO:0007411];basement membrane organization [GO:0071711];cell adhesion involved in heart morphogenesis [GO:0061343];fibroblast growth factor receptor signaling pathway [GO:0008543];heart morphogenesis [GO:0003007];positive regulation of synapse assembly [GO:0051965];regulation of neuron migration [GO:2001222]	cell-cell junction [GO:0005911];endoplasmic reticulum membrane [GO:0005789];extracellular exosome [GO:0070062];extracellular matrix [GO:0031012];focal adhesion [GO:0005925];integral component of plasma membrane [GO:0005887];neuron projection [GO:0043005];plasma membrane [GO:0005886];synapse [GO:0045202]	chemorepellent activity [GO:0045499];fibroblast growth factor receptor binding [GO:0005104];protein binding, bridging [GO:0030674]	GO:0003007;GO:0005104;GO:0005789;GO:0005886;GO:0005887;GO:0005911;GO:0005925;GO:0007411;GO:0008543;GO:0030674;GO:0031012;GO:0043005;GO:0045202;GO:0045499;GO:0051965;GO:0061343;GO:0070062;GO:0071711;GO:2001222
DDAH1	O94760	N(G),N(G)-dimethylarginine dimethylaminohydrolase 1	10	38.9	31.121	187.2	3.48477	0.924292	28.2389	28.0831	28.017	28.6439	28.5457	28.2624	27.7142	27.6921	27.4825	27.175	26.6274	27.4728	27.4554	arginine catabolic process [GO:0006527];arginine metabolic process [GO:0006525];citrulline metabolic process [GO:0000052];negative regulation of cell population proliferation [GO:0008285];negative regulation of cellular response to hypoxia [GO:1900038];negative regulation of vascular permeability [GO:0043116];nitric oxide mediated signal transduction [GO:0007263];positive regulation of angiogenes…	cytosol [GO:0005829];extracellular exosome [GO:0070062]	amino acid binding [GO:0016597];catalytic activity [GO:0003824];dimethylargininase activity [GO:0016403];metal ion binding [GO:0046872]	GO:0000052;GO:0003073;GO:0003824;GO:0005829;GO:0006525;GO:0006527;GO:0007263;GO:0008285;GO:0016403;GO:0016597;GO:0043116;GO:0045429;GO:0045766;GO:0046872;GO:0050999;GO:0070062;GO:1900038
COQ6	Q9Y2Z9	Ubiquinone biosynthesis monooxygenase COQ6, mitochondrial	4	9.6	50.869	4.2157	2.8756	0.924186	23.2945	23.3052	23.507	24.1356	23.4487	23.8128	22.4464	23.0525	NaN	NaN	22.3634	23.0042	22.4324	ubiquinone biosynthetic process [GO:0006744]	cell projection [GO:0042995];extrinsic component of mitochondrial inner membrane [GO:0031314];Golgi apparatus [GO:0005794];mitochondrion [GO:0005739]	FAD binding [GO:0071949];oxidoreductase activity [GO:0016491];oxidoreductase activity, acting on paired donors, with incorporation or reduction of molecular oxygen, NAD(P)H as one donor, and incorporation of one atom of oxygen [GO:0016709];oxidoreductase activity, acting on paired donors, with incorporation or reduction of molecular oxygen, reduced flavin or flavoprotein as one donor, and incorpo…	GO:0005739;GO:0005794;GO:0006744;GO:0016491;GO:0016709;GO:0016712;GO:0031314;GO:0042995;GO:0071949
GDI1	P31150	Rab GDP dissociation inhibitor alpha	22	59.7	50.582	212.85	3.57045	0.92292	26.0256	25.4144	26.5003	26.0837	25.7167	25.4023	25.0913	25.1869	24.6989	24.8643	24.9064	24.782	25.0101	negative regulation of axonogenesis [GO:0050771];negative regulation of protein targeting to membrane [GO:0090315];positive regulation of axon extension [GO:0045773];protein transport [GO:0015031];Rab protein signal transduction [GO:0032482];regulation of small GTPase mediated signal transduction [GO:0051056];response to calcium ion [GO:0051592];signal transduction [GO:0007165];vesicle-mediated t…	axon [GO:0030424];cytoplasm [GO:0005737];cytosol [GO:0005829];Golgi apparatus [GO:0005794];midbody [GO:0030496];myelin sheath [GO:0043209];neuronal cell body [GO:0043025];protein-containing complex [GO:0032991]	GDP-dissociation inhibitor activity [GO:0005092];GTPase activator activity [GO:0005096];Rab GDP-dissociation inhibitor activity [GO:0005093];Rab GTPase binding [GO:0017137]	GO:0005092;GO:0005093;GO:0005096;GO:0005737;GO:0005794;GO:0005829;GO:0007165;GO:0015031;GO:0016192;GO:0017137;GO:0030424;GO:0030496;GO:0032482;GO:0032991;GO:0043025;GO:0043209;GO:0045773;GO:0050771;GO:0051056;GO:0051592;GO:0090315
VASN	Q6EMK4	Vasorin	8	13.5	71.712	101.09	1.70201	0.922792	26.5985	26.5996	26.7005	27.9113	28.1301	27.7307	25.6022	25.8225	26.7653	26.4499	26.3674	27.0335	26.4487	cellular response to hypoxia [GO:0071456];cellular response to redox state [GO:0071461];negative regulation of epithelial to mesenchymal transition [GO:0010719];negative regulation of transforming growth factor beta receptor signaling pathway [GO:0030512]	cell surface [GO:0009986];extracellular exosome [GO:0070062];extracellular matrix [GO:0031012];extracellular space [GO:0005615];integral component of membrane [GO:0016021];lysosomal membrane [GO:0005765];mitochondrion [GO:0005739];plasma membrane [GO:0005886]	cadherin binding [GO:0045296];transforming growth factor beta binding [GO:0050431]	GO:0005615;GO:0005739;GO:0005765;GO:0005886;GO:0009986;GO:0010719;GO:0016021;GO:0030512;GO:0031012;GO:0045296;GO:0050431;GO:0070062;GO:0071456;GO:0071461
PRCP	P42785	Lysosomal Pro-X carboxypeptidase	6	18.1	55.799	55.319	3.01798	0.916531	27.7632	27.5053	27.2451	26.6999	26.8056	27.3762	25.8404	26.3134	26.3975	26.5221	26.6005	26.6539	25.8843	angiogenesis involved in wound healing [GO:0060055];blood coagulation, intrinsic pathway [GO:0007597];energy homeostasis [GO:0097009];glucose homeostasis [GO:0042593];negative regulation of systemic arterial blood pressure [GO:0003085];neutrophil degranulation [GO:0043312];plasma kallikrein-kinin cascade [GO:0002353];proteolysis [GO:0006508];regulation of blood vessel endothelial cell migration […	azurophil granule membrane [GO:0035577];basal part of cell [GO:0045178];extracellular exosome [GO:0070062];ficolin-1-rich granule membrane [GO:0101003];plasma membrane [GO:0005886]	dipeptidyl-peptidase activity [GO:0008239];serine-type carboxypeptidase activity [GO:0004185]	GO:0002155;GO:0002353;GO:0003085;GO:0004185;GO:0005886;GO:0006508;GO:0007597;GO:0008239;GO:0035577;GO:0042593;GO:0043312;GO:0043535;GO:0045178;GO:0060055;GO:0070062;GO:0097009;GO:0101003;GO:2000377
CD109	Q6YHK3	CD109 antigen	16	14.3	161.69	159.76	1.68857	0.916104	24.3967	24.2386	24.4059	24.5242	24.4845	24.4912	24.332	22.4389	23.8332	24.0194	23.7891	23.8976	22.2418	hair follicle development [GO:0001942];negative regulation of keratinocyte proliferation [GO:0010839];negative regulation of protein phosphorylation [GO:0001933];negative regulation of transforming growth factor beta receptor signaling pathway [GO:0030512];negative regulation of wound healing [GO:0061045];osteoclast fusion [GO:0072675];platelet degranulation [GO:0002576];regulation of keratinocyt…	anchored component of membrane [GO:0031225];cell surface [GO:0009986];extracellular region [GO:0005576];extracellular space [GO:0005615];plasma membrane [GO:0005886];platelet alpha granule membrane [GO:0031092]	serine-type endopeptidase inhibitor activity [GO:0004867];transforming growth factor beta binding [GO:0050431]	GO:0001933;GO:0001942;GO:0002576;GO:0004867;GO:0005576;GO:0005615;GO:0005886;GO:0009986;GO:0010839;GO:0030512;GO:0031092;GO:0031225;GO:0045616;GO:0050431;GO:0061045;GO:0072675
SASH1	O94885	SAM and SH3 domain-containing protein 1	13	16	136.65	134.72	2.0721	0.913127	24.3165	24.5248	24.5373	24.9158	25.0022	24.7372	24.0102	23.4038	24.4357	23.9757	23.9072	24.1281	22.4535	positive regulation of angiogenesis [GO:0045766];positive regulation of endothelial cell migration [GO:0010595];positive regulation of JUN kinase activity [GO:0043507];positive regulation of lipopolysaccharide-mediated signaling pathway [GO:0031666];positive regulation of NIK/NF-kappaB signaling [GO:1901224];positive regulation of p38MAPK cascade [GO:1900745];protein polyubiquitination [GO:000020…	protein-containing complex [GO:0032991]	mitogen-activated protein kinase kinase kinase binding [GO:0031435];molecular adaptor activity [GO:0060090];protein C-terminus binding [GO:0008022];protein kinase binding [GO:0019901]	GO:0000209;GO:0008022;GO:0010595;GO:0019901;GO:0031435;GO:0031666;GO:0032991;GO:0043507;GO:0045766;GO:0060090;GO:1900044;GO:1900745;GO:1901224;GO:1902498
MAPK7	Q13164	Mitogen-activated protein kinase 7	11	18.9	88.385	62.768	4.54852	0.906326	24.6444	24.7818	24.7804	24.8085	25.179	24.7959	23.9643	23.5124	24.0761	24.3198	23.8091	24.1185	23.6772	axon guidance [GO:0007411];cAMP-mediated signaling [GO:0019933];cell cycle [GO:0007049];cellular response to growth factor stimulus [GO:0071363];cellular response to hydrogen peroxide [GO:0070301];cellular response to laminar fluid shear stress [GO:0071499];cellular response to organic substance [GO:0071310];cellular response to transforming growth factor beta stimulus [GO:0071560];intracellular …	cytoplasm [GO:0005737];cytosol [GO:0005829];nucleoplasm [GO:0005654];nucleus [GO:0005634];PML body [GO:0016605]	ATP binding [GO:0005524];MAP kinase activity [GO:0004707];mitogen-activated protein kinase binding [GO:0051019]	GO:0004707;GO:0005524;GO:0005634;GO:0005654;GO:0005737;GO:0005829;GO:0007049;GO:0007165;GO:0007411;GO:0010468;GO:0016605;GO:0018105;GO:0019933;GO:0034115;GO:0035556;GO:0036003;GO:0045765;GO:0045944;GO:0050728;GO:0051019;GO:0051247;GO:0051344;GO:0060761;GO:0070301;GO:0070885;GO:0071310;GO:0071363;GO:0071499;GO:0071560;GO:1902176;GO:2000352;GO:2001240
MTHFD1L	Q6UB35	Monofunctional C1-tetrahydrofolate synthase, mitochondrial	18	22.1	105.79	24.535	3.22278	0.903332	26.1768	26.2158	26.3276	26.9989	27.0952	27.2438	25.6865	25.6479	25.9284	25.904	25.6676	25.8976	25.679	10-formyltetrahydrofolate biosynthetic process [GO:0009257];embryonic neurocranium morphogenesis [GO:0048702];embryonic viscerocranium morphogenesis [GO:0048703];folic acid-containing compound metabolic process [GO:0006760];folic acid metabolic process [GO:0046655];formate metabolic process [GO:0015942];neural tube closure [GO:0001843];purine nucleobase biosynthetic process [GO:0009113];tetrahydr…	cytoplasm [GO:0005737];membrane [GO:0016020];mitochondrial matrix [GO:0005759];mitochondrion [GO:0005739]	ATP binding [GO:0005524];formate-tetrahydrofolate ligase activity [GO:0004329];methylenetetrahydrofolate dehydrogenase (NADP+) activity [GO:0004488];protein homodimerization activity [GO:0042803]	GO:0001843;GO:0004329;GO:0004488;GO:0005524;GO:0005737;GO:0005739;GO:0005759;GO:0006760;GO:0009113;GO:0009257;GO:0015942;GO:0016020;GO:0035999;GO:0042803;GO:0046655;GO:0048702;GO:0048703
ATP6AP2	O75787	Renin receptor	6	21.4	39.008	18.851	3.22768	0.888845	24.1812	24.4371	24.5262	24.437	24.5862	24.1679	24.2171	23.2822	23.8077	23.5823	22.9887	23.5255	23.0993	angiotensin maturation [GO:0002003];eye pigmentation [GO:0048069];head morphogenesis [GO:0060323];neutrophil degranulation [GO:0043312];positive regulation of transforming growth factor beta1 production [GO:0032914];positive regulation of Wnt signaling pathway [GO:0030177];regulation of MAPK cascade [GO:0043408];rostrocaudal neural tube patterning [GO:0021903]	apical plasma membrane [GO:0016324];cell body [GO:0044297];endoplasmic reticulum membrane [GO:0005789];external side of plasma membrane [GO:0009897];extracellular exosome [GO:0070062];ficolin-1-rich granule membrane [GO:0101003];integral component of membrane [GO:0016021];lysosome [GO:0005764];neuron projection [GO:0043005];plasma membrane [GO:0005886];tertiary granule membrane [GO:0070821];vacuo…	signaling receptor activity [GO:0038023]	GO:0002003;GO:0005764;GO:0005789;GO:0005886;GO:0009897;GO:0016021;GO:0016324;GO:0016471;GO:0021903;GO:0030177;GO:0032914;GO:0038023;GO:0043005;GO:0043312;GO:0043408;GO:0044297;GO:0048069;GO:0060323;GO:0070062;GO:0070821;GO:0101003
MYH10	P35580	Myosin-10	90	45	229	323.31	2.59985	0.881935	28.1277	28.1623	28.2093	27.3291	27.1631	27.1779	26.5922	27.1281	26.6505	26.9945	26.8969	27.0585	26.37	actin filament-based movement [GO:0030048];actomyosin structure organization [GO:0031032];adult heart development [GO:0007512];aorta development [GO:0035904];axon guidance [GO:0007411];cardiac myofibril assembly [GO:0055003];cardiac septum development [GO:0003279];cell adhesion [GO:0007155];cell population proliferation [GO:0008283];cerebellar Purkinje cell layer development [GO:0021680];coronary…	actomyosin [GO:0042641];brush border [GO:0005903];cell cortex [GO:0005938];cleavage furrow [GO:0032154];cytoplasm [GO:0005737];cytosol [GO:0005829];dendritic spine [GO:0043197];extracellular exosome [GO:0070062];glutamatergic synapse [GO:0098978];growth cone [GO:0030426];lamellipodium [GO:0030027];midbody [GO:0030496];myosin complex [GO:0016459];myosin II complex [GO:0016460];myosin II filament […	actin binding [GO:0003779];actin-dependent ATPase activity [GO:0030898];actin filament binding [GO:0051015];ADP binding [GO:0043531];ATPase activity [GO:0016887];ATP binding [GO:0005524];calmodulin binding [GO:0005516];microfilament motor activity [GO:0000146];mRNA 5'-UTR binding [GO:0048027];RNA stem-loop binding [GO:0035613]	GO:0000146;GO:0000281;GO:0001701;GO:0001725;GO:0001764;GO:0001778;GO:0003279;GO:0003779;GO:0005516;GO:0005524;GO:0005634;GO:0005737;GO:0005819;GO:0005829;GO:0005844;GO:0005903;GO:0005938;GO:0006887;GO:0006930;GO:0007097;GO:0007155;GO:0007411;GO:0007512;GO:0008283;GO:0008360;GO:0016459;GO:0016460;GO:0016887;GO:0021592;GO:0021670;GO:0021678;GO:0021680;GO:0030027;GO:0030048;GO:0030426;GO:0030496;GO:…
ATP2B4	P23634	Plasma membrane calcium-transporting ATPase 4	34	32	137.92	323.31	3.65394	0.880504	28.6443	28.48	28.6616	28.6396	28.4553	28.4106	27.8794	28.0545	27.413	27.6382	26.9993	27.6041	28.088	calcium ion export [GO:1901660];calcium ion import across plasma membrane [GO:0098703];calcium ion transmembrane import into cytosol [GO:0097553];calcium ion transmembrane transport [GO:0070588];cellular calcium ion homeostasis [GO:0006874];cellular response to acetylcholine [GO:1905145];cellular response to epinephrine stimulus [GO:0071872];flagellated sperm motility [GO:0030317];hippocampus dev…	basolateral plasma membrane [GO:0016323];caveola [GO:0005901];glutamatergic synapse [GO:0098978];integral component of plasma membrane [GO:0005887];integral component of presynaptic active zone membrane [GO:0099059];membrane [GO:0016020];neuron projection [GO:0043005];plasma membrane [GO:0005886];protein-containing complex [GO:0032991];sperm flagellum [GO:0036126];sperm principal piece [GO:009722…	ATP binding [GO:0005524];calcium transmembrane transporter activity, phosphorylative mechanism [GO:0005388];calmodulin binding [GO:0005516];metal ion binding [GO:0046872];nitric-oxide synthase binding [GO:0050998];nitric-oxide synthase inhibitor activity [GO:0036487];PDZ domain binding [GO:0030165];protein kinase binding [GO:0019901];protein phosphatase 2B binding [GO:0030346];scaffold protein bi…	GO:0003407;GO:0005388;GO:0005516;GO:0005524;GO:0005886;GO:0005887;GO:0005901;GO:0006357;GO:0006874;GO:0007283;GO:0010751;GO:0014832;GO:0016020;GO:0016323;GO:0019901;GO:0021766;GO:0030018;GO:0030165;GO:0030315;GO:0030317;GO:0030346;GO:0032991;GO:0033138;GO:0034220;GO:0036126;GO:0036487;GO:0043005;GO:0045019;GO:0046872;GO:0050998;GO:0051001;GO:0051480;GO:0051599;GO:0070588;GO:0070885;GO:0071872;GO:…
PVRL2	Q92692	Nectin-2	5	9.9	57.741	7.934	2.90634	0.873658	25.5419	25.4671	25.9256	NaN	25.0834	NaN	24.7573	24.6382	24.7215	24.9371	24.0532	24.599	24.7099	acrosome assembly [GO:0001675];adherens junction organization [GO:0034332];adhesion of symbiont to host [GO:0044406];cell part morphogenesis [GO:0032990];cilium organization [GO:0044782];coreceptor-mediated virion attachment to host cell [GO:0046814];cytoskeleton organization [GO:0007010];establishment of mitochondrion localization [GO:0051654];fertilization [GO:0009566];fusion of virus membrane …	cell-cell contact zone [GO:0044291];cell-cell junction [GO:0005911];cell surface [GO:0009986];extracellular exosome [GO:0070062];focal adhesion [GO:0005925];integral component of membrane [GO:0016021];plasma membrane [GO:0005886];zonula adherens [GO:0005915]	cell adhesion molecule binding [GO:0050839];coreceptor activity [GO:0015026];identical protein binding [GO:0042802];protein homodimerization activity [GO:0042803];virus receptor activity [GO:0001618]	GO:0001618;GO:0001675;GO:0002860;GO:0002891;GO:0005886;GO:0005911;GO:0005915;GO:0005925;GO:0007010;GO:0007156;GO:0007286;GO:0007289;GO:0009566;GO:0009986;GO:0015026;GO:0016021;GO:0019064;GO:0030382;GO:0032990;GO:0033005;GO:0034332;GO:0042271;GO:0042802;GO:0042803;GO:0044291;GO:0044406;GO:0044782;GO:0045954;GO:0046596;GO:0046814;GO:0050776;GO:0050839;GO:0050862;GO:0051654;GO:0060370;GO:0070062
CDK4	P11802	Cyclin-dependent kinase 4	7	30	33.729	51.849	3.18602	0.860409	24.3716	24.7163	24.5882	24.462	24.1286	24.4811	24.4411	23.4742	23.2245	23.4432	23.3776	23.4485	23.7738	adipose tissue development [GO:0060612];animal organ regeneration [GO:0031100];cell division [GO:0051301];cellular response to insulin stimulus [GO:0032869];cellular response to interleukin-4 [GO:0071353];cellular response to ionomycin [GO:1904637];cellular response to lipopolysaccharide [GO:0071222];cellular response to phorbol 13-acetate 12-myristate [GO:1904628];circadian rhythm [GO:0007623];G…	bicellular tight junction [GO:0005923];chromatin [GO:0000785];cyclin D2-CDK4 complex [GO:0097129];cyclin-dependent protein kinase holoenzyme complex [GO:0000307];cytosol [GO:0005829];nuclear membrane [GO:0031965];nucleolus [GO:0005730];nucleoplasm [GO:0005654];nucleus [GO:0005634];perinuclear region of cytoplasm [GO:0048471];transcription factor complex [GO:0005667]	ATP binding [GO:0005524];cyclin binding [GO:0030332];cyclin-dependent protein serine/threonine kinase activity [GO:0004693];cyclin-dependent protein serine/threonine kinase regulator activity [GO:0016538];protein-containing complex binding [GO:0044877]	GO:0000082;GO:0000307;GO:0000785;GO:0002088;GO:0004693;GO:0005524;GO:0005634;GO:0005654;GO:0005667;GO:0005730;GO:0005829;GO:0005923;GO:0006367;GO:0006468;GO:0007165;GO:0007623;GO:0008284;GO:0009636;GO:0010288;GO:0010468;GO:0010971;GO:0016538;GO:0030332;GO:0031100;GO:0031965;GO:0032869;GO:0033574;GO:0040014;GO:0042493;GO:0043065;GO:0044877;GO:0045727;GO:0045787;GO:0045793;GO:0046626;GO:0046890;GO:…
RAPH1	Q70E73	Ras-associated and pleckstrin homology domains-containing protein 1	5	8.3	135.25	39.572	1.65453	0.854204	24.8685	25.2249	25.1609	25.8762	26.1462	25.452	25.2321	23.2525	24.7066	24.9502	24.632	24.9865	24.4441	axon extension [GO:0048675];signal transduction [GO:0007165]	cytoskeleton [GO:0005856];cytosol [GO:0005829];filopodium [GO:0030175];lamellipodium [GO:0030027];nuclear body [GO:0016604];plasma membrane [GO:0005886]		GO:0005829;GO:0005856;GO:0005886;GO:0007165;GO:0016604;GO:0030027;GO:0030175;GO:0048675
DDAH2	O95865	N(G),N(G)-dimethylarginine dimethylaminohydrolase 2	11	47	29.644	173.67	3.01201	0.853559	27.5535	27.7329	27.4832	28.1859	28.2786	28.2718	27.1367	27.402	26.6772	26.9771	26.6165	27.4049	27.2343	arginine catabolic process [GO:0006527];arginine metabolic process [GO:0006525];citrulline metabolic process [GO:0000052];negative regulation of apoptotic process [GO:0043066];nitric oxide biosynthetic process [GO:0006809];nitric oxide mediated signal transduction [GO:0007263];positive regulation of nitric oxide biosynthetic process [GO:0045429];regulation of nitric-oxide synthase activity [GO:00…	cytosol [GO:0005829];extracellular exosome [GO:0070062];microtubule organizing center [GO:0005815];mitochondrion [GO:0005739]	amino acid binding [GO:0016597];catalytic activity [GO:0003824];dimethylargininase activity [GO:0016403]	GO:0000052;GO:0003824;GO:0005739;GO:0005815;GO:0005829;GO:0006525;GO:0006527;GO:0006809;GO:0007263;GO:0016403;GO:0016597;GO:0043066;GO:0045429;GO:0050999;GO:0070062
STOM	P27105	Erythrocyte band 7 integral membrane protein	10	44.4	31.73	323.31	2.95593	0.85307	29.5436	29.6524	29.6376	29.1895	28.7689	28.6676	28.2566	28.7008	28.5011	28.6845	28.0101	28.2819	28.2964	neutrophil degranulation [GO:0043312];positive regulation by host of viral genome replication [GO:0044829];positive regulation of protein targeting to membrane [GO:0090314];protein homooligomerization [GO:0051260];regulation of acid-sensing ion channel activity [GO:1901585]	azurophil granule membrane [GO:0035577];blood microparticle [GO:0072562];cytoskeleton [GO:0005856];endoplasmic reticulum [GO:0005783];extracellular exosome [GO:0070062];extracellular space [GO:0005615];integral component of plasma membrane [GO:0005887];melanosome [GO:0042470];membrane [GO:0016020];membrane raft [GO:0045121];mitochondrion [GO:0005739];perinuclear region of cytoplasm [GO:0048471];p…	protein homodimerization activity [GO:0042803];RNA polymerase binding [GO:0070063]	GO:0005615;GO:0005739;GO:0005783;GO:0005856;GO:0005886;GO:0005887;GO:0016020;GO:0031982;GO:0035577;GO:0035579;GO:0042470;GO:0042803;GO:0043312;GO:0044829;GO:0045121;GO:0048471;GO:0051260;GO:0070062;GO:0070063;GO:0070821;GO:0072562;GO:0090314;GO:1901585
CAV1	Q03135	Caveolin-1	5	23.6	20.471	121.85	2.30123	0.852943	28.9472	28.8443	29.379	29.5659	29.8587	29.702	28.6186	29.3773	28.5756	28.5307	27.8464	28.2523	28.5083	angiogenesis [GO:0001525];angiotensin-activated signaling pathway involved in heart process [GO:0086098];apoptotic signaling pathway [GO:0097190];basement membrane organization [GO:0071711];beta-catenin destruction complex disassembly [GO:1904886];calcium ion homeostasis [GO:0055074];calcium ion transport [GO:0006816];caveola assembly [GO:0070836];caveolin-mediated endocytosis [GO:0072584];cell d…	acrosomal membrane [GO:0002080];apical plasma membrane [GO:0016324];basolateral plasma membrane [GO:0016323];caveola [GO:0005901];caveolar macromolecular signaling complex [GO:0002095];cell cortex [GO:0005938];cilium [GO:0005929];cytoplasmic vesicle [GO:0031410];early endosome membrane [GO:0031901];endocytic vesicle membrane [GO:0030666];endoplasmic reticulum [GO:0005783];endoplasmic reticulum me…	ATPase binding [GO:0051117];cholesterol binding [GO:0015485];enzyme binding [GO:0019899];identical protein binding [GO:0042802];inward rectifier potassium channel inhibitor activity [GO:0070320];ion channel binding [GO:0044325];molecular adaptor activity [GO:0060090];nitric-oxide synthase binding [GO:0050998];patched binding [GO:0005113];peptidase activator activity [GO:0016504];protein binding, …	GO:0000122;GO:0000139;GO:0000188;GO:0001525;GO:0001570;GO:0001666;GO:0001937;GO:0001960;GO:0002080;GO:0002095;GO:0002931;GO:0003057;GO:0005102;GO:0005113;GO:0005198;GO:0005768;GO:0005783;GO:0005789;GO:0005794;GO:0005811;GO:0005886;GO:0005887;GO:0005901;GO:0005925;GO:0005929;GO:0005938;GO:0006641;GO:0006816;GO:0006874;GO:0006940;GO:0007519;GO:0007595;GO:0008104;GO:0009267;GO:0009617;GO:0010524;GO:…
BIN1	O00499	Myc box-dependent-interacting protein 1	7	16.4	64.699	259.5	3.46051	0.846163	25.9266	25.6918	25.9369	25.4912	25.4374	25.6617	24.346	24.6499	24.9232	24.5465	25.0288	25.4057	25.0135	cytoskeleton organization [GO:0007010];endocytosis [GO:0006897];endosome to lysosome transport [GO:0008333];lipid tube assembly [GO:0060988];membrane organization [GO:0061024];negative regulation of amyloid-beta formation [GO:1902430];negative regulation of aspartic-type endopeptidase activity involved in amyloid precursor protein catabolic process [GO:1902960];negative regulation of calcium ion …	actin cytoskeleton [GO:0015629];axon [GO:0030424];axon initial segment [GO:0043194];cytoplasm [GO:0005737];cytosol [GO:0005829];endosome [GO:0005768];I band [GO:0031674];lipid tube [GO:0060987];membrane [GO:0016020];node of Ranvier [GO:0033268];nuclear envelope [GO:0005635];nucleus [GO:0005634];plasma membrane [GO:0005886];synaptic vesicle [GO:0008021];T-tubule [GO:0030315];Z disc [GO:0030018]	actin filament binding [GO:0051015];chaperone binding [GO:0051087];clathrin binding [GO:0030276];identical protein binding [GO:0042802];phospholipid binding [GO:0005543];protease binding [GO:0002020];RNA polymerase binding [GO:0070063];tau protein binding [GO:0048156]	GO:0002020;GO:0005543;GO:0005634;GO:0005635;GO:0005737;GO:0005768;GO:0005829;GO:0005886;GO:0006897;GO:0006997;GO:0007010;GO:0008021;GO:0008333;GO:0015629;GO:0016020;GO:0016032;GO:0030018;GO:0030100;GO:0030276;GO:0030315;GO:0030424;GO:0030838;GO:0031674;GO:0033268;GO:0033292;GO:0042802;GO:0043065;GO:0043194;GO:0045664;GO:0048156;GO:0048711;GO:0051015;GO:0051087;GO:0051647;GO:0060987;GO:0060988;GO:…
SSH1	Q8WYL5	Protein phosphatase Slingshot homolog 1	6	9.5	115.51	11.645	2.91195	0.839035	23.992	24.1104	23.5156	23.9609	23.4042	23.7809	23.7523	22.44	22.9115	23.0246	22.873	22.7831	22.9001	actin cytoskeleton organization [GO:0030036];cell morphogenesis [GO:0000902];cellular response to ATP [GO:0071318];excitatory chemical synaptic transmission [GO:0098976];positive regulation of AMPA glutamate receptor clustering [GO:1904719];positive regulation of excitatory postsynaptic potential [GO:2000463];positive regulation of neuron death [GO:1901216];positive regulation of synaptic plastic…	cleavage furrow [GO:0032154];cytoplasm [GO:0005737];cytoskeleton [GO:0005856];cytosol [GO:0005829];growth cone [GO:0030426];lamellipodium [GO:0030027];midbody [GO:0030496];plasma membrane [GO:0005886]	actin binding [GO:0003779];phosphoprotein phosphatase activity [GO:0004721];protein tyrosine/serine/threonine phosphatase activity [GO:0008138];protein tyrosine phosphatase activity [GO:0004725]	GO:0000902;GO:0003779;GO:0004721;GO:0004725;GO:0005737;GO:0005829;GO:0005856;GO:0005886;GO:0006470;GO:0008138;GO:0030027;GO:0030036;GO:0030426;GO:0030496;GO:0031915;GO:0032154;GO:0032268;GO:0071318;GO:0098976;GO:1901216;GO:1904719;GO:1904754;GO:2000463
ADAM10	O14672	Disintegrin and metalloproteinase domain-containing protein 10	11	16.8	84.141	110.43	4.1126	0.835691	25.6748	25.9507	25.9744	26.1478	25.9402	26.2581	25.2923	25.0821	25.4239	25.2046	24.7709	25.4881	24.8252	amyloid-beta formation [GO:0034205];amyloid precursor protein catabolic process [GO:0042987];cell-cell signaling [GO:0007267];cellular protein metabolic process [GO:0044267];cochlea development [GO:0090102];constitutive protein ectodomain proteolysis [GO:0051089];extracellular matrix disassembly [GO:0022617];integrin-mediated signaling pathway [GO:0007229];in utero embryonic development [GO:00017…	cell surface [GO:0009986];cytoplasm [GO:0005737];dendritic spine [GO:0043197];endoplasmic reticulum lumen [GO:0005788];extracellular exosome [GO:0070062];focal adhesion [GO:0005925];glutamatergic synapse [GO:0098978];Golgi apparatus [GO:0005794];Golgi-associated vesicle [GO:0005798];Golgi membrane [GO:0000139];integral component of membrane [GO:0016021];membrane [GO:0016020];neuronal cell body [G…	endopeptidase activity [GO:0004175];integrin binding [GO:0005178];metal ion binding [GO:0046872];metalloendopeptidase activity [GO:0004222];metalloendopeptidase activity involved in amyloid precursor protein catabolic process [GO:1902945];metallopeptidase activity [GO:0008237];protein homodimerization activity [GO:0042803];protein kinase binding [GO:0019901];SH3 domain binding [GO:0017124];signal…	GO:0000139;GO:0001701;GO:0004175;GO:0004222;GO:0005102;GO:0005178;GO:0005634;GO:0005737;GO:0005788;GO:0005794;GO:0005798;GO:0005802;GO:0005886;GO:0005925;GO:0006468;GO:0006509;GO:0007162;GO:0007219;GO:0007229;GO:0007267;GO:0007283;GO:0008021;GO:0008237;GO:0008284;GO:0008593;GO:0009986;GO:0010820;GO:0014069;GO:0016020;GO:0016021;GO:0016485;GO:0017124;GO:0019901;GO:0022617;GO:0030307;GO:0030335;GO:…
PLCD1	P51178	1-phosphatidylinositol 4,5-bisphosphate phosphodiesterase delta-1	13	24.3	85.664	323.31	1.79099	0.832766	26.6422	26.51	26.5703	27.3848	27.2285	27.5831	25.952	26.7042	25.7368	25.9453	25.6605	25.8787	27.1984	angiogenesis [GO:0001525];inositol phosphate metabolic process [GO:0043647];inositol trisphosphate biosynthetic process [GO:0032959];intracellular signal transduction [GO:0035556];labyrinthine layer blood vessel development [GO:0060716];lipid catabolic process [GO:0016042];phospholipid metabolic process [GO:0006644];regulation of cell population proliferation [GO:0042127]	cytoplasm [GO:0005737];cytosol [GO:0005829];extracellular exosome [GO:0070062];plasma membrane [GO:0005886]	calcium ion binding [GO:0005509];GTPase activating protein binding [GO:0032794];phosphatidylinositol-4,5-bisphosphate binding [GO:0005546];phosphatidylinositol phospholipase C activity [GO:0004435]	GO:0001525;GO:0004435;GO:0005509;GO:0005546;GO:0005737;GO:0005829;GO:0005886;GO:0006644;GO:0016042;GO:0032794;GO:0032959;GO:0035556;GO:0042127;GO:0043647;GO:0060716;GO:0070062
PSAP	P07602	Prosaposin;Saposin-A;Saposin-B-Val;Saposin-B;Saposin-C;Saposin-D	5	14.1	58.112	7.0882	1.68322	0.829747	25.6376	25.6905	24.307	NaN	25.0338	24.457	NaN	24.169	24.1867	24.2594	24.1231	NaN	24.2389	adenylate cyclase-inhibiting G protein-coupled receptor signaling pathway [GO:0007193];cellular response to organic substance [GO:0071310];cochlea development [GO:0090102];corneocyte development [GO:0003335];cornified envelope assembly [GO:1903575];epithelial cell differentiation involved in prostate gland development [GO:0060742];galactosylceramide catabolic process [GO:0006683];ganglioside GM1 …	azurophil granule membrane [GO:0035577];collagen-containing extracellular matrix [GO:0062023];extracellular exosome [GO:0070062];extracellular region [GO:0005576];extracellular space [GO:0005615];intracellular membrane-bounded organelle [GO:0043231];late endosome [GO:0005770];lysosomal lumen [GO:0043202];lysosomal membrane [GO:0005765];lysosome [GO:0005764];plasma membrane [GO:0005886]	beta-galactosidase activity [GO:0004565];enzyme activator activity [GO:0008047];ganglioside GM1 binding [GO:1905573];ganglioside GM2 binding [GO:1905574];ganglioside GM3 binding [GO:1905575];ganglioside GP1c binding [GO:1905577];ganglioside GT1b binding [GO:1905576];G protein-coupled receptor binding [GO:0001664];identical protein binding [GO:0042802];lipid binding [GO:0008289];phospholipid bindi…	GO:0001664;GO:0002020;GO:0002576;GO:0003335;GO:0004565;GO:0005543;GO:0005576;GO:0005615;GO:0005764;GO:0005765;GO:0005770;GO:0005886;GO:0006683;GO:0006687;GO:0006869;GO:0007041;GO:0007186;GO:0007193;GO:0007605;GO:0008047;GO:0008289;GO:0010506;GO:0019216;GO:0035577;GO:0042552;GO:0042802;GO:0042803;GO:0043202;GO:0043231;GO:0043312;GO:0043410;GO:0050885;GO:0051345;GO:0060073;GO:0060736;GO:0060742;GO:…
TBC1D10A	Q9BXI6	TBC1 domain family member 10A	6	19.7	57.117	23.368	2.65854	0.82585	23.9301	23.044	23.1229	23.2087	22.9023	23.4697	22.3708	22.219	NaN	22.3252	22.8629	22.4911	NaN	activation of cysteine-type endopeptidase activity [GO:0097202];activation of GTPase activity [GO:0090630];intracellular protein transport [GO:0006886];positive regulation of proteolysis [GO:0045862];retrograde transport, endosome to Golgi [GO:0042147]	cytosol [GO:0005829];extracellular exosome [GO:0070062];microvillus [GO:0005902];plasma membrane [GO:0005886]	cadherin binding [GO:0045296];GTPase activator activity [GO:0005096];guanyl-nucleotide exchange factor activity [GO:0005085];PDZ domain binding [GO:0030165];Rab GTPase binding [GO:0017137]	GO:0005085;GO:0005096;GO:0005829;GO:0005886;GO:0005902;GO:0006886;GO:0017137;GO:0030165;GO:0042147;GO:0045296;GO:0045862;GO:0070062;GO:0090630;GO:0097202
CRYAB	P02511	Alpha-crystallin B chain	7	42.9	20.159	115.84	1.70706	0.825618	26.4219	26.3233	26.6517	26.7636	26.6549	26.6706	25.5222	26.1559	25.4247	24.8436	25.4064	25.8273	27.1074	apoptotic process involved in morphogenesis [GO:0060561];cellular response to gamma radiation [GO:0071480];lens development in camera-type eye [GO:0002088];microtubule polymerization or depolymerization [GO:0031109];multicellular organism aging [GO:0010259];muscle contraction [GO:0006936];muscle organ development [GO:0007517];negative regulation of amyloid fibril formation [GO:1905907];negative r…	actin filament bundle [GO:0032432];axon [GO:0030424];cardiac myofibril [GO:0097512];cell surface [GO:0009986];cytoplasm [GO:0005737];cytosol [GO:0005829];dendritic spine [GO:0043197];extracellular exosome [GO:0070062];Golgi apparatus [GO:0005794];M band [GO:0031430];microtubule cytoskeleton [GO:0015630];mitochondrion [GO:0005739];nucleoplasm [GO:0005654];nucleus [GO:0005634];perikaryon [GO:004320…	amyloid-beta binding [GO:0001540];identical protein binding [GO:0042802];metal ion binding [GO:0046872];microtubule binding [GO:0008017];protein-containing complex binding [GO:0044877];protein homodimerization activity [GO:0042803];structural constituent of eye lens [GO:0005212];unfolded protein binding [GO:0051082]	GO:0001540;GO:0001666;GO:0002088;GO:0005212;GO:0005634;GO:0005654;GO:0005737;GO:0005739;GO:0005794;GO:0005829;GO:0006457;GO:0006936;GO:0007021;GO:0007517;GO:0008017;GO:0009986;GO:0010259;GO:0010941;GO:0014069;GO:0015630;GO:0030018;GO:0030308;GO:0030424;GO:0031109;GO:0031430;GO:0032355;GO:0032387;GO:0032432;GO:0032463;GO:0032991;GO:0042542;GO:0042802;GO:0042803;GO:0043066;GO:0043154;GO:0043197;GO:…
AFAP1	Q8N556	Actin filament-associated protein 1	5	8.2	80.724	23.64	2.39881	0.825042	23.918	24.1831	24.143	23.7565	23.4242	NaN	23.1265	22.4923	22.6997	23.2003	NaN	23.3369	23.5041	regulation of cytoskeleton organization [GO:0051493];regulation of signal transduction [GO:0009966]	actin cytoskeleton [GO:0015629];cytosol [GO:0005829];focal adhesion [GO:0005925]	actin binding [GO:0003779];SH2 domain binding [GO:0042169];SH3 domain binding [GO:0017124]	GO:0003779;GO:0005829;GO:0005925;GO:0009966;GO:0015629;GO:0017124;GO:0042169;GO:0051493
SUCLA2	Q9P2R7	Succinyl-CoA ligase [ADP-forming] subunit beta, mitochondrial	13	24.8	50.317	40.684	2.56359	0.823979	25.5928	25.8408	25.9497	26.6309	26.7767	26.2309	25.5951	25.0343	25.597	25.1858	25.211	25.7796	25.0215	succinate metabolic process [GO:0006105];succinyl-CoA metabolic process [GO:0006104];succinyl-CoA pathway [GO:0006781];tricarboxylic acid cycle [GO:0006099]	extracellular exosome [GO:0070062];mitochondrial matrix [GO:0005759];mitochondrion [GO:0005739];succinate-CoA ligase complex [GO:0042709]	ATP binding [GO:0005524];magnesium ion binding [GO:0000287];succinate-CoA ligase (ADP-forming) activity [GO:0004775]	GO:0000287;GO:0004775;GO:0005524;GO:0005739;GO:0005759;GO:0006099;GO:0006104;GO:0006105;GO:0006781;GO:0042709;GO:0070062
ATP2B1	P20020	Plasma membrane calcium-transporting ATPase 1	22	24.1	134.68	79.988	4.82696	0.817559	26.1625	26.1363	26.0746	25.9787	26.0396	25.8397	24.8919	25.5656	25.1572	25.3889	25.413	24.9461	25.1844	aging [GO:0007568];brain development [GO:0007420];calcium ion export across plasma membrane [GO:1990034];cellular calcium ion homeostasis [GO:0006874];cellular response to corticosterone stimulus [GO:0071386];cellular response to vitamin D [GO:0071305];ion transmembrane transport [GO:0034220];negative regulation of cytokine production [GO:0001818];negative regulation of cytosolic calcium ion conc…	apical plasma membrane [GO:0016324];basolateral plasma membrane [GO:0016323];cell junction [GO:0030054];cytoplasmic side of plasma membrane [GO:0009898];dendritic spine membrane [GO:0032591];extracellular exosome [GO:0070062];GABA-ergic synapse [GO:0098982];glutamatergic synapse [GO:0098978];immunological synapse [GO:0001772];integral component of plasma membrane [GO:0005887];integral component o…	ATPase activity [GO:0016887];ATP binding [GO:0005524];calcium ion transmembrane transporter activity [GO:0015085];calcium transmembrane transporter activity, phosphorylative mechanism [GO:0005388];calcium-transporting ATPase activity involved in regulation of presynaptic cytosolic calcium ion concentration [GO:1905056];calmodulin binding [GO:0005516];metal ion binding [GO:0046872];PDZ domain bind…	GO:0001772;GO:0001818;GO:0003056;GO:0003407;GO:0005388;GO:0005516;GO:0005524;GO:0005634;GO:0005886;GO:0005887;GO:0006874;GO:0007420;GO:0007568;GO:0008217;GO:0009409;GO:0009898;GO:0015085;GO:0016020;GO:0016323;GO:0016324;GO:0016887;GO:0030054;GO:0030165;GO:0030501;GO:0032591;GO:0032809;GO:0034220;GO:0045121;GO:0046872;GO:0051480;GO:0051481;GO:0051928;GO:0070062;GO:0071305;GO:0071386;GO:0098978;GO:…
TXNRD1	Q16881	Thioredoxin reductase 1, cytoplasmic	18	32.8	70.905	323.31	3.0993	0.816081	28.6695	28.6277	28.7732	28.2642	28.2548	27.9878	27.6794	27.4946	27.646	27.267	27.471	27.4363	28.2999	cell population proliferation [GO:0008283];cell redox homeostasis [GO:0045454];cellular response to oxidative stress [GO:0034599];mesoderm formation [GO:0001707];nucleobase-containing small molecule interconversion [GO:0015949];regulation of lipid metabolic process [GO:0019216];selenium compound metabolic process [GO:0001887];signal transduction [GO:0007165]	cytoplasm [GO:0005737];cytosol [GO:0005829];extracellular exosome [GO:0070062];fibrillar center [GO:0001650];mitochondrion [GO:0005739];nucleoplasm [GO:0005654]	electron transfer activity [GO:0009055];flavin adenine dinucleotide binding [GO:0050660];protein disulfide oxidoreductase activity [GO:0015035];thioredoxin-disulfide reductase activity [GO:0004791]	GO:0001650;GO:0001707;GO:0001887;GO:0004791;GO:0005654;GO:0005737;GO:0005739;GO:0005829;GO:0007165;GO:0008283;GO:0009055;GO:0015035;GO:0015949;GO:0019216;GO:0034599;GO:0045454;GO:0050660;GO:0070062
LGALS3	P17931	Galectin-3	6	22.4	26.152	86.328	3.63985	0.814376	30.3052	30.4529	30.2637	30.2836	30.5023	30.7815	29.4619	29.6322	29.6652	29.4602	29.5952	30.2709	29.2346	antimicrobial humoral immune response mediated by antimicrobial peptide [GO:0061844];eosinophil chemotaxis [GO:0048245];epithelial cell differentiation [GO:0030855];innate immune response [GO:0045087];killing of cells of other organism [GO:0031640];macrophage chemotaxis [GO:0048246];monocyte chemotaxis [GO:0002548];mononuclear cell migration [GO:0071674];mRNA processing [GO:0006397];negative regu…	cell surface [GO:0009986];collagen-containing extracellular matrix [GO:0062023];cytoplasm [GO:0005737];extracellular exosome [GO:0070062];extracellular region [GO:0005576];extracellular space [GO:0005615];ficolin-1-rich granule membrane [GO:0101003];immunological synapse [GO:0001772];membrane [GO:0016020];mitochondrial inner membrane [GO:0005743];nucleus [GO:0005634];other organism cell [GO:00442…	carbohydrate binding [GO:0030246];chemoattractant activity [GO:0042056];IgE binding [GO:0019863];laminin binding [GO:0043236];oligosaccharide binding [GO:0070492];protein phosphatase binding [GO:0019903];protein phosphatase inhibitor activity [GO:0004864];RNA binding [GO:0003723]	GO:0001772;GO:0002548;GO:0003723;GO:0004864;GO:0005576;GO:0005615;GO:0005634;GO:0005681;GO:0005737;GO:0005743;GO:0005886;GO:0006397;GO:0008380;GO:0009986;GO:0016020;GO:0019863;GO:0019903;GO:0030246;GO:0030593;GO:0030667;GO:0030855;GO:0031640;GO:0042056;GO:0042129;GO:0043236;GO:0043312;GO:0044216;GO:0045087;GO:0045637;GO:0045806;GO:0048245;GO:0048246;GO:0050860;GO:0050918;GO:0061844;GO:0062023;GO:…
ARMCX2	Q7L311	Armadillo repeat-containing X-linked protein 2	7	27.1	65.683	181.09	2.61794	0.811568	25.2402	25.0128	25.3359	25.8369	24.9933	24.5292	24.6263	24.0142	24.7784	24.2666	24.5561	24.2113	23.9726		integral component of membrane [GO:0016021];mitochondrial outer membrane [GO:0005741]		GO:0005741;GO:0016021
SERPINE2	P07093	Glia-derived nexin	10	23.1	44.002	218.85	2.55982	0.809394	28.4795	28.5509	28.6872	28.4014	28.2341	28.2524	28.213	27.4305	27.5541	28.0708	27.3269	27.9547	26.824	blood coagulation [GO:0007596];cerebellar granular layer morphogenesis [GO:0021683];detection of mechanical stimulus involved in sensory perception [GO:0050974];innervation [GO:0060384];long-term synaptic potentiation [GO:0060291];mating plug formation [GO:0042628];negative regulation of blood coagulation [GO:0030195];negative regulation of cell growth [GO:0030308];negative regulation of cell pop…	collagen-containing extracellular matrix [GO:0062023];cytosol [GO:0005829];extracellular region [GO:0005576];extracellular space [GO:0005615];extracellular vesicle [GO:1903561];extrinsic component of external side of plasma membrane [GO:0031232];neuromuscular junction [GO:0031594];platelet alpha granule [GO:0031091]	glycosaminoglycan binding [GO:0005539];heparin binding [GO:0008201];serine-type endopeptidase inhibitor activity [GO:0004867];signaling receptor binding [GO:0005102]	GO:0004867;GO:0005102;GO:0005539;GO:0005576;GO:0005615;GO:0005829;GO:0007596;GO:0008201;GO:0008285;GO:0010757;GO:0010766;GO:0010951;GO:0010955;GO:0014067;GO:0021683;GO:0030195;GO:0030308;GO:0030334;GO:0031091;GO:0031232;GO:0031594;GO:0032940;GO:0033363;GO:0042177;GO:0042628;GO:0045861;GO:0045879;GO:0048505;GO:0048711;GO:0050974;GO:0051966;GO:0060291;GO:0060384;GO:0061108;GO:0062023;GO:0090331;GO:…
SNX21	Q969T3	Sorting nexin-21	7	32.2	41.365	38.66	2.08282	0.808912	23.202	23.2424	23.7284	24.3945	23.8725	24.1454	NaN	22.3512	23.0739	22.9335	23.3735	23.2451	22.7545	protein transport [GO:0015031]	cytoplasmic vesicle membrane [GO:0030659];early endosome membrane [GO:0031901]	phosphatidylinositol-3-phosphate binding [GO:0032266];phosphatidylinositol-4,5-bisphosphate binding [GO:0005546]	GO:0005546;GO:0015031;GO:0030659;GO:0031901;GO:0032266
STIM1	Q13586	Stromal interaction molecule 1	13	24.1	77.422	104.72	4.34724	0.807466	25.8357	25.8182	26.111	26.3091	25.9187	25.7686	24.9314	25.2914	25.1975	24.8382	25.0048	25.4911	25.3147	activation of store-operated calcium channel activity [GO:0032237];cellular calcium ion homeostasis [GO:0006874];detection of calcium ion [GO:0005513];enamel mineralization [GO:0070166];positive regulation of adenylate cyclase activity [GO:0045762];positive regulation of angiogenesis [GO:0045766];regulation of calcium ion transport [GO:0051924];regulation of cardiac conduction [GO:1903779];regula…	cortical endoplasmic reticulum [GO:0032541];endoplasmic reticulum [GO:0005783];endoplasmic reticulum membrane [GO:0005789];integral component of endoplasmic reticulum membrane [GO:0030176];integral component of plasma membrane [GO:0005887];microtubule [GO:0005874];plasma membrane [GO:0005886];plasma membrane raft [GO:0044853];sarcoplasmic reticulum membrane [GO:0033017]	calcium channel regulator activity [GO:0005246];calcium ion binding [GO:0005509];identical protein binding [GO:0042802];microtubule plus-end binding [GO:0051010];protease binding [GO:0002020]	GO:0002020;GO:0002115;GO:0005246;GO:0005509;GO:0005513;GO:0005783;GO:0005789;GO:0005874;GO:0005886;GO:0005887;GO:0006874;GO:0030176;GO:0032237;GO:0032541;GO:0033017;GO:0042802;GO:0044853;GO:0045762;GO:0045766;GO:0051010;GO:0051924;GO:0070166;GO:1903779;GO:2001256
ECSIT	Q9BQ95	Evolutionarily conserved signaling intermediate in Toll pathway, mitochondrial	2	10.2	49.148	8.7225	1.82886	0.807015	NaN	NaN	23.0392	23.2825	22.3953	22.5525	NaN	22.0099	21.6806	22.241	22.4285	21.4005	22.3016	innate immune response [GO:0045087];mitochondrial respiratory chain complex I assembly [GO:0032981];regulation of oxidoreductase activity [GO:0051341]	cytoplasm [GO:0005737];cytosol [GO:0005829];mitochondrial inner membrane [GO:0005743];mitochondrion [GO:0005739];nucleoplasm [GO:0005654];nucleus [GO:0005634]	oxidoreductase activity, acting on NAD(P)H [GO:0016651]	GO:0005634;GO:0005654;GO:0005737;GO:0005739;GO:0005743;GO:0005829;GO:0016651;GO:0032981;GO:0045087;GO:0051341
SSH3	Q8TE77	Protein phosphatase Slingshot homolog 3	11	26.1	72.995	200.57	2.06646	0.801868	24.3275	24.1614	24.4853	24.6107	24.3851	24.1942	23.3185	24.3147	23.2667	22.987	23.1566	23.3813	24.4869	cell morphogenesis [GO:0000902]	cytoplasm [GO:0005737];cytoskeleton [GO:0005856];nucleus [GO:0005634]	actin binding [GO:0003779];phosphoprotein phosphatase activity [GO:0004721];protein tyrosine/serine/threonine phosphatase activity [GO:0008138];protein tyrosine phosphatase activity [GO:0004725]	GO:0000902;GO:0003779;GO:0004721;GO:0004725;GO:0005634;GO:0005737;GO:0005856;GO:0008138
TSC22D1	Q15714	TSC22 domain family protein 1	8	12.5	109.68	47.988	1.86872	0.791941	24.7218	24.8076	24.7825	25.3247	25.1932	25.0769	23.9112	23.0904	24.4359	24.3397	24.7453	24.9118	23.9131	transcription by RNA polymerase II [GO:0006366]	cytoplasm [GO:0005737];nucleus [GO:0005634]	DNA-binding transcription factor activity, RNA polymerase II-specific [GO:0000981]	GO:0000981;GO:0005634;GO:0005737;GO:0006366
EHBP1L1	Q8N3D4	EH domain-binding protein 1-like protein 1	30	29.2	161.85	323.31	3.08851	0.791507	25.3061	25.3951	25.299	25.9534	25.8721	25.8551	24.8995	24.5622	24.7359	24.8613	24.3736	24.9659	25.3552		endosome [GO:0005768];membrane [GO:0016020]		GO:0005768;GO:0016020
APLP2	Q06481	Amyloid-like protein 2	5	12.2	86.955	23.535	2.45287	0.789412	25.0985	25.0334	25.0098	24.2793	24.3896	23.9789	24.3517	23.9472	23.8576	23.8701	23.5329	23.8437	23.492	cellular protein metabolic process [GO:0044267];G protein-coupled receptor signaling pathway [GO:0007186];platelet degranulation [GO:0002576];post-translational protein modification [GO:0043687]	endoplasmic reticulum lumen [GO:0005788];extracellular exosome [GO:0070062];integral component of membrane [GO:0016021];membrane [GO:0016020];nucleus [GO:0005634];plasma membrane [GO:0005886];platelet alpha granule membrane [GO:0031092]	DNA binding [GO:0003677];heparin binding [GO:0008201];identical protein binding [GO:0042802];serine-type endopeptidase inhibitor activity [GO:0004867];transition metal ion binding [GO:0046914]	GO:0002576;GO:0003677;GO:0004867;GO:0005634;GO:0005788;GO:0005886;GO:0007186;GO:0008201;GO:0016020;GO:0016021;GO:0031092;GO:0042802;GO:0043687;GO:0044267;GO:0046914;GO:0070062
TLN2	Q9Y4G6	Talin-2	44	24	271.61	323.31	2.38281	0.788656	26.7236	26.7853	26.8816	26.5545	26.4489	26.2681	25.8797	24.9868	26.0957	26.2195	26.0447	26.2359	25.2893	cell adhesion [GO:0007155];cell-cell junction assembly [GO:0007043];cytoskeletal anchoring at plasma membrane [GO:0007016]	actin cytoskeleton [GO:0015629];cytoplasm [GO:0005737];focal adhesion [GO:0005925];plasma membrane [GO:0005886];ruffle [GO:0001726];synapse [GO:0045202]	actin binding [GO:0003779];actin filament binding [GO:0051015];structural constituent of cytoskeleton [GO:0005200];structural molecule activity [GO:0005198]	GO:0001726;GO:0003779;GO:0005198;GO:0005200;GO:0005737;GO:0005886;GO:0005925;GO:0007016;GO:0007043;GO:0007155;GO:0015629;GO:0045202;GO:0051015
PPCS	Q9HAB8	Phosphopantothenate--cysteine ligase	6	20.6	34.005	7.1664	1.899	0.78744	24.675	NaN	24.8658	24.6416	24.2631	24.0314	NaN	23.9085	24.1202	23.4723	22.9352	23.6079	24.2035	acetyl-CoA biosynthetic process [GO:0006085];coenzyme A biosynthetic process [GO:0015937];coenzyme biosynthetic process [GO:0009108];heart process [GO:0003015]	cytosol [GO:0005829]	phosphopantothenate--cysteine ligase activity [GO:0004632];protein homodimerization activity [GO:0042803]	GO:0003015;GO:0004632;GO:0005829;GO:0006085;GO:0009108;GO:0015937;GO:0042803
GFM1	Q96RP9	Elongation factor G, mitochondrial	12	16.1	83.471	17.547	2.07229	0.787352	24.6015	25.1242	24.6702	25.3773	25.5763	25.9553	24.9361	24.4402	24.446	24.5412	24.3853	24.5288	23.7331	mitochondrial translational elongation [GO:0070125]	mitochondrial matrix [GO:0005759];mitochondrion [GO:0005739]	GTPase activity [GO:0003924];GTP binding [GO:0005525];RNA binding [GO:0003723];translation elongation factor activity [GO:0003746]	GO:0003723;GO:0003746;GO:0003924;GO:0005525;GO:0005739;GO:0005759;GO:0070125
PC	P11498	Pyruvate carboxylase, mitochondrial	17	20.3	129.63	232.29	2.5866	0.786048	24.5644	24.5676	24.6617	25.0508	25.0451	24.8414	24.0471	23.5799	24.2444	24.3361	24.1301	24.4688	23.2109	biotin metabolic process [GO:0006768];gluconeogenesis [GO:0006094];lipid metabolic process [GO:0006629];negative regulation of gene expression [GO:0010629];positive regulation by host of viral process [GO:0044794];positive regulation by host of viral release from host cell [GO:0044791];pyruvate metabolic process [GO:0006090];viral RNA genome packaging [GO:0019074]	cytoplasm [GO:0005737];cytosol [GO:0005829];mitochondrial matrix [GO:0005759];mitochondrion [GO:0005739]	ATP binding [GO:0005524];biotin binding [GO:0009374];identical protein binding [GO:0042802];metal ion binding [GO:0046872];pyruvate carboxylase activity [GO:0004736]	GO:0004736;GO:0005524;GO:0005737;GO:0005739;GO:0005759;GO:0005829;GO:0006090;GO:0006094;GO:0006629;GO:0006768;GO:0009374;GO:0010629;GO:0019074;GO:0042802;GO:0044791;GO:0044794;GO:0046872
MFF	Q9GZY8	Mitochondrial fission factor	5	24.6	38.464	16.377	2.67853	0.782209	25.2157	24.881	24.811	25.2616	25.2528	25.1607	NaN	24.1605	25.0053	24.1433	24.0074	24.2581	NaN	mitochondrial fission [GO:0000266];mitochondrial fragmentation involved in apoptotic process [GO:0043653];mitochondrial fusion [GO:0008053];mitochondrion morphogenesis [GO:0070584];peroxisome fission [GO:0016559];positive regulation of mitochondrial fission [GO:0090141];positive regulation of protein targeting to membrane [GO:0090314];positive regulation of release of cytochrome c from mitochondr…	cell junction [GO:0030054];integral component of mitochondrial membrane [GO:0032592];mitochondrial outer membrane [GO:0005741];mitochondrion [GO:0005739];peroxisome [GO:0005777];synaptic vesicle [GO:0008021]	protein homodimerization activity [GO:0042803]	GO:0000266;GO:0001836;GO:0005739;GO:0005741;GO:0005777;GO:0006626;GO:0008021;GO:0008053;GO:0010821;GO:0016559;GO:0030054;GO:0032592;GO:0042803;GO:0043653;GO:0051260;GO:0070584;GO:0090141;GO:0090200;GO:0090314;GO:1900063
ARMCX3	Q9UH62	Armadillo repeat-containing X-linked protein 3	7	25.3	42.5	42.987	2.6872	0.782115	25.9497	26.1701	26.1357	26.8952	26.6089	26.8948	25.5339	25.1562	26.0188	25.727	25.6836	25.9565	25.546	cellular protein localization [GO:0034613];positive regulation of transcription by RNA polymerase II [GO:0045944]	integral component of mitochondrial outer membrane [GO:0031307];nucleus [GO:0005634]		GO:0005634;GO:0031307;GO:0034613;GO:0045944
TTC28	Q96AY4	Tetratricopeptide repeat protein 28	19	10.4	270.88	154.57	3.98164	0.78006	24.1357	24.3128	24.2054	24.3107	24.2932	24.309	23.116	23.1867	23.7469	23.6153	23.2956	23.9807	23.4264	cell cycle [GO:0007049];cell division [GO:0051301];regulation of mitotic cell cycle [GO:0007346]	cytoplasm [GO:0005737];microtubule organizing center [GO:0005815];midbody [GO:0030496];mitotic spindle [GO:0072686];spindle pole [GO:0000922]	kinase binding [GO:0019900]	GO:0000922;GO:0005737;GO:0005815;GO:0007049;GO:0007346;GO:0019900;GO:0030496;GO:0051301;GO:0072686
CEP170	Q5SW79	Centrosomal protein of 170 kDa	29	26.7	175.29	323.31	2.58322	0.778633	26.3618	26.4475	26.6288	26.7451	26.4391	26.1432	26.3558	24.8992	25.7442	25.6502	25.8723	25.8559	25.3983		centriolar subdistal appendage [GO:0120103];centriole [GO:0005814];centrosome [GO:0005813];cytosol [GO:0005829];microtubule [GO:0005874];plasma membrane [GO:0005886];spindle [GO:0005819]		GO:0005813;GO:0005814;GO:0005819;GO:0005829;GO:0005874;GO:0005886;GO:0120103
RRAS	P10301	Ras-related protein R-Ras	11	51.8	23.48	182.68	2.74895	0.774792	26.6264	26.6999	26.9862	26.9618	26.9193	26.3296	25.9825	26.3282	26.2199	25.5409	25.5588	25.6836	26.5397	face morphogenesis [GO:0060325];leukocyte differentiation [GO:0002521];negative regulation of cell migration [GO:0030336];positive regulation of angiogenesis [GO:0045766];Ras protein signal transduction [GO:0007265];regulation of ERK1 and ERK2 cascade [GO:0070372];regulation of protein kinase B signaling [GO:0051896]	extracellular exosome [GO:0070062];focal adhesion [GO:0005925];plasma membrane [GO:0005886]	GDP binding [GO:0019003];GTPase activity [GO:0003924];GTP binding [GO:0005525];protein-containing complex binding [GO:0044877]	GO:0002521;GO:0003924;GO:0005525;GO:0005886;GO:0005925;GO:0007265;GO:0019003;GO:0030336;GO:0044877;GO:0045766;GO:0051896;GO:0060325;GO:0070062;GO:0070372
SPTBN1	Q01082	Spectrin beta chain, non-erythrocytic 1	68	32.5	274.61	323.31	1.42047	0.771333	27.6188	27.6993	27.6337	28.8777	29.0683	28.9335	26.7724	27.2195	27.6709	27.6536	27.4597	28.1971	27.7638	actin filament capping [GO:0051693];axon guidance [GO:0007411];common-partner SMAD protein phosphorylation [GO:0007182];endoplasmic reticulum to Golgi vesicle-mediated transport [GO:0006888];Golgi to plasma membrane protein transport [GO:0043001];MAPK cascade [GO:0000165];membrane assembly [GO:0071709];mitotic cytokinesis [GO:0000281];plasma membrane organization [GO:0007009];positive regulation …	axolemma [GO:0030673];cuticular plate [GO:0032437];cytoplasm [GO:0005737];cytosol [GO:0005829];extracellular exosome [GO:0070062];glutamatergic synapse [GO:0098978];M band [GO:0031430];nucleolus [GO:0005730];postsynaptic density [GO:0014069];protein-containing complex [GO:0032991];spectrin [GO:0008091];spectrin-associated cytoskeleton [GO:0014731]	actin binding [GO:0003779];ankyrin binding [GO:0030506];cadherin binding [GO:0045296];calmodulin binding [GO:0005516];GTPase binding [GO:0051020];phospholipid binding [GO:0005543];protein-containing complex binding [GO:0044877];RNA binding [GO:0003723];structural constituent of cytoskeleton [GO:0005200]	GO:0000165;GO:0000281;GO:0003723;GO:0003779;GO:0005200;GO:0005516;GO:0005543;GO:0005730;GO:0005737;GO:0005829;GO:0006888;GO:0007009;GO:0007182;GO:0007411;GO:0008091;GO:0014069;GO:0014731;GO:0030506;GO:0030673;GO:0031430;GO:0032437;GO:0032991;GO:0043001;GO:0044877;GO:0045296;GO:0051020;GO:0051693;GO:0060390;GO:0070062;GO:0071709;GO:0072659;GO:0098978;GO:1900042;GO:1903076;GO:1903078
EPN2	O95208	Epsin-2	6	15.9	68.481	56.924	4.14139	0.763572	23.3568	23.1835	23.3395	22.9709	22.9223	23.296	22.59	NaN	22.6285	22.18	22.5807	22.3719	22.1363	endocytosis [GO:0006897];membrane organization [GO:0061024];negative regulation of sprouting angiogenesis [GO:1903671];negative regulation of vascular endothelial growth factor receptor signaling pathway [GO:0030948];positive regulation of Notch signaling pathway [GO:0045747]	clathrin coat of endocytic vesicle [GO:0030128];cytosol [GO:0005829];intracellular membrane-bounded organelle [GO:0043231]	cadherin binding [GO:0045296];lipid binding [GO:0008289]	GO:0005829;GO:0006897;GO:0008289;GO:0030128;GO:0030948;GO:0043231;GO:0045296;GO:0045747;GO:0061024;GO:1903671
LAMP1	P11279	Lysosome-associated membrane glycoprotein 1	6	15.8	44.882	11.881	1.71431	0.762664	29.9952	30.2007	30.2628	29.4951	30.0565	30.6011	29.8682	29.3079	28.5571	28.5177	29.5002	29.6514	29.972	autophagic cell death [GO:0048102];establishment of protein localization to organelle [GO:0072594];Golgi to lysosome transport [GO:0090160];granzyme-mediated apoptotic signaling pathway [GO:0008626];neutrophil degranulation [GO:0043312];positive regulation of natural killer cell degranulation [GO:0043323];positive regulation of natural killer cell mediated cytotoxicity [GO:0045954];protein stabil…	alveolar lamellar body [GO:0097208];autolysosome [GO:0044754];azurophil granule membrane [GO:0035577];cytolytic granule [GO:0044194];cytoplasm [GO:0005737];cytosol [GO:0005829];dendrite [GO:0030425];endosome membrane [GO:0010008];external side of plasma membrane [GO:0009897];extracellular exosome [GO:0070062];ficolin-1-rich granule membrane [GO:0101003];integral component of plasma membrane [GO:0…	enzyme binding [GO:0019899];protein domain specific binding [GO:0019904];virus receptor activity [GO:0001618]	GO:0001618;GO:0005737;GO:0005764;GO:0005765;GO:0005770;GO:0005771;GO:0005829;GO:0005886;GO:0005887;GO:0008626;GO:0009897;GO:0010008;GO:0016020;GO:0019899;GO:0019904;GO:0030285;GO:0030425;GO:0031902;GO:0035577;GO:0042383;GO:0042470;GO:0043025;GO:0043312;GO:0043323;GO:0044194;GO:0044754;GO:0045954;GO:0048102;GO:0048471;GO:0050821;GO:0061474;GO:0070062;GO:0072594;GO:0090160;GO:0097208;GO:0101003;GO:…
HSPA1B;HSPA1A	P0DMV9;P0DMV8	Heat shock 70 kDa protein 1B;Heat shock 70 kDa protein 1A	26	49	70.051	323.31	3.98208	0.762571	30.1666	30.2264	30.2634	29.8606	29.8821	30.3603	29.5345	29.7231	29.3325	29.3433	28.8976	29.3953	29.3218	ATP metabolic process [GO:0046034];cellular heat acclimation [GO:0070370];cellular response to heat [GO:0034605];cellular response to oxidative stress [GO:0034599];cellular response to unfolded protein [GO:0034620];chaperone cofactor-dependent protein refolding [GO:0051085];mRNA catabolic process [GO:0006402];negative regulation of apoptotic process [GO:0043066];negative regulation of cell death …	aggresome [GO:0016235];blood microparticle [GO:0072562];centriole [GO:0005814];centrosome [GO:0005813];cytoplasm [GO:0005737];cytosol [GO:0005829];endoplasmic reticulum [GO:0005783];extracellular exosome [GO:0070062];extracellular region [GO:0005576];ficolin-1-rich granule lumen [GO:1904813];focal adhesion [GO:0005925];inclusion body [GO:0016234];mitochondrion [GO:0005739];nuclear speck [GO:00166…	ATPase activity [GO:0016887];ATPase activity, coupled [GO:0042623];ATP binding [GO:0005524];C3HC4-type RING finger domain binding [GO:0055131];enzyme binding [GO:0019899];G protein-coupled receptor binding [GO:0001664];heat shock protein binding [GO:0031072];histone deacetylase binding [GO:0042826];misfolded protein binding [GO:0051787];protein folding chaperone [GO:0044183];protein N-terminus bi…	GO:0001618;GO:0001664;GO:0003723;GO:0005102;GO:0005524;GO:0005576;GO:0005634;GO:0005654;GO:0005737;GO:0005739;GO:0005783;GO:0005813;GO:0005814;GO:0005829;GO:0005925;GO:0006402;GO:0006986;GO:0008285;GO:0010628;GO:0016234;GO:0016235;GO:0016607;GO:0016887;GO:0019899;GO:0030308;GO:0031072;GO:0031396;GO:0031397;GO:0031625;GO:0031982;GO:0032436;GO:0032757;GO:0032991;GO:0034599;GO:0034605;GO:0034620;GO:…
PRDX2	P32119	Peroxiredoxin-2	10	47.5	21.892	80.244	3.04743	0.762117	29.162	28.9609	29.0348	28.5533	28.8833	28.6144	27.9748	28.7972	27.9311	28.1379	27.8369	27.7856	28.2783	activation of MAPK activity [GO:0000187];cell redox homeostasis [GO:0045454];cellular response to oxidative stress [GO:0034599];homeostasis of number of cells [GO:0048872];hydrogen peroxide catabolic process [GO:0042744];leukocyte activation [GO:0045321];negative regulation of apoptotic process [GO:0043066];negative regulation of extrinsic apoptotic signaling pathway in absence of ligand [GO:2001…	cytoplasm [GO:0005737];cytosol [GO:0005829];extracellular exosome [GO:0070062]	antioxidant activity [GO:0016209];thioredoxin peroxidase activity [GO:0008379]	GO:0000187;GO:0002536;GO:0005737;GO:0005829;GO:0006979;GO:0008379;GO:0010310;GO:0016209;GO:0019430;GO:0030194;GO:0031665;GO:0032088;GO:0032496;GO:0034599;GO:0042098;GO:0042744;GO:0042981;GO:0043066;GO:0045321;GO:0045454;GO:0045581;GO:0048538;GO:0048872;GO:0070062;GO:2001240
MAP2K1	Q02750	Dual specificity mitogen-activated protein kinase kinase 1	12	31.3	43.439	323.31	2.52072	0.758171	26.97	27.2834	27.179	26.6306	26.4729	26.4325	25.9233	25.3664	26.1158	26.4704	26.3173	26.1627	26.1335	activation of MAPK activity [GO:0000187];activation of protein kinase activity [GO:0032147];Bergmann glial cell differentiation [GO:0060020];cell cycle arrest [GO:0007050];cell motility [GO:0048870];cellular senescence [GO:0090398];cerebellar cortex formation [GO:0021697];chemotaxis [GO:0006935];epithelial cell proliferation involved in lung morphogenesis [GO:0060502];ERK1 and ERK2 cascade [GO:00…	cytoplasm [GO:0005737];cytosol [GO:0005829];early endosome [GO:0005769];endoplasmic reticulum [GO:0005783];focal adhesion [GO:0005925];Golgi apparatus [GO:0005794];late endosome [GO:0005770];microtubule organizing center [GO:0005815];mitochondrion [GO:0005739];nucleus [GO:0005634];plasma membrane [GO:0005886]	ATP binding [GO:0005524];MAP kinase kinase activity [GO:0004708];protein C-terminus binding [GO:0008022];protein kinase activity [GO:0004672];protein N-terminus binding [GO:0047485];protein serine/threonine/tyrosine kinase activity [GO:0004712];protein serine/threonine kinase activator activity [GO:0043539];protein serine/threonine kinase activity [GO:0004674];protein tyrosine kinase activity [GO…	GO:0000165;GO:0000187;GO:0004672;GO:0004674;GO:0004708;GO:0004712;GO:0004713;GO:0005524;GO:0005634;GO:0005737;GO:0005739;GO:0005769;GO:0005770;GO:0005783;GO:0005794;GO:0005815;GO:0005829;GO:0005886;GO:0005925;GO:0006468;GO:0006935;GO:0007050;GO:0007165;GO:0007507;GO:0008022;GO:0008285;GO:0010628;GO:0010629;GO:0018107;GO:0021697;GO:0023014;GO:0030182;GO:0030216;GO:0030878;GO:0031098;GO:0032147;GO:…
H6PD	O95479	GDH/6PGL endoplasmic bifunctional protein;Glucose 1-dehydrogenase;6-phosphogluconolactonase	9	13.1	88.892	31.794	1.4611	0.756701	25.765	25.7315	25.8427	24.5944	24.3458	24.5399	24.0723	25.0315	24.3919	24.0035	24.0234	24.3224	24.8139	glucose metabolic process [GO:0006006];pentose-phosphate shunt [GO:0006098]	endoplasmic reticulum lumen [GO:0005788]	6-phosphogluconolactonase activity [GO:0017057];glucose 1-dehydrogenase [NAD(P)] activity [GO:0047936];glucose-6-phosphate dehydrogenase activity [GO:0004345];NADP binding [GO:0050661]	GO:0004345;GO:0005788;GO:0006006;GO:0006098;GO:0017057;GO:0047936;GO:0050661
ANXA5	P08758	Annexin A5	27	79.1	35.936	323.31	2.01285	0.754493	33.2107	33.0382	33.2392	33.8993	33.827	33.772	32.2438	32.7686	33.4224	32.085	32.6689	33.2076	32.8064	blood coagulation [GO:0007596];cellular response to gonadotropin-releasing hormone [GO:0097211];cellular response to lead ion [GO:0071284];negative regulation of apoptotic process [GO:0043066];negative regulation of blood coagulation [GO:0030195];negative regulation of prolactin secretion [GO:1902721];negative regulation of sequestering of calcium ion [GO:0051283];platelet degranulation [GO:00025…	collagen-containing extracellular matrix [GO:0062023];cytoplasm [GO:0005737];cytosol [GO:0005829];endothelial microparticle [GO:0072563];external side of plasma membrane [GO:0009897];extracellular exosome [GO:0070062];extracellular region [GO:0005576];focal adhesion [GO:0005925];intracellular [GO:0005622];membrane [GO:0016020]	calcium-dependent phospholipid binding [GO:0005544];calcium ion binding [GO:0005509];calcium transmembrane transporter activity, phosphorylative mechanism [GO:0005388];heparin binding [GO:0008201];peptide hormone binding [GO:0017046];phospholipase inhibitor activity [GO:0004859];phospholipid binding [GO:0005543];receptor tyrosine kinase binding [GO:0030971]	GO:0002576;GO:0004859;GO:0005388;GO:0005509;GO:0005543;GO:0005544;GO:0005576;GO:0005622;GO:0005737;GO:0005829;GO:0005925;GO:0007165;GO:0007596;GO:0008201;GO:0009897;GO:0010033;GO:0016020;GO:0017046;GO:0030195;GO:0030971;GO:0043065;GO:0043066;GO:0051283;GO:0051592;GO:0062023;GO:0070062;GO:0071284;GO:0072563;GO:0097066;GO:0097211;GO:1901317;GO:1902721
ATL1	Q8WXF7	Atlastin-1	10	19.5	63.543	226.39	1.74142	0.751697	25.3131	25.3732	25.5481	25.6358	25.4416	25.1763	23.7068	24.0098	24.7246	24.4692	25.0231	25.4233	25.284	axonogenesis [GO:0007409];endoplasmic reticulum organization [GO:0007029];endoplasmic reticulum tubular network membrane organization [GO:1990809];protein homooligomerization [GO:0051260]	axon [GO:0030424];endoplasmic reticulum [GO:0005783];endoplasmic reticulum membrane [GO:0005789];endoplasmic reticulum tubular network [GO:0071782];endoplasmic reticulum tubular network membrane [GO:0098826];Golgi apparatus [GO:0005794];Golgi cis cisterna [GO:0000137];Golgi membrane [GO:0000139];integral component of membrane [GO:0016021]	GTPase activity [GO:0003924];GTP binding [GO:0005525];identical protein binding [GO:0042802]	GO:0000137;GO:0000139;GO:0003924;GO:0005525;GO:0005783;GO:0005789;GO:0005794;GO:0007029;GO:0007409;GO:0016021;GO:0030424;GO:0042802;GO:0051260;GO:0071782;GO:0098826;GO:1990809
SDCBP	O00560	Syntenin-1	7	45.6	32.444	202.61	1.52845	0.74997	26.7907	26.974	27.1786	26.3336	26.8679	27.2903	26.6328	25.2136	26.559	26.4171	26.1509	26.8555	25.262	actin cytoskeleton organization [GO:0030036];chemical synaptic transmission [GO:0007268];ephrin receptor signaling pathway [GO:0048013];intracellular signal transduction [GO:0035556];negative regulation of proteasomal ubiquitin-dependent protein catabolic process [GO:0032435];negative regulation of receptor internalization [GO:0002091];neutrophil degranulation [GO:0043312];positive regulation of …	adherens junction [GO:0005912];azurophil granule lumen [GO:0035578];blood microparticle [GO:0072562];cytoplasm [GO:0005737];cytoskeleton [GO:0005856];cytosol [GO:0005829];endoplasmic reticulum membrane [GO:0005789];extracellular exosome [GO:0070062];extracellular region [GO:0005576];extracellular space [GO:0005615];extracellular vesicle [GO:1903561];focal adhesion [GO:0005925];interleukin-5 recep…	cytoskeletal adaptor activity [GO:0008093];frizzled binding [GO:0005109];identical protein binding [GO:0042802];interleukin-5 receptor binding [GO:0005137];phosphatidylinositol-4,5-bisphosphate binding [GO:0005546];protein heterodimerization activity [GO:0046982];protein N-terminus binding [GO:0047485];syndecan binding [GO:0045545]	GO:0002091;GO:0005109;GO:0005137;GO:0005546;GO:0005576;GO:0005615;GO:0005634;GO:0005654;GO:0005737;GO:0005789;GO:0005829;GO:0005856;GO:0005886;GO:0005895;GO:0005912;GO:0005925;GO:0006612;GO:0006930;GO:0007268;GO:0007346;GO:0008093;GO:0008284;GO:0010718;GO:0010862;GO:0016020;GO:0030036;GO:0030307;GO:0030335;GO:0030511;GO:0031965;GO:0032435;GO:0035556;GO:0035578;GO:0042327;GO:0042470;GO:0042802;GO:…
ZNF503;ZNF703	Q96F45;Q9H7S9	Zinc finger protein 503;Zinc finger protein 703	2	4.6	62.554	52.429	1.993	0.742868	23.9889	23.6374	23.7681	NaN	22.9363	NaN	23.123	22.596	22.9508	NaN	22.5697	23.1175	22.6819	G1 to G0 transition involved in cell differentiation [GO:0070315];negative regulation of cell population proliferation [GO:0008285];negative regulation of gene expression [GO:0010629];neural precursor cell proliferation [GO:0061351];adherens junction assembly [GO:0034333];cellular response to estradiol stimulus [GO:0071392];mammary gland epithelial cell differentiation [GO:0060644];negative regul…	nucleus [GO:0005634];cytoplasm [GO:0005737];nuclear matrix [GO:0016363];nucleus [GO:0005634];protein-containing complex [GO:0032991]	metal ion binding [GO:0046872];nucleic acid binding [GO:0003676];metal ion binding [GO:0046872];nucleic acid binding [GO:0003676];repressing transcription factor binding [GO:0070491]	GO:0003676;GO:0005634;GO:0008285;GO:0010629;GO:0046872;GO:0061351;GO:0070315;GO:0003676;GO:0005634;GO:0005737;GO:0006355;GO:0008284;GO:0010718;GO:0016363;GO:0017015;GO:0030335;GO:0032991;GO:0033601;GO:0034111;GO:0034333;GO:0045892;GO:0046872;GO:0051726;GO:0060644;GO:0060828;GO:0070491;GO:0071392
SRC	P12931	Proto-oncogene tyrosine-protein kinase Src	11	22.8	59.834	75.856	2.64314	0.741263	26.2488	26.427	26.2239	27.0359	26.062	25.7002	25.1679	25.4679	25.7058	25.5247	25.6588	25.4489	25.818	activation of protein kinase B activity [GO:0032148];adherens junction organization [GO:0034332];angiotensin-activated signaling pathway involved in heart process [GO:0086098];axon guidance [GO:0007411];bone resorption [GO:0045453];branching involved in mammary gland duct morphogenesis [GO:0060444];cell-cell adhesion [GO:0098609];cell cycle [GO:0007049];cell differentiation [GO:0030154];cell popu…	actin filament [GO:0005884];caveola [GO:0005901];cytoplasm [GO:0005737];cytosol [GO:0005829];extracellular exosome [GO:0070062];extrinsic component of cytoplasmic side of plasma membrane [GO:0031234];glutamatergic synapse [GO:0098978];late endosome [GO:0005770];lysosome [GO:0005764];mitochondrial inner membrane [GO:0005743];mitochondrion [GO:0005739];neuron projection [GO:0043005];nucleus [GO:000…	ATP binding [GO:0005524];BMP receptor binding [GO:0070700];cadherin binding [GO:0045296];connexin binding [GO:0071253];enzyme binding [GO:0019899];ephrin receptor binding [GO:0046875];estrogen receptor binding [GO:0030331];growth factor receptor binding [GO:0070851];heme binding [GO:0020037];insulin receptor binding [GO:0005158];integrin binding [GO:0005178];ion channel binding [GO:0044325];kinas…	GO:0001545;GO:0002102;GO:0002223;GO:0004672;GO:0004713;GO:0004715;GO:0005070;GO:0005080;GO:0005102;GO:0005158;GO:0005178;GO:0005524;GO:0005634;GO:0005737;GO:0005739;GO:0005743;GO:0005764;GO:0005770;GO:0005829;GO:0005884;GO:0005886;GO:0005901;GO:0007049;GO:0007165;GO:0007169;GO:0007172;GO:0007173;GO:0007179;GO:0007186;GO:0007229;GO:0007411;GO:0008022;GO:0008283;GO:0009612;GO:0009615;GO:0010447;GO:…
PPAP2B	O14495	Lipid phosphate phosphohydrolase 3	4	11.6	35.116	5.9357	1.37972	0.740661	26.0434	26.0972	26.2393	25.6779	26.9224	26.5698	24.9436	NaN	25.8757	25.8093	25.1739	26.4809	24.8227	canonical Wnt signaling pathway [GO:0060070];canonical Wnt signaling pathway involved in positive regulation of cell-cell adhesion [GO:0044329];canonical Wnt signaling pathway involved in positive regulation of endothelial cell migration [GO:0044328];canonical Wnt signaling pathway involved in positive regulation of wound healing [GO:0044330];germ cell migration [GO:0008354];homotypic cell-cell a…	adherens junction [GO:0005912];Golgi apparatus [GO:0005794];integral component of plasma membrane [GO:0005887];membrane [GO:0016020];plasma membrane [GO:0005886]	lipid phosphatase activity [GO:0042577];phosphatase activity [GO:0016791];phosphatidate phosphatase activity [GO:0008195];phosphoprotein phosphatase activity [GO:0004721];sphingosine-1-phosphate phosphatase activity [GO:0042392]	GO:0001933;GO:0004721;GO:0005794;GO:0005886;GO:0005887;GO:0005912;GO:0006629;GO:0006644;GO:0008195;GO:0008354;GO:0016020;GO:0016791;GO:0030111;GO:0030148;GO:0034109;GO:0042392;GO:0042577;GO:0044328;GO:0044329;GO:0044330;GO:0046839;GO:0050821;GO:0051091;GO:0060070
LAMP2	P13473	Lysosome-associated membrane glycoprotein 2	5	16.8	44.96	27.906	3.19575	0.739938	29.7887	29.7573	29.8755	30.2052	29.7003	29.8367	29.1284	28.4245	29.1959	29.4522	29.287	29.379	28.9779	autophagosome maturation [GO:0097352];cellular response to starvation [GO:0009267];chaperone-mediated autophagy [GO:0061684];establishment of protein localization to organelle [GO:0072594];lysosomal protein catabolic process [GO:1905146];muscle cell cellular homeostasis [GO:0046716];negative regulation of protein homooligomerization [GO:0032463];neutrophil degranulation [GO:0043312];platelet degr…	autolysosome [GO:0044754];azurophil granule membrane [GO:0035577];chaperone-mediated autophagy translocation complex [GO:0061742];extracellular exosome [GO:0070062];extracellular space [GO:0005615];ficolin-1-rich granule membrane [GO:0101003];integral component of autophagosome membrane [GO:0097637];late endosome [GO:0005770];late endosome membrane [GO:0031902];lysosomal lumen [GO:0043202];lysoso…	enzyme binding [GO:0019899];protein domain specific binding [GO:0019904]	GO:0002576;GO:0005615;GO:0005764;GO:0005765;GO:0005770;GO:0005802;GO:0005886;GO:0006605;GO:0009267;GO:0016020;GO:0017038;GO:0019899;GO:0019904;GO:0030670;GO:0031088;GO:0031647;GO:0031902;GO:0032463;GO:0035577;GO:0043202;GO:0043312;GO:0044754;GO:0045121;GO:0046716;GO:0048471;GO:0050821;GO:0061684;GO:0061740;GO:0061742;GO:0070062;GO:0072594;GO:0097352;GO:0097637;GO:0101003;GO:1905146;GO:1990836
C15orf52	Q6ZUT6	Uncharacterized protein C15orf52	4	10.3	57.324	8.5582	2.01857	0.739425	26.6698	27.4987	27.5082	27.2968	26.8104	26.9195	26.8824	26.465	26.453	25.8733	25.8451	NaN	26.748			RNA binding [GO:0003723]	GO:0003723
IDH2	P48735	Isocitrate dehydrogenase [NADP], mitochondrial	15	32.1	50.909	323.31	3.15198	0.737073	27.8941	27.6525	27.7058	27.8254	27.7171	27.1115	27.1397	27.1656	26.7038	26.4002	26.8866	26.9025	27.1996	2-oxoglutarate metabolic process [GO:0006103];carbohydrate metabolic process [GO:0005975];glyoxylate cycle [GO:0006097];isocitrate metabolic process [GO:0006102];NADP biosynthetic process [GO:0006741];NADP metabolic process [GO:0006739];negative regulation of glial cell migration [GO:1903976];negative regulation of glial cell proliferation [GO:0060253];negative regulation of matrix metallopeptida…	cytosol [GO:0005829];extracellular exosome [GO:0070062];mitochondrial matrix [GO:0005759];mitochondrion [GO:0005739];peroxisome [GO:0005777]	isocitrate dehydrogenase (NADP+) activity [GO:0004450];magnesium ion binding [GO:0000287];NAD binding [GO:0051287]	GO:0000287;GO:0004450;GO:0005739;GO:0005759;GO:0005777;GO:0005829;GO:0005975;GO:0006097;GO:0006099;GO:0006102;GO:0006103;GO:0006739;GO:0006741;GO:0051287;GO:0060253;GO:0070062;GO:1903976;GO:1904465
SEPT9	Q9UHD8	Septin-9	39	56.5	65.401	323.31	5.24947	0.735138	29.9496	29.9761	29.8253	30.171	29.8719	29.8886	29.0947	29.0839	29.2141	29.263	29.0957	29.119	29.6133	cytoskeleton-dependent cytokinesis [GO:0061640];positive regulation of non-motile cilium assembly [GO:1902857];protein heterooligomerization [GO:0051291]	actin cytoskeleton [GO:0015629];axoneme [GO:0005930];cytoplasm [GO:0005737];microtubule [GO:0005874];microtubule cytoskeleton [GO:0015630];non-motile cilium [GO:0097730];perinuclear region of cytoplasm [GO:0048471];septin complex [GO:0031105];septin ring [GO:0005940];stress fiber [GO:0001725]	cadherin binding [GO:0045296];GTPase activity [GO:0003924];GTP binding [GO:0005525]	GO:0001725;GO:0003924;GO:0005525;GO:0005737;GO:0005874;GO:0005930;GO:0005940;GO:0015629;GO:0015630;GO:0031105;GO:0045296;GO:0048471;GO:0051291;GO:0061640;GO:0097730;GO:1902857
PRKD2	Q9BZL6	Serine/threonine-protein kinase D2	4	6.7	96.721	17.596	2.55944	0.733918	22.8432	23.7479	23.0193	23.5949	23.8171	23.8815	22.6203	22.4621	23.0349	22.6896	22.9038	23.0079	22.5318	adaptive immune response [GO:0002250];angiogenesis [GO:0001525];cell adhesion [GO:0007155];cell death [GO:0008219];cellular response to vascular endothelial growth factor stimulus [GO:0035924];endothelial tube morphogenesis [GO:0061154];intracellular signal transduction [GO:0035556];peptidyl-serine phosphorylation [GO:0018105];peptidyl-threonine phosphorylation [GO:0018107];positive regulation of…	cytoplasm [GO:0005737];cytosol [GO:0005829];Golgi apparatus [GO:0005794];nucleoplasm [GO:0005654];nucleus [GO:0005634];plasma membrane [GO:0005886]	ATP binding [GO:0005524];metal ion binding [GO:0046872];protein kinase activity [GO:0004672];protein kinase C activity [GO:0004697];protein kinase C binding [GO:0005080];protein serine/threonine kinase activity [GO:0004674]	GO:0001525;GO:0001938;GO:0002250;GO:0004672;GO:0004674;GO:0004697;GO:0005080;GO:0005524;GO:0005634;GO:0005654;GO:0005737;GO:0005794;GO:0005829;GO:0005886;GO:0006468;GO:0007155;GO:0008219;GO:0010595;GO:0018105;GO:0018107;GO:0030148;GO:0030949;GO:0032743;GO:0032757;GO:0032793;GO:0033138;GO:0035556;GO:0035924;GO:0038033;GO:0043536;GO:0045743;GO:0045766;GO:0045785;GO:0045944;GO:0046777;GO:0046872;GO:…
RAB23	Q9ULC3	Ras-related protein Rab-23	9	32.5	26.659	323.31	3.14343	0.732571	26.4399	26.3645	26.4157	26.9665	27.0249	26.828	25.6656	25.7331	25.9552	25.6821	26.1005	26.044	26.4041	autophagosome assembly [GO:0000045];cellular defense response [GO:0006968];cilium assembly [GO:0060271];craniofacial suture morphogenesis [GO:0097094];GTP metabolic process [GO:0046039];intracellular protein transport [GO:0006886];negative regulation of protein import into nucleus [GO:0042308];Rab protein signal transduction [GO:0032482]	autophagosome [GO:0005776];cell junction [GO:0030054];centrosome [GO:0005813];cytoplasm [GO:0005737];cytosol [GO:0005829];endosome membrane [GO:0010008];phagocytic vesicle [GO:0045335];phagocytic vesicle membrane [GO:0030670];plasma membrane [GO:0005886]	GTPase activity [GO:0003924];GTP binding [GO:0005525]	GO:0000045;GO:0003924;GO:0005525;GO:0005737;GO:0005776;GO:0005813;GO:0005829;GO:0005886;GO:0006886;GO:0006968;GO:0010008;GO:0030054;GO:0030670;GO:0032482;GO:0042308;GO:0045335;GO:0046039;GO:0060271;GO:0097094
HNRNPL	P14866	Heterogeneous nuclear ribonucleoprotein L	7	20	64.132	17.861	2.5886	0.732161	25.2833	25.1775	NaN	25.5768	25.0178	25.0094	24.8329	24.0138	24.3316	24.4898	24.0682	24.749	24.8803	mRNA splicing, via spliceosome [GO:0000398];regulation of alternative mRNA splicing, via spliceosome [GO:0000381];RNA metabolic process [GO:0016070];RNA processing [GO:0006396]	cytoplasm [GO:0005737];extracellular exosome [GO:0070062];membrane [GO:0016020];nucleoplasm [GO:0005654];nucleus [GO:0005634];ribonucleoprotein complex [GO:1990904];ribonucleoprotein granule [GO:0035770]	pre-mRNA intronic binding [GO:0097157];RNA binding [GO:0003723];transcription regulatory region DNA binding [GO:0044212]	GO:0000381;GO:0000398;GO:0003723;GO:0005634;GO:0005654;GO:0005737;GO:0006396;GO:0016020;GO:0016070;GO:0035770;GO:0044212;GO:0070062;GO:0097157;GO:1990904
RP2	O75695	Protein XRP2	3	5.4	39.641	3.0783	2.28141	0.729441	NaN	25.8696	25.9217	26.0319	26.3796	25.857	25.1643	25.6613	25.0245	25.0769	24.9416	26.0595	25.0495	cell morphogenesis [GO:0000902];post-Golgi vesicle-mediated transport [GO:0006892];protein folding [GO:0006457];protein transport [GO:0015031];visual perception [GO:0007601]	centriole [GO:0005814];ciliary basal body [GO:0036064];cilium [GO:0005929];cytoplasm [GO:0005737];cytoplasmic vesicle [GO:0031410];extracellular exosome [GO:0070062];Golgi apparatus [GO:0005794];nuclear body [GO:0016604];nucleoplasm [GO:0005654];periciliary membrane compartment [GO:1990075];plasma membrane [GO:0005886]	GTPase activator activity [GO:0005096];GTP binding [GO:0005525];magnesium ion binding [GO:0000287];unfolded protein binding [GO:0051082]	GO:0000287;GO:0000902;GO:0005096;GO:0005525;GO:0005654;GO:0005737;GO:0005794;GO:0005814;GO:0005886;GO:0005929;GO:0006457;GO:0006892;GO:0007601;GO:0015031;GO:0016604;GO:0031410;GO:0036064;GO:0051082;GO:0070062;GO:1990075
PGM1	P36871	Phosphoglucomutase-1	21	45	61.448	323.31	1.77813	0.729251	27.7378	27.7907	28.0284	26.9826	26.7208	26.5483	26.3982	26.2617	26.6349	26.7708	26.9972	26.3278	26.6146	galactose catabolic process [GO:0019388];gluconeogenesis [GO:0006094];glucose metabolic process [GO:0006006];glycogen biosynthetic process [GO:0005978];glycogen catabolic process [GO:0005980];glycolytic process [GO:0006096];neutrophil degranulation [GO:0043312]	actin cytoskeleton [GO:0015629];cytoplasm [GO:0005737];cytosol [GO:0005829];extracellular exosome [GO:0070062];extracellular region [GO:0005576];ficolin-1-rich granule lumen [GO:1904813];tertiary granule lumen [GO:1904724]	magnesium ion binding [GO:0000287];phosphoglucomutase activity [GO:0004614]	GO:0000287;GO:0004614;GO:0005576;GO:0005737;GO:0005829;GO:0005978;GO:0005980;GO:0006006;GO:0006094;GO:0006096;GO:0015629;GO:0019388;GO:0043312;GO:0070062;GO:1904724;GO:1904813
ADD3	Q9UEY8	Gamma-adducin	14	27.9	79.154	323.31	1.41981	0.728772	26.2085	26.0423	25.9816	27.4748	27.3921	27.0988	25.5067	26.0068	25.811	25.917	25.6161	26.6952	26.2435	actin filament bundle assembly [GO:0051017];barbed-end actin filament capping [GO:0051016];transmembrane transport [GO:0055085]	brush border [GO:0005903];cell-cell junction [GO:0005911];cell cortex [GO:0005938];condensed nuclear chromosome [GO:0000794];cytoskeleton [GO:0005856];cytosol [GO:0005829];membrane [GO:0016020];nucleoplasm [GO:0005654];plasma membrane [GO:0005886];plasma membrane raft [GO:0044853];postsynaptic density [GO:0014069]	actin filament binding [GO:0051015];calmodulin binding [GO:0005516];spectrin binding [GO:0030507];structural constituent of cytoskeleton [GO:0005200];structural molecule activity [GO:0005198]	GO:0000794;GO:0005198;GO:0005200;GO:0005516;GO:0005654;GO:0005829;GO:0005856;GO:0005886;GO:0005903;GO:0005911;GO:0005938;GO:0014069;GO:0016020;GO:0030507;GO:0044853;GO:0051015;GO:0051016;GO:0051017;GO:0055085
MAP1S	Q66K74	Microtubule-associated protein 1S;MAP1S heavy chain;MAP1S light chain	17	20.6	112.21	140.97	5.91436	0.727375	26.0751	26.1313	26.1423	26.0163	25.8529	25.96	25.0926	25.293	25.5082	25.1555	25.2724	25.2979	25.4963	apoptotic process [GO:0006915];autophagy [GO:0006914];axonogenesis [GO:0007409];brain development [GO:0007420];dendrite development [GO:0016358];DNA metabolic process [GO:0006259];microtubule bundle formation [GO:0001578];microtubule cytoskeleton organization [GO:0000226];mitochondrion transport along microtubule [GO:0047497];nervous system development [GO:0007399];neuron projection morphogenesis…	cell junction [GO:0030054];cell projection [GO:0042995];cytosol [GO:0005829];dendrite [GO:0030425];microtubule [GO:0005874];microtubule associated complex [GO:0005875];neuronal cell body [GO:0043025];nucleolus [GO:0005730];nucleus [GO:0005634];perinuclear region of cytoplasm [GO:0048471];spindle [GO:0005819];synapse [GO:0045202]	actin binding [GO:0003779];actin filament binding [GO:0051015];beta-tubulin binding [GO:0048487];DNA binding [GO:0003677];identical protein binding [GO:0042802];microtubule binding [GO:0008017];tubulin binding [GO:0015631]	GO:0000226;GO:0001578;GO:0003677;GO:0003779;GO:0005634;GO:0005730;GO:0005819;GO:0005829;GO:0005874;GO:0005875;GO:0006259;GO:0006914;GO:0006915;GO:0007399;GO:0007409;GO:0007420;GO:0008017;GO:0010848;GO:0015631;GO:0016358;GO:0030054;GO:0030425;GO:0031114;GO:0042802;GO:0042995;GO:0043025;GO:0045202;GO:0047497;GO:0048471;GO:0048487;GO:0048812;GO:0051015
REPS1	Q96D71	RalBP1-associated Eps domain-containing protein 1	7	13.1	86.661	13.371	3.35518	0.724146	23.1942	23.5203	NaN	23.6949	23.2669	23.3873	22.7684	22.9255	22.8206	22.7986	22.1451	22.8068	22.5548	membrane organization [GO:0061024];receptor-mediated endocytosis [GO:0006898]	clathrin-coated pit [GO:0005905];cytosol [GO:0005829];plasma membrane [GO:0005886]	calcium ion binding [GO:0005509];SH3 domain binding [GO:0017124]	GO:0005509;GO:0005829;GO:0005886;GO:0005905;GO:0006898;GO:0017124;GO:0061024
ACOX2	Q99424	Peroxisomal acyl-coenzyme A oxidase 2	7	14.2	76.826	8.9728	1.53429	0.722564	23.571	23.996	23.2206	NaN	23.5634	23.3481	22.3873	23.7295	NaN	NaN	22.7848	22.496	22.6887	bile acid biosynthetic process [GO:0006699];fatty acid beta-oxidation using acyl-CoA oxidase [GO:0033540];lipid homeostasis [GO:0055088];positive regulation of cell death [GO:0010942];positive regulation of response to oxidative stress [GO:1902884];protein targeting to peroxisome [GO:0006625]	cytosol [GO:0005829];intracellular membrane-bounded organelle [GO:0043231];peroxisomal matrix [GO:0005782];peroxisome [GO:0005777]	3alpha,7alpha,12alpha-trihydroxy-5beta-cholestanoyl-CoA 24-hydroxylase activity [GO:0033791];acyl-CoA oxidase activity [GO:0003997];FAD binding [GO:0071949];fatty acid binding [GO:0005504];flavin adenine dinucleotide binding [GO:0050660];protein homodimerization activity [GO:0042803]	GO:0003997;GO:0005504;GO:0005777;GO:0005782;GO:0005829;GO:0006625;GO:0006699;GO:0010942;GO:0033540;GO:0033791;GO:0042803;GO:0043231;GO:0050660;GO:0055088;GO:0071949;GO:1902884
OSCP1	Q8WVF1	Protein OSCP1	3	9.3	44.586	6.3817	1.90797	0.721461	22.6043	22.3205	22.8399	22.3191	NaN	21.8849	NaN	21.0546	21.7668	NaN	21.7539	21.9044	21.8818	xenobiotic detoxification by transmembrane export across the plasma membrane [GO:1990961]	basal plasma membrane [GO:0009925];cytoplasm [GO:0005737]	transmembrane transporter activity [GO:0022857]	GO:0005737;GO:0009925;GO:0022857;GO:1990961
ALDH18A1	P54886	Delta-1-pyrroline-5-carboxylate synthase;Glutamate 5-kinase;Gamma-glutamyl phosphate reductase	27	37.5	87.301	323.31	3.80973	0.721116	27.3289	27.39	27.3996	27.8251	27.9079	27.8891	26.9813	26.5233	26.924	26.9767	27.0215	27.0616	26.8277	cellular amino acid biosynthetic process [GO:0008652];citrulline biosynthetic process [GO:0019240];glutamate metabolic process [GO:0006536];L-proline biosynthetic process [GO:0055129];ornithine biosynthetic process [GO:0006592];proline biosynthetic process [GO:0006561]	cytosol [GO:0005829];mitochondrial inner membrane [GO:0005743];mitochondrion [GO:0005739]	ATP binding [GO:0005524];glutamate 5-kinase activity [GO:0004349];glutamate-5-semialdehyde dehydrogenase activity [GO:0004350];identical protein binding [GO:0042802];RNA binding [GO:0003723]	GO:0003723;GO:0004349;GO:0004350;GO:0005524;GO:0005739;GO:0005743;GO:0005829;GO:0006536;GO:0006561;GO:0006592;GO:0008652;GO:0019240;GO:0042802;GO:0055129
FAM134A	Q8NC44	Protein FAM134A	4	12.5	57.829	158.22	3.16913	0.719529	24.763	24.6157	NaN	24.9099	NaN	24.577	24.2319	23.6055	23.9086	23.9971	24.3669	24.0613	23.807		integral component of membrane [GO:0016021]		GO:0016021
SRGAP1	Q7Z6B7	SLIT-ROBO Rho GTPase-activating protein 1	17	22.3	124.26	302.43	4.18529	0.715514	25.3115	25.6437	25.1784	25.4848	25.1958	25.3837	24.952	24.7342	24.7668	24.527	24.2229	24.6947	24.658	negative regulation of cell migration [GO:0030336];regulation of small GTPase mediated signal transduction [GO:0051056];signal transduction [GO:0007165]	cytoplasm [GO:0005737];cytosol [GO:0005829]	GTPase activator activity [GO:0005096];Rac GTPase binding [GO:0048365]	GO:0005096;GO:0005737;GO:0005829;GO:0007165;GO:0030336;GO:0048365;GO:0051056
MICAL3	Q7RTP6	Protein-methionine sulfoxide oxidase MICAL3	16	11.6	224.29	97.323	3.35198	0.714697	24.0558	24.2949	24.2816	NaN	23.8794	23.8143	23.6775	22.9485	23.117	23.4262	23.5087	23.467	23.3087	actin filament depolymerization [GO:0030042];cell cycle [GO:0007049];cell division [GO:0051301];cytoskeleton organization [GO:0007010];exocytosis [GO:0006887];oxidation-reduction process [GO:0055114]	cell cortex [GO:0005938];cell projection [GO:0042995];cytosol [GO:0005829];midbody [GO:0030496];nucleoplasm [GO:0005654];nucleus [GO:0005634];plasma membrane [GO:0005886];spindle [GO:0005819]	actin binding [GO:0003779];FAD binding [GO:0071949];metal ion binding [GO:0046872];oxidoreductase activity, acting on paired donors, with incorporation or reduction of molecular oxygen, NAD(P)H as one donor, and incorporation of one atom of oxygen [GO:0016709];Rab GTPase binding [GO:0017137]	GO:0003779;GO:0005634;GO:0005654;GO:0005819;GO:0005829;GO:0005886;GO:0005938;GO:0006887;GO:0007010;GO:0007049;GO:0016709;GO:0017137;GO:0030042;GO:0030496;GO:0042995;GO:0046872;GO:0051301;GO:0055114;GO:0071949
HMGCL	P35914	Hydroxymethylglutaryl-CoA lyase, mitochondrial	5	19.7	34.36	40.938	3.04625	0.710576	24.2261	24.575	24.6797	25.0694	24.9842	24.698	24.5168	23.9149	24.1939	23.7886	23.879	23.8706	23.8	acyl-CoA metabolic process [GO:0006637];ketone body biosynthetic process [GO:0046951];leucine catabolic process [GO:0006552];lipid metabolic process [GO:0006629];liver development [GO:0001889];mitochondrion organization [GO:0007005];protein targeting to peroxisome [GO:0006625];protein tetramerization [GO:0051262];response to fatty acid [GO:0070542];response to nutrient [GO:0007584];response to st…	cytosol [GO:0005829];mitochondrial matrix [GO:0005759];mitochondrion [GO:0005739];peroxisomal matrix [GO:0005782];peroxisome [GO:0005777]	carboxylic acid binding [GO:0031406];fatty-acyl-CoA binding [GO:0000062];hydroxymethylglutaryl-CoA lyase activity [GO:0004419];magnesium ion binding [GO:0000287];manganese ion binding [GO:0030145];metal ion binding [GO:0046872];protein homodimerization activity [GO:0042803]	GO:0000062;GO:0000287;GO:0001889;GO:0004419;GO:0005739;GO:0005759;GO:0005777;GO:0005782;GO:0005829;GO:0006552;GO:0006625;GO:0006629;GO:0006637;GO:0007005;GO:0007584;GO:0030145;GO:0031406;GO:0042594;GO:0042803;GO:0046872;GO:0046951;GO:0051262;GO:0070542
SBF2	Q86WG5	Myotubularin-related protein 13	15	10.4	208.46	14.444	2.41245	0.704137	24.0214	24.098	24.2854	24.0419	23.2133	23.6056	23.249	NaN	23.284	23.4979	22.9606	22.8314	23.2178	autophagy [GO:0006914];myelination [GO:0042552];protein tetramerization [GO:0051262];regulation of GTPase activity [GO:0043087]	axon [GO:0030424];cytosol [GO:0005829];endosome membrane [GO:0010008];membrane [GO:0016020];perinuclear region of cytoplasm [GO:0048471];vacuolar membrane [GO:0005774]	phosphatase binding [GO:0019902];phosphatase regulator activity [GO:0019208];phosphatidylinositol binding [GO:0035091];Rab guanyl-nucleotide exchange factor activity [GO:0017112]	GO:0005774;GO:0005829;GO:0006914;GO:0010008;GO:0016020;GO:0017112;GO:0019208;GO:0019902;GO:0030424;GO:0035091;GO:0042552;GO:0043087;GO:0048471;GO:0051262
AIDA	Q96BJ3	Axin interactor, dorsalization-associated protein	12	44.1	35.023	323.31	5.17792	0.702931	26.4474	26.3799	26.4297	26.3245	26.496	26.1866	25.6851	25.5106	25.9608	25.4629	25.5077	25.7593	25.8346	determination of ventral identity [GO:0048264];dorsal/ventral pattern formation [GO:0009953];negative regulation of JNK cascade [GO:0046329];negative regulation of JUN kinase activity [GO:0043508];regulation of protein homodimerization activity [GO:0043496]	cytoplasm [GO:0005737];membrane [GO:0016020]	phosphatidylinositol binding [GO:0035091];protein domain specific binding [GO:0019904]	GO:0005737;GO:0009953;GO:0016020;GO:0019904;GO:0035091;GO:0043496;GO:0043508;GO:0046329;GO:0048264
NAGLU	P54802	Alpha-N-acetylglucosaminidase;Alpha-N-acetylglucosaminidase 82 kDa form;Alpha-N-acetylglucosaminidase 77 kDa form	13	21.4	82.265	36.008	2.74334	0.699193	25.2561	24.796	25.0761	25.1719	25.0198	24.7721	24.5219	24.492	24.3548	23.5752	24.0846	24.4977	24.6869	cerebellar Purkinje cell layer development [GO:0021680];glycosaminoglycan catabolic process [GO:0006027];inner ear receptor cell development [GO:0060119];locomotor rhythm [GO:0045475];lysosome organization [GO:0007040];middle ear morphogenesis [GO:0042474];nervous system development [GO:0007399];retinal rod cell development [GO:0046548]	extracellular exosome [GO:0070062];lysosomal lumen [GO:0043202];lysosome [GO:0005764]	alpha-N-acetylglucosaminidase activity [GO:0004561]	GO:0004561;GO:0005764;GO:0006027;GO:0007040;GO:0007399;GO:0021680;GO:0042474;GO:0043202;GO:0045475;GO:0046548;GO:0060119;GO:0070062
MVB12A	Q96EY5	Multivesicular body subunit 12A	4	23.8	28.783	7.1986	1.66141	0.689412	23.944	24.1221	24.3358	24.1254	NaN	23.9303	NaN	22.5929	24.0167	23.513	NaN	23.5453	23.3426	endosomal transport [GO:0016197];endosome to lysosome transport via multivesicular body sorting pathway [GO:0032510];intracellular transport of virus [GO:0075733];macroautophagy [GO:0016236];multivesicular body assembly [GO:0036258];protein transport [GO:0015031];receptor catabolic process [GO:0032801];regulation of epidermal growth factor receptor signaling pathway [GO:0042058];ubiquitin-depende…	centrosome [GO:0005813];cytosol [GO:0005829];endosome membrane [GO:0010008];ESCRT I complex [GO:0000813];extracellular exosome [GO:0070062];Golgi apparatus [GO:0005794];host cell [GO:0043657];late endosome membrane [GO:0031902];nucleoplasm [GO:0005654];vesicle [GO:0031982]	lipid binding [GO:0008289];SH3 domain binding [GO:0017124];ubiquitin binding [GO:0043130]	GO:0000813;GO:0005654;GO:0005794;GO:0005813;GO:0005829;GO:0008289;GO:0010008;GO:0015031;GO:0016197;GO:0016236;GO:0017124;GO:0019058;GO:0019075;GO:0031902;GO:0031982;GO:0032510;GO:0032801;GO:0036258;GO:0039702;GO:0042058;GO:0043130;GO:0043162;GO:0043657;GO:0046755;GO:0070062;GO:0075733
APOOL	Q6UXV4	MICOS complex subunit MIC27	5	28	29.159	7.7139	1.70303	0.689302	NaN	24.9443	24.9377	25.6954	24.6425	24.6033	23.4358	24.1707	24.4387	24.5964	24.1944	24.4054	24.6859	cristae formation [GO:0042407];platelet degranulation [GO:0002576]	extracellular region [GO:0005576];MICOS complex [GO:0061617];mitochondrion [GO:0005739];platelet alpha granule lumen [GO:0031093]		GO:0002576;GO:0005576;GO:0005739;GO:0031093;GO:0042407;GO:0061617
FMN2	Q9NZ56	Formin-2	18	19	180.1	323.31	2.02417	0.688866	24.151	24.4231	24.3836	23.9391	23.7648	23.6023	24.059	23.8509	23.0935	22.8287	23.1193	23.2929	23.2416	cellular response to DNA damage stimulus [GO:0006974];cellular response to hypoxia [GO:0071456];establishment of meiotic spindle localization [GO:0051295];formin-nucleated actin cable assembly [GO:0070649];homologous chromosome movement towards spindle pole involved in homologous chromosome segregation [GO:0051758];intracellular signal transduction [GO:0035556];intracellular transport [GO:0046907…	cell cortex [GO:0005938];cytoplasm [GO:0005737];cytoplasmic vesicle membrane [GO:0030659];cytosol [GO:0005829];endoplasmic reticulum membrane [GO:0005789];microvillus [GO:0005902];nucleolus [GO:0005730];nucleus [GO:0005634];perinuclear region of cytoplasm [GO:0048471];plasma membrane [GO:0005886];spindle [GO:0005819]	actin binding [GO:0003779]	GO:0003779;GO:0005634;GO:0005730;GO:0005737;GO:0005789;GO:0005819;GO:0005829;GO:0005886;GO:0005902;GO:0005938;GO:0006974;GO:0007275;GO:0015031;GO:0016192;GO:0030659;GO:0035556;GO:0040038;GO:0042177;GO:0043066;GO:0046907;GO:0048471;GO:0048477;GO:0051127;GO:0051295;GO:0051758;GO:0070649;GO:0071456;GO:2000781
WFS1	O76024	Wolframin	9	13.5	100.29	59.024	4.28683	0.682176	24.3737	24.3709	24.1914	24.5097	24.4424	24.3152	23.7493	24.0094	23.5711	23.6725	23.7755	23.2323	23.7852	calcium ion homeostasis [GO:0055074];cellular protein metabolic process [GO:0044267];endoplasmic reticulum calcium ion homeostasis [GO:0032469];ER overload response [GO:0006983];glucose homeostasis [GO:0042593];IRE1-mediated unfolded protein response [GO:0036498];kidney development [GO:0001822];negative regulation of ATF6-mediated unfolded protein response [GO:1903892];negative regulation of DNA-…	dendrite [GO:0030425];endoplasmic reticulum [GO:0005783];endoplasmic reticulum lumen [GO:0005788];endoplasmic reticulum membrane [GO:0005789];integral component of endoplasmic reticulum membrane [GO:0030176];integral component of synaptic vesicle membrane [GO:0030285]	activating transcription factor binding [GO:0033613];ATPase binding [GO:0051117];calcium-dependent protein binding [GO:0048306];calmodulin binding [GO:0005516];proteasome binding [GO:0070628];ubiquitin protein ligase binding [GO:0031625]	GO:0000122;GO:0001822;GO:0003091;GO:0005516;GO:0005783;GO:0005788;GO:0005789;GO:0006983;GO:0007601;GO:0007605;GO:0022417;GO:0030176;GO:0030285;GO:0030425;GO:0030433;GO:0031016;GO:0031398;GO:0031625;GO:0032469;GO:0033613;GO:0034976;GO:0036498;GO:0042048;GO:0042593;GO:0043069;GO:0043433;GO:0043524;GO:0043687;GO:0044267;GO:0045927;GO:0048306;GO:0050821;GO:0050877;GO:0051117;GO:0051247;GO:0051928;GO:…
NRP1	O14786	Neuropilin-1	8	14.5	103.13	175.75	1.98564	0.681205	24.9616	25.4099	25.4953	24.7799	24.5878	24.6065	24.5045	24.3809	24.1572	24.3244	24.1108	24.9326	23.6356	actin cytoskeleton reorganization [GO:0031532];angiogenesis [GO:0001525];angiogenesis involved in coronary vascular morphogenesis [GO:0060978];animal organ morphogenesis [GO:0009887];artery morphogenesis [GO:0048844];axonal fasciculation [GO:0007413];axon extension involved in axon guidance [GO:0048846];axon guidance [GO:0007411];axonogenesis involved in innervation [GO:0060385];basal dendrite ar…	axon [GO:0030424];cell surface [GO:0009986];cytoplasmic vesicle [GO:0031410];cytosol [GO:0005829];early endosome [GO:0005769];extracellular space [GO:0005615];focal adhesion [GO:0005925];glutamatergic synapse [GO:0098978];growth cone [GO:0030426];integral component of postsynaptic membrane [GO:0099055];neurofilament [GO:0005883];neuronal cell body [GO:0043025];neuron projection [GO:0043005];plasm…	coreceptor activity [GO:0015026];cytokine binding [GO:0019955];growth factor binding [GO:0019838];GTPase activator activity [GO:0005096];heparin binding [GO:0008201];metal ion binding [GO:0046872];protein kinase binding [GO:0019901];semaphorin receptor activity [GO:0017154];vascular endothelial growth factor-activated receptor activity [GO:0005021];vascular endothelial growth factor binding [GO:0…	GO:0001525;GO:0001569;GO:0001764;GO:0001938;GO:0002040;GO:0002042;GO:0002116;GO:0003148;GO:0005021;GO:0005096;GO:0005615;GO:0005769;GO:0005829;GO:0005883;GO:0005886;GO:0005925;GO:0006930;GO:0007165;GO:0007229;GO:0007267;GO:0007411;GO:0007413;GO:0008201;GO:0009611;GO:0009887;GO:0009986;GO:0010595;GO:0014911;GO:0015026;GO:0017154;GO:0019838;GO:0019901;GO:0019955;GO:0021612;GO:0021637;GO:0021649;GO:…
TMX4	Q9H1E5	Thioredoxin-related transmembrane protein 4	5	20.6	38.952	18.319	1.52359	0.679329	25.6204	25.6313	25.4427	NaN	25.3926	25.1988	NaN	25.3666	NaN	24.08	NaN	24.7787	24.8861	cell redox homeostasis [GO:0045454];oxidation-reduction process [GO:0055114]	integral component of membrane [GO:0016021];nuclear inner membrane [GO:0005637]		GO:0005637;GO:0016021;GO:0045454;GO:0055114
G3BP2	Q9UN86	Ras GTPase-activating protein-binding protein 2	10	29.9	54.12	146.14	1.56402	0.67795	26.0562	26.1722	26.1241	26.0205	26.102	25.447	25.8156	24.0087	25.6313	25.3559	25.2752	25.5518	25.525	cytoplasmic sequestering of NF-kappaB [GO:0007253];innate immune response [GO:0045087];mRNA transport [GO:0051028];positive regulation of stress granule assembly [GO:0062029];protein homooligomerization [GO:0051260];Ras protein signal transduction [GO:0007265];stress granule assembly [GO:0034063];viral process [GO:0016032]	cytoplasm [GO:0005737];cytoplasmic stress granule [GO:0010494];cytosol [GO:0005829];ribonucleoprotein complex [GO:1990904]	mRNA binding [GO:0003729];receptor signaling complex adaptor activity [GO:0030159];RNA binding [GO:0003723]	GO:0003723;GO:0003729;GO:0005737;GO:0005829;GO:0007253;GO:0007265;GO:0010494;GO:0016032;GO:0030159;GO:0034063;GO:0045087;GO:0051028;GO:0051260;GO:0062029;GO:1990904
LMNA	P02545	Prelamin-A/C;Lamin-A/C	41	50.2	74.139	323.31	2.49067	0.674865	27.9406	27.9562	28.1878	28.8369	28.609	28.3086	28.0282	27.5187	27.384	27.8551	27.1869	27.8062	27.6424	cellular protein localization [GO:0034613];cellular response to hypoxia [GO:0071456];establishment or maintenance of microtubule cytoskeleton polarity [GO:0030951];IRE1-mediated unfolded protein response [GO:0036498];mitotic nuclear envelope reassembly [GO:0007084];muscle organ development [GO:0007517];negative regulation of cardiac muscle hypertrophy in response to stress [GO:1903243];negative r…	cytosol [GO:0005829];intermediate filament [GO:0005882];lamin filament [GO:0005638];nuclear envelope [GO:0005635];nuclear lamina [GO:0005652];nuclear membrane [GO:0031965];nuclear speck [GO:0016607];nucleoplasm [GO:0005654];nucleus [GO:0005634];perinuclear region of cytoplasm [GO:0048471]	identical protein binding [GO:0042802];structural molecule activity [GO:0005198]	GO:0005198;GO:0005634;GO:0005635;GO:0005638;GO:0005652;GO:0005654;GO:0005829;GO:0005882;GO:0006606;GO:0006998;GO:0007084;GO:0007517;GO:0008285;GO:0010628;GO:0016607;GO:0030334;GO:0030951;GO:0031647;GO:0031965;GO:0032204;GO:0034504;GO:0034613;GO:0036498;GO:0042802;GO:0048471;GO:0055015;GO:0071456;GO:0072201;GO:0090201;GO:0090343;GO:1900114;GO:1900180;GO:1903243;GO:2001237
DBN1	Q16643	Drebrin	22	40.7	71.428	323.31	1.31205	0.673783	28.491	28.4243	28.3123	29.5382	29.5432	29.5484	28.0245	28.8655	28.2844	27.4289	28.3345	28.4962	28.6832	actin filament organization [GO:0007015];cell communication by chemical coupling [GO:0010643];cell communication by electrical coupling [GO:0010644];cytoplasmic sequestering of protein [GO:0051220];in utero embryonic development [GO:0001701];maintenance of protein location in cell [GO:0032507];neural precursor cell proliferation [GO:0061351];neuron projection morphogenesis [GO:0048812];positive r…	actin cytoskeleton [GO:0015629];actomyosin [GO:0042641];cortical actin cytoskeleton [GO:0030864];cortical cytoskeleton [GO:0030863];cytoplasm [GO:0005737];cytoskeleton [GO:0005856];dendrite [GO:0030425];gap junction [GO:0005921];glutamatergic synapse [GO:0098978];growth cone [GO:0030426];lamellipodium [GO:0030027];plasma membrane [GO:0005886];postsynaptic cytosol [GO:0099524];postsynaptic density…	actin binding [GO:0003779];actin filament binding [GO:0051015];cadherin binding [GO:0045296];profilin binding [GO:0005522]	GO:0001701;GO:0003779;GO:0005522;GO:0005737;GO:0005856;GO:0005886;GO:0005921;GO:0007015;GO:0010643;GO:0010644;GO:0014069;GO:0015629;GO:0030027;GO:0030425;GO:0030426;GO:0030427;GO:0030833;GO:0030863;GO:0030864;GO:0031915;GO:0032507;GO:0042641;GO:0045211;GO:0045296;GO:0045773;GO:0048168;GO:0048812;GO:0050773;GO:0051015;GO:0051220;GO:0061003;GO:0061351;GO:0098974;GO:0098978;GO:0099524;GO:1902685
LEMD2	Q8NC56	LEM domain-containing protein 2	9	21.3	56.974	18.899	1.83403	0.673086	24.5798	25.0567	24.499	23.8598	24.5372	24.574	23.8186	24.6797	23.9341	23.4923	23.3407	23.5901	24.0571	heart formation [GO:0060914];negative regulation of BMP signaling pathway [GO:0030514];negative regulation of MAPK cascade [GO:0043409];negative regulation of protein kinase B signaling [GO:0051898];neurogenesis [GO:0022008];nuclear envelope organization [GO:0006998];protein localization to chromatin [GO:0071168];skeletal muscle cell differentiation [GO:0035914]	integral component of membrane [GO:0016021];integral component of nuclear inner membrane [GO:0005639];membrane [GO:0016020];nuclear inner membrane [GO:0005637];nuclear membrane [GO:0031965]		GO:0005637;GO:0005639;GO:0006998;GO:0016020;GO:0016021;GO:0022008;GO:0030514;GO:0031965;GO:0035914;GO:0043409;GO:0051898;GO:0060914;GO:0071168
PDCD10	Q9BUL8	Programmed cell death protein 10	6	23.1	24.701	4.8685	2.58632	0.671976	26.3642	26.4584	26.9216	26.7096	26.3767	26.6958	25.9379	26.2265	NaN	25.962	25.4097	26.3268	25.6315	angiogenesis [GO:0001525];cellular response to leukemia inhibitory factor [GO:1990830];establishment of Golgi localization [GO:0051683];Golgi reassembly [GO:0090168];intrinsic apoptotic signaling pathway in response to hydrogen peroxide [GO:0036481];negative regulation of apoptotic process [GO:0043066];negative regulation of blood vessel endothelial cell proliferation involved in sprouting angiog…	cytoplasm [GO:0005737];cytosol [GO:0005829];extracellular exosome [GO:0070062];Golgi apparatus [GO:0005794];Golgi membrane [GO:0000139];plasma membrane [GO:0005886]	protein homodimerization activity [GO:0042803];protein kinase binding [GO:0019901];protein N-terminus binding [GO:0047485]	GO:0000139;GO:0001525;GO:0005737;GO:0005794;GO:0005829;GO:0005886;GO:0008284;GO:0010628;GO:0010629;GO:0019901;GO:0030335;GO:0032874;GO:0033138;GO:0036481;GO:0042542;GO:0042803;GO:0043066;GO:0043406;GO:0044319;GO:0045747;GO:0047485;GO:0050821;GO:0051683;GO:0070062;GO:0071902;GO:0090051;GO:0090168;GO:0090316;GO:1903588;GO:1990830
TBC1D9B	Q66K14	TBC1 domain family member 9B	17	18.4	140.52	323.31	3.95768	0.671213	25.2581	25.1326	24.9266	24.8311	24.9469	24.9463	24.18	24.1777	24.3788	24.6049	24.0085	24.6718	24.3284	activation of GTPase activity [GO:0090630];intracellular protein transport [GO:0006886]	cell [GO:0005623];integral component of membrane [GO:0016021]	calcium ion binding [GO:0005509];GTPase activator activity [GO:0005096];Rab GTPase binding [GO:0017137]	GO:0005096;GO:0005509;GO:0005623;GO:0006886;GO:0016021;GO:0017137;GO:0090630
STK25	O00506	Serine/threonine-protein kinase 25	7	15.7	48.111	11.921	1.72621	0.670502	24.0702	24.8306	24.2736	NaN	23.7101	23.6466	23.2133	23.187	23.6222	23.4116	23.2262	24.1558	23.2338	activation of protein kinase activity [GO:0032147];establishment of Golgi localization [GO:0051683];establishment or maintenance of cell polarity [GO:0007163];Golgi localization [GO:0051645];Golgi reassembly [GO:0090168];intrinsic apoptotic signaling pathway in response to hydrogen peroxide [GO:0036481];positive regulation of axonogenesis [GO:0050772];positive regulation of stress-activated MAPK …	cytoplasm [GO:0005737];extracellular exosome [GO:0070062];Golgi membrane [GO:0000139]	ATP binding [GO:0005524];metal ion binding [GO:0046872];protein homodimerization activity [GO:0042803];protein kinase activity [GO:0004672];protein serine/threonine kinase activity [GO:0004674]	GO:0000139;GO:0004672;GO:0004674;GO:0005524;GO:0005737;GO:0006468;GO:0006979;GO:0007163;GO:0007165;GO:0023014;GO:0031098;GO:0032147;GO:0032874;GO:0036481;GO:0042542;GO:0042803;GO:0046777;GO:0046872;GO:0050772;GO:0051645;GO:0051683;GO:0070062;GO:0090168
DNAJB2	P25686	DnaJ homolog subfamily B member 2	7	30.2	35.58	18.798	3.73196	0.669321	25.0699	25.3338	25.6056	25.6643	25.382	25.1015	24.6834	24.4041	24.9829	24.6704	24.7048	24.8547	24.5311	chaperone-mediated protein folding [GO:0061077];negative regulation of cell growth [GO:0030308];negative regulation of cell population proliferation [GO:0008285];negative regulation of inclusion body assembly [GO:0090084];negative regulation of protein binding [GO:0032091];negative regulation of protein deubiquitination [GO:0090086];neuron cellular homeostasis [GO:0070050];positive regulation of …	cytoplasm [GO:0005737];cytoplasmic side of endoplasmic reticulum membrane [GO:0098554];cytosol [GO:0005829];extrinsic component of endoplasmic reticulum membrane [GO:0042406];inclusion body [GO:0016234];intrinsic component of endoplasmic reticulum membrane [GO:0031227];nuclear membrane [GO:0031965];nucleus [GO:0005634];perinuclear region of cytoplasm [GO:0048471]	ATPase activator activity [GO:0001671];chaperone binding [GO:0051087];Hsp70 protein binding [GO:0030544];polyubiquitin modification-dependent protein binding [GO:0031593];proteasome binding [GO:0070628];ubiquitin binding [GO:0043130];ubiquitin-dependent protein binding [GO:0140036];ubiquitin protein ligase binding [GO:0031625];unfolded protein binding [GO:0051082]	GO:0001671;GO:0005634;GO:0005737;GO:0005829;GO:0006986;GO:0008285;GO:0016234;GO:0030308;GO:0030433;GO:0030544;GO:0031227;GO:0031396;GO:0031398;GO:0031593;GO:0031625;GO:0031965;GO:0032091;GO:0032436;GO:0032781;GO:0032880;GO:0042026;GO:0042406;GO:0043130;GO:0043161;GO:0048471;GO:0051082;GO:0051087;GO:0061077;GO:0070050;GO:0070628;GO:0090084;GO:0090086;GO:0098554;GO:0140036;GO:1903644
OGFOD3	Q6PK18	2-oxoglutarate and iron-dependent oxygenase domain-containing protein 3	3	14.1	35.646	12.657	1.61553	0.666676	24.518	24.4671	24.375	24.0192	24.3603	24.2991	24.1384	22.8997	24.0987	23.7868	23.8221	24.2113	22.7548		integral component of membrane [GO:0016021];membrane [GO:0016020]	dioxygenase activity [GO:0051213];iron ion binding [GO:0005506];L-ascorbic acid binding [GO:0031418];oxidoreductase activity, acting on paired donors, with incorporation or reduction of molecular oxygen [GO:0016705]	GO:0005506;GO:0016020;GO:0016021;GO:0016705;GO:0031418;GO:0051213
PRRC1	Q96M27	Protein PRRC1	5	20	46.701	75.231	2.21528	0.665078	28.1709	28.5513	28.7523	28.4971	28.0907	28.3251	27.7675	27.5218	27.9825	28.4621	27.3918	27.8176	27.1864	activation of protein kinase A activity [GO:0034199]	cytoplasm [GO:0005737];Golgi apparatus [GO:0005794]	protein kinase A regulatory subunit binding [GO:0034237]	GO:0005737;GO:0005794;GO:0034199;GO:0034237
RAB32	Q13637	Ras-related protein Rab-32	8	40.4	24.997	286.29	2.9492	0.661854	26.4817	26.6477	26.6847	26.4027	26.3906	26.2051	26.048	25.3147	25.9161	26.2325	25.6138	26.0095	25.5138	antigen processing and presentation [GO:0019882];endosome to melanosome transport [GO:0035646];intracellular protein transport [GO:0006886];melanosome assembly [GO:1903232];mitochondrion organization [GO:0007005];phagosome maturation [GO:0090382];protein localization to membrane [GO:0072657];Rab protein signal transduction [GO:0032482];vesicle-mediated transport [GO:0016192]	cytosol [GO:0005829];early endosome [GO:0005769];endoplasmic reticulum [GO:0005783];melanosome [GO:0042470];melanosome membrane [GO:0033162];membrane [GO:0016020];mitochondria-associated endoplasmic reticulum membrane [GO:0044233];mitochondrial outer membrane [GO:0005741];mitochondrion [GO:0005739];phagocytic vesicle [GO:0045335];phagocytic vesicle membrane [GO:0030670];trans-Golgi network [GO:00…	AP-1 adaptor complex binding [GO:0035650];AP-3 adaptor complex binding [GO:0035651];BLOC-2 complex binding [GO:0036461];GTPase activity [GO:0003924];GTP binding [GO:0005525];GTP-dependent protein binding [GO:0030742]	GO:0003924;GO:0005525;GO:0005739;GO:0005741;GO:0005769;GO:0005783;GO:0005802;GO:0005829;GO:0006886;GO:0007005;GO:0016020;GO:0016192;GO:0019882;GO:0030670;GO:0030742;GO:0032482;GO:0033162;GO:0035646;GO:0035650;GO:0035651;GO:0036461;GO:0042470;GO:0044233;GO:0045335;GO:0072657;GO:0090382;GO:1903232
EIF4A2	Q14240	Eukaryotic initiation factor 4A-II;Eukaryotic initiation factor 4A-II, N-terminally processed	16	41.5	46.402	47.303	2.57975	0.65915	27.8982	28.1435	28.0421	27.5937	27.9107	27.8841	27.6101	27.6636	26.8693	26.874	26.8565	27.3063	27.5904	cellular response to leukemia inhibitory factor [GO:1990830];cytoplasmic translational initiation [GO:0002183];negative regulation of RNA-directed 5'-3' RNA polymerase activity [GO:1900260];regulation of translational initiation [GO:0006446];translational initiation [GO:0006413];viral process [GO:0016032]	cytoplasmic stress granule [GO:0010494];cytosol [GO:0005829];eukaryotic translation initiation factor 4F complex [GO:0016281];perinuclear region of cytoplasm [GO:0048471]	ATPase activity [GO:0016887];ATP binding [GO:0005524];helicase activity [GO:0004386];RNA binding [GO:0003723];RNA helicase activity [GO:0003724];translation initiation factor activity [GO:0003743]	GO:0002183;GO:0003723;GO:0003724;GO:0003743;GO:0004386;GO:0005524;GO:0005829;GO:0006413;GO:0006446;GO:0010494;GO:0016032;GO:0016281;GO:0016887;GO:0048471;GO:1900260;GO:1990830
FAM8A1	Q9UBU6	Protein FAM8A1	3	10.7	44.123	6.3412	1.44614	0.657373	23.2224	NaN	24.0092	24.693	NaN	24.0922	23.1057	23.0623	23.7928	23.4416	23.0395	23.6514	23.3343		integral component of membrane [GO:0016021]		GO:0016021
SEPT6	Q14141	Septin-6	12	34.6	49.716	269.22	1.60551	0.657196	24.147	24.577	24.5001	24.6428	24.8487	24.6832	23.372	NaN	23.9439	23.9841	24.5575	24.4479	23.1504	cell differentiation [GO:0030154];cilium assembly [GO:0060271];cytoskeleton-dependent cytokinesis [GO:0061640];mitotic cytokinesis [GO:0000281];spermatogenesis [GO:0007283];viral process [GO:0016032]	axon terminus [GO:0043679];cleavage furrow [GO:0032154];condensed chromosome kinetochore [GO:0000777];microtubule cytoskeleton [GO:0015630];midbody [GO:0030496];septin collar [GO:0032173];septin complex [GO:0031105];septin ring [GO:0005940];sperm annulus [GO:0097227];spindle [GO:0005819];synaptic vesicle [GO:0008021]	GTPase activity [GO:0003924];GTP binding [GO:0005525]	GO:0000281;GO:0000777;GO:0003924;GO:0005525;GO:0005819;GO:0005940;GO:0007283;GO:0008021;GO:0015630;GO:0016032;GO:0030154;GO:0030496;GO:0031105;GO:0032154;GO:0032173;GO:0043679;GO:0060271;GO:0061640;GO:0097227
SLC12A2	P55011	Solute carrier family 12 member 2	19	24.2	131.45	103.56	3.19618	0.651863	24.6434	24.9067	24.8354	24.8631	24.9508	24.9708	24.5071	23.7608	24.3699	24.5133	24.0483	24.4216	23.8479	aging [GO:0007568];ammonium transport [GO:0015696];cellular response to chemokine [GO:1990869];cell volume homeostasis [GO:0006884];chloride ion homeostasis [GO:0055064];chloride transmembrane transport [GO:1902476];gamma-aminobutyric acid signaling pathway [GO:0007214];hyperosmotic response [GO:0006972];ion transport [GO:0006811];positive regulation of cell volume [GO:0045795];potassium ion home…	apical plasma membrane [GO:0016324];extracellular exosome [GO:0070062];extracellular vesicle [GO:1903561];integral component of plasma membrane [GO:0005887];membrane [GO:0016020];plasma membrane [GO:0005886]	ammonium transmembrane transporter activity [GO:0008519];potassium:chloride symporter activity [GO:0015379];protein kinase binding [GO:0019901];sodium:chloride symporter activity [GO:0015378];sodium:potassium:chloride symporter activity [GO:0008511];sodium ion transmembrane transporter activity [GO:0015081]	GO:0005886;GO:0005887;GO:0006811;GO:0006884;GO:0006972;GO:0007214;GO:0007568;GO:0008511;GO:0008519;GO:0010818;GO:0015081;GO:0015378;GO:0015379;GO:0015696;GO:0016020;GO:0016324;GO:0019901;GO:0030321;GO:0035725;GO:0045795;GO:0055064;GO:0055075;GO:0055078;GO:0070062;GO:0070634;GO:1902476;GO:1903561;GO:1990573;GO:1990869
CDC42BPB	Q9Y5S2	Serine/threonine-protein kinase MRCK beta	29	18.7	194.31	323.31	4.17188	0.651269	25.7292	25.712	25.7033	25.8306	25.623	25.3584	25.0924	24.962	25.0471	24.7209	24.7912	25.099	25.3443	actin cytoskeleton reorganization [GO:0031532];actomyosin structure organization [GO:0031032];cell migration [GO:0016477];cytoskeleton organization [GO:0007010];establishment or maintenance of cell polarity [GO:0007163];intracellular signal transduction [GO:0035556];peptidyl-threonine phosphorylation [GO:0018107];protein phosphorylation [GO:0006468];signal transduction [GO:0007165]	actomyosin [GO:0042641];cell-cell junction [GO:0005911];cell leading edge [GO:0031252];cytoplasm [GO:0005737];cytoskeleton [GO:0005856];extracellular exosome [GO:0070062];lamellipodium [GO:0030027];plasma membrane [GO:0005886]	ATP binding [GO:0005524];magnesium ion binding [GO:0000287];protein-containing complex binding [GO:0044877];protein kinase activity [GO:0004672];protein serine/threonine kinase activity [GO:0004674];Rho GTPase binding [GO:0017048]	GO:0000287;GO:0004672;GO:0004674;GO:0005524;GO:0005737;GO:0005856;GO:0005886;GO:0005911;GO:0006468;GO:0007010;GO:0007163;GO:0007165;GO:0016477;GO:0017048;GO:0018107;GO:0030027;GO:0031032;GO:0031252;GO:0031532;GO:0035556;GO:0042641;GO:0044877;GO:0070062
PDZD8	Q8NEN9	PDZ domain-containing protein 8	9	11.3	128.56	95.116	2.99831	0.64788	NaN	23.0763	NaN	23.4193	23.3893	23.2667	22.4198	22.4722	NaN	22.8912	NaN	22.7372	22.6797	cytoskeleton organization [GO:0007010];intracellular signal transduction [GO:0035556];lipid transport [GO:0006869];mitochondrial calcium ion homeostasis [GO:0051560];mitochondrion-endoplasmic reticulum membrane tethering [GO:1990456];regulation of cell morphogenesis [GO:0022604];viral process [GO:0016032]	endoplasmic reticulum membrane [GO:0005789];integral component of membrane [GO:0016021];membrane [GO:0016020];mitochondria-associated endoplasmic reticulum membrane [GO:0044233];mitochondrion [GO:0005739]	lipid binding [GO:0008289];metal ion binding [GO:0046872]	GO:0005739;GO:0005789;GO:0006869;GO:0007010;GO:0008289;GO:0016020;GO:0016021;GO:0016032;GO:0022604;GO:0035556;GO:0044233;GO:0046872;GO:0051560;GO:1990456
MOGS	Q13724	Mannosyl-oligosaccharide glucosidase	13	19.2	91.916	315.4	3.50891	0.647633	26.7279	26.9786	26.7768	26.8707	26.7864	26.4588	26.2217	25.7615	26.4851	25.8404	26.0069	26.3049	26.2119	oligosaccharide metabolic process [GO:0009311];protein folding [GO:0006457];protein N-linked glycosylation [GO:0006487]	endoplasmic reticulum [GO:0005783];endoplasmic reticulum membrane [GO:0005789];extracellular exosome [GO:0070062];integral component of membrane [GO:0016021];membrane [GO:0016020]	glucosidase activity [GO:0015926];mannosyl-oligosaccharide glucosidase activity [GO:0004573]	GO:0004573;GO:0005783;GO:0005789;GO:0006457;GO:0006487;GO:0009311;GO:0015926;GO:0016020;GO:0016021;GO:0070062
MXRA7	P84157	Matrix-remodeling-associated protein 7	6	35.3	21.466	323.31	1.93477	0.647043	26.5467	26.7818	26.2643	25.4184	26.4875	25.9647	25.598	26.0322	25.5859	25.598	25.7928	25.2242	25.347		collagen-containing extracellular matrix [GO:0062023];integral component of membrane [GO:0016021]		GO:0016021;GO:0062023
CAB39	Q9Y376	Calcium-binding protein 39	8	21.7	39.869	23.998	1.44838	0.644408	24.5529	NaN	24.4837	NaN	25.3035	24.3352	NaN	24.2487	23.9672	23.3109	24.1862	24.3338	24.0996	cell cycle arrest [GO:0007050];cellular hypotonic response [GO:0071476];intracellular signal transduction [GO:0035556];negative regulation of potassium ion transmembrane transport [GO:1901380];negative regulation of potassium ion transmembrane transporter activity [GO:1901017];neutrophil degranulation [GO:0043312];peptidyl-serine phosphorylation [GO:0018105];positive regulation of peptidyl-threon…	cytosol [GO:0005829];extracellular exosome [GO:0070062];extracellular region [GO:0005576];ficolin-1-rich granule lumen [GO:1904813];secretory granule lumen [GO:0034774];serine/threonine protein kinase complex [GO:1902554]	kinase binding [GO:0019900];protein kinase activator activity [GO:0030295];protein serine/threonine kinase activator activity [GO:0043539];protein serine/threonine kinase activity [GO:0004674]	GO:0004674;GO:0005576;GO:0005829;GO:0007050;GO:0010800;GO:0018105;GO:0019900;GO:0023014;GO:0030295;GO:0034774;GO:0035556;GO:0043312;GO:0043539;GO:0051291;GO:0070062;GO:0071476;GO:0071902;GO:1901017;GO:1901380;GO:1902554;GO:1904813
PYCR2	Q96C36	Pyrroline-5-carboxylate reductase 2	5	19.7	33.637	107.74	1.89997	0.644139	23.7661	24.0471	23.9663	24.9903	24.2645	24.8995	23.6171	23.8296	23.7346	23.6503	24.1037	23.4744	23.3374	cellular amino acid biosynthetic process [GO:0008652];cellular response to oxidative stress [GO:0034599];L-proline biosynthetic process [GO:0055129];proline biosynthetic process [GO:0006561]	mitochondrial matrix [GO:0005759];mitochondrion [GO:0005739]	pyrroline-5-carboxylate reductase activity [GO:0004735]	GO:0004735;GO:0005739;GO:0005759;GO:0006561;GO:0008652;GO:0034599;GO:0055129
ESYT2	A0FGR8	Extended synaptotagmin-2	21	30.6	102.36	227.54	3.49372	0.641108	28.6878	28.7001	28.751	28.483	28.311	28.2167	27.7821	27.5552	28.087	28.093	27.635	28.0235	28.0112	endocytosis [GO:0006897];endoplasmic reticulum-plasma membrane tethering [GO:0061817];glycosphingolipid metabolic process [GO:0006687];lipid transport [GO:0006869]	endoplasmic reticulum membrane [GO:0005789];endoplasmic reticulum-plasma membrane contact site [GO:0140268];extrinsic component of cytoplasmic side of plasma membrane [GO:0031234];integral component of plasma membrane [GO:0005887];intrinsic component of endoplasmic reticulum membrane [GO:0031227];membrane [GO:0016020];organelle membrane contact site [GO:0044232]	cadherin binding [GO:0045296];calcium-dependent phospholipid binding [GO:0005544];calcium ion binding [GO:0005509];identical protein binding [GO:0042802];phosphatidylcholine binding [GO:0031210];phosphatidylethanolamine binding [GO:0008429];phosphatidylinositol binding [GO:0035091]	GO:0005509;GO:0005544;GO:0005789;GO:0005887;GO:0006687;GO:0006869;GO:0006897;GO:0008429;GO:0016020;GO:0031210;GO:0031227;GO:0031234;GO:0035091;GO:0042802;GO:0044232;GO:0045296;GO:0061817;GO:0140268
CNN2	Q99439	Calponin-2	12	57.3	33.697	26.862	1.43004	0.640098	29.4891	29.3486	29.6958	28.9142	28.7971	28.1853	28.8204	28.8454	28.6671	28.2177	28.0495	27.7641	28.657	actomyosin structure organization [GO:0031032];cellular response to mechanical stimulus [GO:0071260];cytoskeleton organization [GO:0007010];interleukin-12-mediated signaling pathway [GO:0035722];neutrophil degranulation [GO:0043312];regulation of actin filament-based process [GO:0032970]	cell-cell junction [GO:0005911];cytoskeleton [GO:0005856];extracellular region [GO:0005576];focal adhesion [GO:0005925];membrane [GO:0016020];specific granule lumen [GO:0035580];stress fiber [GO:0001725];tertiary granule lumen [GO:1904724]	actin binding [GO:0003779];cadherin binding [GO:0045296];calmodulin binding [GO:0005516]	GO:0001725;GO:0003779;GO:0005516;GO:0005576;GO:0005856;GO:0005911;GO:0005925;GO:0007010;GO:0016020;GO:0031032;GO:0032970;GO:0035580;GO:0035722;GO:0043312;GO:0045296;GO:0071260;GO:1904724
PTPN9	P43378	Tyrosine-protein phosphatase non-receptor type 9	6	11.1	68.019	66.371	3.94226	0.638891	22.8889	23.2647	23.1338	23.0894	22.9972	22.942	22.6631	22.3046	22.5494	22.1948	NaN	NaN	22.357	cellular response to cytokine stimulus [GO:0071345];negative regulation of neuron projection development [GO:0010977];peptidyl-tyrosine dephosphorylation [GO:0035335];positive regulation of protein localization to plasma membrane [GO:1903078];protein dephosphorylation [GO:0006470]	cytoplasm [GO:0005737];neuron projection terminus [GO:0044306];nucleoplasm [GO:0005654]	non-membrane spanning protein tyrosine phosphatase activity [GO:0004726];protein tyrosine phosphatase activity [GO:0004725]	GO:0004725;GO:0004726;GO:0005654;GO:0005737;GO:0006470;GO:0010977;GO:0035335;GO:0044306;GO:0071345;GO:1903078
EML3	Q32P44	Echinoderm microtubule-associated protein-like 3	12	17.4	95.196	160.23	3.25741	0.637529	25.1554	25.2476	25.1331	24.9912	24.8121	24.5819	24.4067	24.3012	24.4689	24.5082	23.8521	24.4624	24.4458	microtubule cytoskeleton organization [GO:0000226]	cytoplasm [GO:0005737];microtubule [GO:0005874]	microtubule binding [GO:0008017]	GO:0000226;GO:0005737;GO:0005874;GO:0008017
CIRBP	Q14011	Cold-inducible RNA-binding protein	4	33.1	18.648	323.31	3.16727	0.637135	26.64	26.6962	26.4804	26.4611	26.141	26.9117	26.3087	25.7245	25.8235	26.0773	25.9149	25.9654	25.6113	mRNA stabilization [GO:0048255];positive regulation of mRNA splicing, via spliceosome [GO:0048026];positive regulation of translation [GO:0045727];response to cold [GO:0009409];response to UV [GO:0009411];stress granule assembly [GO:0034063]	cytoplasm [GO:0005737];cytoplasmic stress granule [GO:0010494];nucleolus [GO:0005730];nucleoplasm [GO:0005654];nucleus [GO:0005634];ribonucleoprotein complex [GO:1990904];spliceosomal complex [GO:0005681]	mRNA 3'-UTR binding [GO:0003730];poly(U) RNA binding [GO:0008266];RNA binding [GO:0003723];small ribosomal subunit rRNA binding [GO:0070181];translation repressor activity [GO:0030371]	GO:0003723;GO:0003730;GO:0005634;GO:0005654;GO:0005681;GO:0005730;GO:0005737;GO:0008266;GO:0009409;GO:0009411;GO:0010494;GO:0030371;GO:0034063;GO:0045727;GO:0048026;GO:0048255;GO:0070181;GO:1990904
DFNA5	O60443	Non-syndromic hearing impairment protein 5	11	25.2	54.554	323.31	1.66627	0.635805	26.4854	26.474	26.2688	26.206	26.2296	26.4601	26.0064	25.3749	25.8005	25.5401	25.7528	24.8621	26.6905	cell death [GO:0008219];cellular response to tumor necrosis factor [GO:0071356];cellular response to virus [GO:0098586];inner ear receptor cell differentiation [GO:0060113];necrotic cell death [GO:0070265];negative regulation of cell population proliferation [GO:0008285];positive regulation of intrinsic apoptotic signaling pathway [GO:2001244];positive regulation of MAPK cascade [GO:0043410];pyro…	cytosol [GO:0005829];membrane [GO:0016020];plasma membrane [GO:0005886]	cardiolipin binding [GO:1901612];phosphatidylinositol-4,5-bisphosphate binding [GO:0005546]	GO:0005546;GO:0005829;GO:0005886;GO:0007605;GO:0008219;GO:0008285;GO:0016020;GO:0043410;GO:0060113;GO:0070265;GO:0070269;GO:0071356;GO:0098586;GO:1901612;GO:2001244
ARHGEF7	Q14155	Rho guanine nucleotide exchange factor 7	9	13	90.011	105.37	2.82968	0.634886	24.1105	24.2951	24.2466	23.7814	23.7451	23.9624	23.5961	23.5286	23.3534	23.17	22.8339	23.5337	23.7046	ephrin receptor signaling pathway [GO:0048013];focal adhesion assembly [GO:0048041];Golgi organization [GO:0007030];G protein-coupled receptor signaling pathway [GO:0007186];intracellular signal transduction [GO:0035556];lamellipodium assembly [GO:0030032];negative regulation of epidermal growth factor receptor signaling pathway [GO:0042059];nervous system development [GO:0007399];positive regula…	cell cortex [GO:0005938];cytosol [GO:0005829];focal adhesion [GO:0005925];lamellipodium [GO:0030027];neuronal cell body [GO:0043025];neuron projection [GO:0043005];protein-containing complex [GO:0032991];ruffle [GO:0001726]	guanyl-nucleotide exchange factor activity [GO:0005085];protein kinase binding [GO:0019901];Rho guanyl-nucleotide exchange factor activity [GO:0005089]	GO:0001726;GO:0005085;GO:0005089;GO:0005829;GO:0005925;GO:0005938;GO:0007030;GO:0007165;GO:0007186;GO:0007399;GO:0010763;GO:0019901;GO:0030027;GO:0030032;GO:0032991;GO:0035023;GO:0035556;GO:0042059;GO:0043005;GO:0043025;GO:0043065;GO:0043547;GO:0048013;GO:0048041;GO:0051056;GO:1900026;GO:1904424;GO:2000394
PTRF	Q6NZI2	Polymerase I and transcript release factor	23	71	43.476	323.31	2.72184	0.634488	30.8993	30.8081	30.6249	31.3647	31.2895	30.9779	30.3556	30.4706	30.385	30.5831	29.7839	30.3166	30.6221	positive regulation of cell motility [GO:2000147];protein secretion [GO:0009306];rRNA transcription [GO:0009303];termination of RNA polymerase I transcription [GO:0006363];transcription initiation from RNA polymerase I promoter [GO:0006361]	caveola [GO:0005901];cytoplasm [GO:0005737];cytosol [GO:0005829];endoplasmic reticulum [GO:0005783];intracellular membrane-bounded organelle [GO:0043231];membrane raft [GO:0045121];mitochondrion [GO:0005739];nucleoplasm [GO:0005654];nucleus [GO:0005634];plasma membrane [GO:0005886];protein-containing complex [GO:0032991]	identical protein binding [GO:0042802];RNA binding [GO:0003723];rRNA primary transcript binding [GO:0042134]	GO:0003723;GO:0005634;GO:0005654;GO:0005737;GO:0005739;GO:0005783;GO:0005829;GO:0005886;GO:0005901;GO:0006361;GO:0006363;GO:0009303;GO:0009306;GO:0032991;GO:0042134;GO:0042802;GO:0043231;GO:0045121;GO:2000147
CYB5R1	Q9UHQ9	NADH-cytochrome b5 reductase 1	6	20.7	34.094	10.24	4.10442	0.634479	27.0014	26.8561	26.9183	27.1374	27.1649	26.9529	26.4443	26.1119	26.724	26.4146	26.0493	26.3942	26.4567	bicarbonate transport [GO:0015701];platelet degranulation [GO:0002576];sterol biosynthetic process [GO:0016126]	endoplasmic reticulum membrane [GO:0005789];extracellular exosome [GO:0070062];integral component of membrane [GO:0016021];membrane [GO:0016020];mitochondrion [GO:0005739];plasma membrane [GO:0005886];platelet alpha granule membrane [GO:0031092]	cytochrome-b5 reductase activity, acting on NAD(P)H [GO:0004128];FAD binding [GO:0071949]	GO:0002576;GO:0004128;GO:0005739;GO:0005789;GO:0005886;GO:0015701;GO:0016020;GO:0016021;GO:0016126;GO:0031092;GO:0070062;GO:0071949
EHBP1	Q8NDI1	EH domain-binding protein 1	26	29.1	140.02	323.31	2.17904	0.634082	25.8628	25.6741	25.7887	25.9407	25.7144	25.8795	25.0678	24.2826	25.4994	25.4619	25.1712	25.6529	25.0958	endocytosis [GO:0006897];protein transport [GO:0015031]	cytosol [GO:0005829];endosome [GO:0005768];plasma membrane [GO:0005886]		GO:0005768;GO:0005829;GO:0005886;GO:0006897;GO:0015031
SPG21	Q9NZD8	Maspardin	4	13	34.96	19.235	1.89793	0.633253	25.4178	24.6512	24.916	24.6936	24.6224	24.7145	23.2626	24.2289	24.3079	24.4545	24.2332	24.6285	24.3031	antigen receptor-mediated signaling pathway [GO:0050851]	cytosol [GO:0005829];endosome membrane [GO:0010008];Golgi apparatus [GO:0005794];intracellular membrane-bounded organelle [GO:0043231];trans-Golgi network transport vesicle [GO:0030140]	CD4 receptor binding [GO:0042609]	GO:0005794;GO:0005829;GO:0010008;GO:0030140;GO:0042609;GO:0043231;GO:0050851
IGF2R	P11717	Cation-independent mannose-6-phosphate receptor	26	12.2	274.37	118.98	3.50746	0.632438	26.2464	26.4659	26.5628	26.0148	25.8405	25.9114	25.4611	25.5146	25.5275	25.445	25.4643	25.7881	25.5877	animal organ regeneration [GO:0031100];G protein-coupled receptor signaling pathway [GO:0007186];liver development [GO:0001889];lysosomal transport [GO:0007041];membrane organization [GO:0061024];neutrophil degranulation [GO:0043312];positive regulation by host of viral process [GO:0044794];positive regulation of apoptotic process [GO:0043065];post-embryonic development [GO:0009791];receptor-medi…	cell surface [GO:0009986];clathrin coat [GO:0030118];clathrin-coated vesicle membrane [GO:0030665];early endosome [GO:0005769];endocytic vesicle [GO:0030139];endosome [GO:0005768];extracellular exosome [GO:0070062];focal adhesion [GO:0005925];Golgi apparatus [GO:0005794];integral component of plasma membrane [GO:0005887];late endosome [GO:0005770];lysosomal membrane [GO:0005765];membrane [GO:0016…	enzyme binding [GO:0019899];G-protein alpha-subunit binding [GO:0001965];identical protein binding [GO:0042802];insulin-like growth factor-activated receptor activity [GO:0005010];insulin-like growth factor binding [GO:0005520];insulin-like growth factor II binding [GO:0031995];mannose binding [GO:0005537];phosphoprotein binding [GO:0051219];retinoic acid binding [GO:0001972];signaling receptor a…	GO:0001889;GO:0001965;GO:0001972;GO:0005010;GO:0005520;GO:0005537;GO:0005641;GO:0005765;GO:0005768;GO:0005769;GO:0005770;GO:0005794;GO:0005802;GO:0005886;GO:0005887;GO:0005925;GO:0006898;GO:0007041;GO:0007165;GO:0007186;GO:0007283;GO:0009791;GO:0009986;GO:0016020;GO:0019899;GO:0030118;GO:0030133;GO:0030139;GO:0030140;GO:0030665;GO:0030667;GO:0031100;GO:0031995;GO:0032526;GO:0032588;GO:0038023;GO:…
FCHSD1	Q86WN1	F-BAR and double SH3 domains protein 1	6	12.2	76.941	68.402	2.31346	0.627401	23.346	23.1441	23.179	22.6841	22.4558	22.8288	21.8777	NaN	22.38	22.3191	22.1953	22.4635	22.6376	multi-organism membrane organization [GO:0044803];neuromuscular synaptic transmission [GO:0007274];positive regulation of actin filament polymerization [GO:0030838];regulation of actin filament polymerization [GO:0030833]	cell projection [GO:0042995];cuticular plate [GO:0032437];neuromuscular junction [GO:0031594];perikaryon [GO:0043204];recycling endosome [GO:0055037]	lipid binding [GO:0008289]	GO:0007274;GO:0008289;GO:0030833;GO:0030838;GO:0031594;GO:0032437;GO:0042995;GO:0043204;GO:0044803;GO:0055037
SNX2	O60749	Sorting nexin-2	16	32.8	58.47	323.31	3.07602	0.624225	28.2815	27.9925	28.3158	28.1618	27.899	27.8646	27.4985	27.1365	27.7741	27.4107	27.3971	27.8719	27.1428	early endosome to Golgi transport [GO:0034498];endocytosis [GO:0006897];intracellular protein transport [GO:0006886];lamellipodium morphogenesis [GO:0072673];protein complex oligomerization [GO:0051259];retrograde transport, endosome to Golgi [GO:0042147]	cytoplasm [GO:0005737];cytosol [GO:0005829];early endosome membrane [GO:0031901];endosome [GO:0005768];endosome membrane [GO:0010008];lamellipodium [GO:0030027];lysosome [GO:0005764];membrane [GO:0016020];protein-containing complex [GO:0032991];retromer, tubulation complex [GO:0030905];retromer complex [GO:0030904]	cadherin binding [GO:0045296];epidermal growth factor receptor binding [GO:0005154];insulin receptor binding [GO:0005158];leptin receptor binding [GO:1990460];phosphatidylinositol binding [GO:0035091];protein heterodimerization activity [GO:0046982];protein homodimerization activity [GO:0042803];transferrin receptor binding [GO:1990459]	GO:0005154;GO:0005158;GO:0005737;GO:0005764;GO:0005768;GO:0005829;GO:0006886;GO:0006897;GO:0010008;GO:0016020;GO:0030027;GO:0030904;GO:0030905;GO:0031901;GO:0032991;GO:0034498;GO:0035091;GO:0042147;GO:0042803;GO:0045296;GO:0046982;GO:0051259;GO:0072673;GO:1990459;GO:1990460
SIRPA;SIRPB1	P78324;Q5TFQ8	Tyrosine-protein phosphatase non-receptor type substrate 1;Signal-regulatory protein beta-1 isoform 3	7	19.2	54.966	23.87	2.87481	0.623779	24.816	24.8723	25.2483	25.0049	24.7565	24.5926	24.6598	24.0968	24.2089	23.8412	24.5665	24.3666	24.0664	cell adhesion [GO:0007155];cell migration [GO:0016477];cellular response to hydrogen peroxide [GO:0070301];cellular response to interferon-gamma [GO:0071346];cellular response to interleukin-1 [GO:0071347];cellular response to interleukin-12 [GO:0071349];cellular response to lipopolysaccharide [GO:0071222];leukocyte migration [GO:0050900];monocyte extravasation [GO:0035696];negative regulation of…	cell surface [GO:0009986];extracellular exosome [GO:0070062];ficolin-1-rich granule membrane [GO:0101003];integral component of plasma membrane [GO:0005887];membrane [GO:0016020];plasma membrane [GO:0005886];tertiary granule membrane [GO:0070821];integral component of membrane [GO:0016021]	cell-cell adhesion mediator activity [GO:0098632];GTPase regulator activity [GO:0030695];protein antigen binding [GO:1990405];protein binding involved in heterotypic cell-cell adhesion [GO:0086080];protein phosphatase binding [GO:0019903];protein tyrosine kinase binding [GO:1990782];SH3 domain binding [GO:0017124]	GO:0001933;GO:0005886;GO:0005887;GO:0007155;GO:0009986;GO:0010468;GO:0016020;GO:0016477;GO:0017124;GO:0019903;GO:0022409;GO:0030695;GO:0032649;GO:0032651;GO:0032675;GO:0032680;GO:0032688;GO:0032715;GO:0032720;GO:0035696;GO:0043312;GO:0045019;GO:0045428;GO:0046329;GO:0050728;GO:0050765;GO:0050766;GO:0050870;GO:0050900;GO:0070062;GO:0070301;GO:0070373;GO:0070821;GO:0071222;GO:0071346;GO:0071347;GO:…
RAB9A	P51151	Ras-related protein Rab-9A	5	31.3	22.837	156.68	1.6495	0.623472	24.6163	24.864	25.1545	23.7835	24.2519	23.9895	23.3996	24.3935	23.941	23.6362	23.8508	23.8206	23.697	intracellular protein transport [GO:0006886];negative regulation by host of symbiont molecular function [GO:0052405];positive regulation of exocytosis [GO:0045921];Rab protein signal transduction [GO:0032482];regulation of protein localization [GO:0032880];retrograde transport, endosome to Golgi [GO:0042147]	cytosol [GO:0005829];endoplasmic reticulum membrane [GO:0005789];extracellular exosome [GO:0070062];late endosome [GO:0005770];lysosome [GO:0005764];melanosome [GO:0042470];phagocytic vesicle [GO:0045335];phagocytic vesicle membrane [GO:0030670];plasma membrane [GO:0005886];trans-Golgi network membrane [GO:0032588];transport vesicle [GO:0030133]	GDP binding [GO:0019003];GTPase activity [GO:0003924];GTP binding [GO:0005525];identical protein binding [GO:0042802]	GO:0003924;GO:0005525;GO:0005764;GO:0005770;GO:0005789;GO:0005829;GO:0005886;GO:0006886;GO:0019003;GO:0030133;GO:0030670;GO:0032482;GO:0032588;GO:0032880;GO:0042147;GO:0042470;GO:0042802;GO:0045335;GO:0045921;GO:0052405;GO:0070062
CAMLG	P49069	Calcium signal-modulating cyclophilin ligand	4	21.3	32.952	246.31	4.43066	0.623297	24.623	24.788	24.7847	24.5128	24.4389	24.5065	24.1978	23.8538	24.0139	24.0297	23.897	24.206	23.7016	defense response [GO:0006952];epidermal growth factor receptor signaling pathway [GO:0007173];negative regulation of proteasomal ubiquitin-dependent protein catabolic process [GO:0032435];negative regulation of protein ubiquitination [GO:0031397];protein stabilization [GO:0050821];receptor recycling [GO:0001881];signal transduction [GO:0007165];viral process [GO:0016032]	cytoplasm [GO:0005737];endoplasmic reticulum [GO:0005783];integral component of membrane [GO:0016021];membrane [GO:0016020]	cell adhesion molecule binding [GO:0050839];ubiquitin protein ligase binding [GO:0031625]	GO:0001881;GO:0005737;GO:0005783;GO:0006952;GO:0007165;GO:0007173;GO:0016020;GO:0016021;GO:0016032;GO:0031397;GO:0031625;GO:0032435;GO:0050821;GO:0050839
FLOT1	O75955	Flotillin-1	16	46.6	47.355	255.29	2.24367	0.619345	25.307	25.5777	25.1385	25.5142	25.5981	25.4672	24.7315	25.3269	24.7814	24.9224	24.0393	24.7422	25.1573	axonogenesis [GO:0007409];cellular response to exogenous dsRNA [GO:0071360];dsRNA transport [GO:0033227];extracellular matrix disassembly [GO:0022617];membrane raft assembly [GO:0001765];plasma membrane raft assembly [GO:0044854];positive regulation of cell adhesion molecule production [GO:0060355];positive regulation of cell-cell adhesion mediated by cadherin [GO:2000049];positive regulation of …	basolateral plasma membrane [GO:0016323];caveola [GO:0005901];cell-cell adherens junction [GO:0005913];cell-cell contact zone [GO:0044291];cell-cell junction [GO:0005911];centriolar satellite [GO:0034451];cytoplasmic vesicle [GO:0031410];dopaminergic synapse [GO:0098691];early endosome [GO:0005769];endosome [GO:0005768];external side of plasma membrane [GO:0009897];extracellular exosome [GO:00700…	ionotropic glutamate receptor binding [GO:0035255];protease binding [GO:0002020];protein heterodimerization activity [GO:0046982]	GO:0001765;GO:0001819;GO:0001931;GO:0001934;GO:0002020;GO:0002090;GO:0005765;GO:0005768;GO:0005769;GO:0005815;GO:0005886;GO:0005901;GO:0005911;GO:0005913;GO:0005925;GO:0007409;GO:0009897;GO:0016020;GO:0016323;GO:0016600;GO:0022617;GO:0030027;GO:0031410;GO:0032092;GO:0032226;GO:0032728;GO:0033227;GO:0034116;GO:0034141;GO:0034451;GO:0034976;GO:0035023;GO:0035255;GO:0042383;GO:0042470;GO:0044291;GO:…
FAM49B	Q9NUQ9	Protein FAM49B	4	18.8	36.748	83.097	2.18876	0.618398	24.6047	24.7243	25.0576	25.1312	24.6204	24.2214	23.5427	24.2042	24.3096	24.09	24.5391	23.8235	24.2484	platelet degranulation [GO:0002576];positive regulation of interferon-gamma production [GO:0032729];positive regulation of memory T cell activation [GO:2000568];positive regulation of T cell activation [GO:0050870];positive regulation of T cell mediated cytotoxicity [GO:0001916]	cilium [GO:0005929];extracellular exosome [GO:0070062];extracellular region [GO:0005576];membrane [GO:0016020];platelet alpha granule lumen [GO:0031093]	MHC class Ib protein binding, via antigen binding groove [GO:0023030]	GO:0001916;GO:0002576;GO:0005576;GO:0005929;GO:0016020;GO:0023030;GO:0031093;GO:0032729;GO:0050870;GO:0070062;GO:2000568
HACD3	Q9P035	Very-long-chain (3R)-3-hydroxyacyl-CoA dehydratase 3	6	23.5	43.159	159.53	2.27908	0.616259	27.3016	26.6555	27.2947	27.4562	26.9463	27.083	26.7345	25.9077	26.6761	26.4192	26.9884	26.4302	26.3904	activation of JUN kinase activity [GO:0007257];fatty acid elongation [GO:0030497];I-kappaB kinase/NF-kappaB signaling [GO:0007249];positive regulation by virus of viral protein levels in host cell [GO:0046726];positive regulation of viral genome replication [GO:0045070];Rac protein signal transduction [GO:0016601];Rho protein signal transduction [GO:0007266];small GTPase mediated signal transduct…	cytosol [GO:0005829];endoplasmic reticulum [GO:0005783];endoplasmic reticulum membrane [GO:0005789];focal adhesion [GO:0005925];integral component of membrane [GO:0016021];mitochondrion [GO:0005739];nuclear membrane [GO:0031965]	3-hydroxyacyl-CoA dehydratase activity [GO:0018812];3-hydroxy-arachidoyl-CoA dehydratase activity [GO:0102343];3-hydroxy-behenoyl-CoA dehydratase activity [GO:0102344];3-hydroxy-lignoceroyl-CoA dehydratase activity [GO:0102345];enzyme binding [GO:0019899];GTPase activator activity [GO:0005096];very-long-chain 3-hydroxyacyl-CoA dehydratase activity [GO:0102158]	GO:0005096;GO:0005739;GO:0005783;GO:0005789;GO:0005829;GO:0005925;GO:0007249;GO:0007257;GO:0007264;GO:0007266;GO:0016021;GO:0016601;GO:0018812;GO:0019899;GO:0030148;GO:0030497;GO:0031965;GO:0042761;GO:0045070;GO:0046726;GO:0102158;GO:0102343;GO:0102344;GO:0102345
TUBA4A	P68366	Tubulin alpha-4A chain	22	60.7	49.924	64.559	1.51753	0.613725	25.7007	25.6208	25.6634	26.458	25.3327	25.6626	24.2119	25.0699	25.1619	25.1308	25.9007	25.2689	25.1378	ciliary basal body-plasma membrane docking [GO:0097711];G2/M transition of mitotic cell cycle [GO:0000086];microtubule-based process [GO:0007017];microtubule cytoskeleton organization [GO:0000226];mitotic cell cycle [GO:0000278];platelet degranulation [GO:0002576];regulation of G2/M transition of mitotic cell cycle [GO:0010389]	cytoplasm [GO:0005737];cytoskeleton [GO:0005856];cytosol [GO:0005829];extracellular exosome [GO:0070062];extracellular region [GO:0005576];microtubule [GO:0005874];microtubule cytoskeleton [GO:0015630]	GTPase activity [GO:0003924];GTP binding [GO:0005525];protein kinase binding [GO:0019901];structural constituent of cytoskeleton [GO:0005200]	GO:0000086;GO:0000226;GO:0000278;GO:0002576;GO:0003924;GO:0005200;GO:0005525;GO:0005576;GO:0005737;GO:0005829;GO:0005856;GO:0005874;GO:0007017;GO:0010389;GO:0015630;GO:0019901;GO:0070062;GO:0097711
ACADVL	P49748	Very long-chain specific acyl-CoA dehydrogenase, mitochondrial	24	43.8	70.389	323.31	3.26227	0.608646	28.2954	28.1744	28.364	28.4616	28.0958	28.055	27.9043	27.7415	27.5406	27.6753	27.1373	27.5036	27.9238	energy derivation by oxidation of organic compounds [GO:0015980];epithelial cell differentiation [GO:0030855];fatty acid beta-oxidation [GO:0006635];fatty acid beta-oxidation using acyl-CoA dehydrogenase [GO:0033539];IRE1-mediated unfolded protein response [GO:0036498];negative regulation of fatty acid biosynthetic process [GO:0045717];negative regulation of fatty acid oxidation [GO:0046322];regu…	cytosol [GO:0005829];mitochondrial inner membrane [GO:0005743];mitochondrial matrix [GO:0005759];mitochondrial membrane [GO:0031966];mitochondrial nucleoid [GO:0042645];mitochondrion [GO:0005739];nucleolus [GO:0005730];nucleus [GO:0005634]	fatty-acyl-CoA binding [GO:0000062];flavin adenine dinucleotide binding [GO:0050660];long-chain-acyl-CoA dehydrogenase activity [GO:0004466];very-long-chain-acyl-CoA dehydrogenase activity [GO:0017099]	GO:0000062;GO:0001659;GO:0004466;GO:0005634;GO:0005730;GO:0005739;GO:0005743;GO:0005759;GO:0005829;GO:0006635;GO:0009409;GO:0015980;GO:0017099;GO:0030855;GO:0031966;GO:0033539;GO:0036498;GO:0042645;GO:0045717;GO:0046322;GO:0050660;GO:0090181
TPD52L2	O43399	Tumor protein D54	13	57.8	22.237	323.31	3.69854	0.60581	28.317	28.6037	28.6567	28.7815	28.4295	28.3926	27.876	27.7145	27.9371	27.6917	27.8627	28.073	28.3156	regulation of cell population proliferation [GO:0042127]	cytoplasm [GO:0005737];perinuclear region of cytoplasm [GO:0048471]	catalytic activity [GO:0003824];protein heterodimerization activity [GO:0046982];protein homodimerization activity [GO:0042803];RNA binding [GO:0003723]	GO:0003723;GO:0003824;GO:0005737;GO:0042127;GO:0042803;GO:0046982;GO:0048471
SNX18	Q96RF0	Sorting nexin-18	11	19.1	68.894	90.447	2.3503	0.603837	26.6037	26.6299	26.9425	26.3227	26.0704	25.9978	26.0566	25.7168	25.8376	25.7325	26.1383	25.8912	25.3951	cleavage furrow formation [GO:0036089];endocytosis [GO:0006897];endosomal transport [GO:0016197];mitotic cytokinesis [GO:0000281];positive regulation of GTPase activity [GO:0043547];protein transport [GO:0015031]	cytoplasmic vesicle [GO:0031410];cytoplasmic vesicle membrane [GO:0030659];endosome membrane [GO:0010008];extracellular exosome [GO:0070062];extrinsic component of cytoplasmic side of plasma membrane [GO:0031234]	phosphatidylinositol-4,5-bisphosphate binding [GO:0005546]	GO:0000281;GO:0005546;GO:0006897;GO:0010008;GO:0015031;GO:0016197;GO:0030659;GO:0031234;GO:0031410;GO:0036089;GO:0043547;GO:0070062
ATP6AP1	Q15904	V-type proton ATPase subunit S1	7	16.8	52.025	70.251	1.55771	0.600551	25.0511	24.757	25.2915	25.7825	24.5529	24.2802	24.4238	24.056	24.434	24.6535	24.485	24.5793	23.8322	cellular iron ion homeostasis [GO:0006879];cellular response to increased oxygen levels [GO:0036295];establishment of organelle localization [GO:0051656];insulin receptor signaling pathway [GO:0008286];ion transmembrane transport [GO:0034220];pH reduction [GO:0045851];positive regulation of bone resorption [GO:0045780];positive regulation of ERK1 and ERK2 cascade [GO:0070374];positive regulation …	endoplasmic reticulum-Golgi intermediate compartment membrane [GO:0033116];endoplasmic reticulum membrane [GO:0005789];endosome membrane [GO:0010008];extracellular exosome [GO:0070062];integral component of membrane [GO:0016021];plasma membrane proton-transporting V-type ATPase complex [GO:0033181];proton-transporting two-sector ATPase complex [GO:0016469];proton-transporting V-type ATPase, V1 do…	ATP binding [GO:0005524];proton-transporting ATPase activity, rotational mechanism [GO:0046961];proton-transporting ATP synthase activity, rotational mechanism [GO:0046933];Rab GTPase binding [GO:0017137];transporter activity [GO:0005215]	GO:0005215;GO:0005524;GO:0005789;GO:0006879;GO:0008286;GO:0010008;GO:0016021;GO:0016469;GO:0017137;GO:0030641;GO:0033116;GO:0033180;GO:0033181;GO:0033572;GO:0034220;GO:0036295;GO:0045669;GO:0045780;GO:0045851;GO:0045921;GO:0046933;GO:0046961;GO:0051656;GO:0070062;GO:0070374;GO:1902600;GO:2001206
HMGA1	P17096	High mobility group protein HMG-I/HMG-Y	7	54.2	11.676	145.38	1.34939	0.600299	26.2994	26.6218	26.2328	26.8123	26.5946	25.7271	26.0287	25.9434	25.9848	25.4936	25.2948	25.0578	26.6642	base-excision repair [GO:0006284];DNA unwinding involved in DNA replication [GO:0006268];establishment of integrated proviral latency [GO:0075713];negative regulation of cell population proliferation [GO:0008285];negative regulation of chromatin silencing [GO:0031936];negative regulation of transcription, DNA-templated [GO:0045892];nuclear transport [GO:0051169];nucleosome disassembly [GO:0006337…	cytosol [GO:0005829];focal adhesion [GO:0005925];nucleoplasm [GO:0005654];nucleus [GO:0005634];RNA polymerase II transcription factor complex [GO:0090575];senescence-associated heterochromatin focus [GO:0035985];transcription factor complex [GO:0005667]	5'-deoxyribose-5-phosphate lyase activity [GO:0051575];AT DNA binding [GO:0003680];chromatin binding [GO:0003682];DNA-(apurinic or apyrimidinic site) endonuclease activity [GO:0003906];DNA binding [GO:0003677];DNA-binding transcription factor activity, RNA polymerase II-specific [GO:0000981];enhancer sequence-specific DNA binding [GO:0001158];enzyme binding [GO:0019899];nuclear receptor transcrip…	GO:0000981;GO:0001158;GO:0003677;GO:0003680;GO:0003682;GO:0003713;GO:0003906;GO:0005634;GO:0005654;GO:0005667;GO:0005829;GO:0005925;GO:0006268;GO:0006284;GO:0006337;GO:0006355;GO:0008134;GO:0008285;GO:0009615;GO:0019899;GO:0030374;GO:0030527;GO:0031936;GO:0035985;GO:0035986;GO:0042974;GO:0042975;GO:0045892;GO:0045893;GO:0045944;GO:0046965;GO:0051169;GO:0051575;GO:0065003;GO:0075713;GO:0090402;GO:…
LIPA	P38571	Lysosomal acid lipase/cholesteryl ester hydrolase	3	5.8	45.418	5.7308	1.33619	0.598614	25.4367	24.9986	25.9861	NaN	25.4763	25.163	24.8482	24.6789	NaN	24.3006	NaN	24.7653	25.4747	cell morphogenesis [GO:0000902];cell population proliferation [GO:0008283];cellular lipid metabolic process [GO:0044255];cytokine production [GO:0001816];homeostasis of number of cells within a tissue [GO:0048873];inflammatory response [GO:0006954];lipid catabolic process [GO:0016042];low-density lipoprotein particle clearance [GO:0034383];lung development [GO:0030324];sterol metabolic process [G…	fibrillar center [GO:0001650];intracellular membrane-bounded organelle [GO:0043231];lysosomal lumen [GO:0043202];lysosome [GO:0005764]	lipase activity [GO:0016298];sterol esterase activity [GO:0004771]	GO:0000902;GO:0001650;GO:0001816;GO:0004771;GO:0005764;GO:0006954;GO:0008283;GO:0016042;GO:0016125;GO:0016298;GO:0030324;GO:0034383;GO:0043202;GO:0043231;GO:0044255;GO:0048771;GO:0048873
MTR	Q99707	Methionine synthase	13	11.9	140.53	14.086	3.88755	0.592805	24.2293	23.969	24.1813	24.1726	23.9875	24.0521	23.6403	23.2687	23.5673	23.3457	23.8405	23.655	23.2232	axon regeneration [GO:0031103];cellular response to nitric oxide [GO:0071732];cobalamin metabolic process [GO:0009235];methionine biosynthetic process [GO:0009086];methylation [GO:0032259];nervous system development [GO:0007399];pteridine-containing compound metabolic process [GO:0042558];response to axon injury [GO:0048678];sulfur amino acid metabolic process [GO:0000096]	cytosol [GO:0005829]	cobalamin binding [GO:0031419];methionine synthase activity [GO:0008705];zinc ion binding [GO:0008270]	GO:0000096;GO:0005829;GO:0007399;GO:0008270;GO:0008705;GO:0009086;GO:0009235;GO:0031103;GO:0031419;GO:0032259;GO:0042558;GO:0048678;GO:0071732
AIFM2	Q9BRQ8	Apoptosis-inducing factor 2	6	14.7	40.526	13.967	1.44953	0.591121	23.5681	23.7233	24.1045	23.4135	23.7001	23.7553	22.7017	NaN	23.3254	NaN	22.703	23.7486	NaN	apoptotic mitochondrial changes [GO:0008637];positive regulation of apoptotic process [GO:0043065];regulation of apoptotic process [GO:0042981]	cytoplasm [GO:0005737];cytosol [GO:0005829];extracellular space [GO:0005615];integral component of membrane [GO:0016021];lipid droplet [GO:0005811];mitochondrial outer membrane [GO:0005741];mitochondrion [GO:0005739]	DNA binding [GO:0003677];electron-transferring-flavoprotein dehydrogenase activity [GO:0004174];flavin adenine dinucleotide binding [GO:0050660]	GO:0003677;GO:0004174;GO:0005615;GO:0005737;GO:0005739;GO:0005741;GO:0005811;GO:0005829;GO:0008637;GO:0016021;GO:0042981;GO:0043065;GO:0050660
MBLAC2	Q68D91	Metallo-beta-lactamase domain-containing protein 2	3	17.6	31.371	22.074	2.97862	0.590678	23.5465	23.262	22.9511	23.2284	23.6871	23.2063	22.8434	22.8692	22.4583	22.5823	23.082	22.5327	22.6923		extracellular exosome [GO:0070062]	hydrolase activity [GO:0016787];metal ion binding [GO:0046872]	GO:0016787;GO:0046872;GO:0070062
GPD2	P43304	Glycerol-3-phosphate dehydrogenase, mitochondrial	13	22.1	80.852	163.5	2.1748	0.590659	25.4264	25.6196	25.5916	26.5777	26.1045	26.0815	25.4185	25.2328	25.1593	25.2989	25.0501	25.5304	25.4769	camera-type eye development [GO:0043010];gluconeogenesis [GO:0006094];glycerol-3-phosphate catabolic process [GO:0046168];glycerol catabolic process [GO:0019563];glycerophosphate shuttle [GO:0006127];multicellular organism growth [GO:0035264]	glycerol-3-phosphate dehydrogenase complex [GO:0009331];mitochondrial inner membrane [GO:0005743];mitochondrion [GO:0005739]	calcium ion binding [GO:0005509];glycerol-3-phosphate dehydrogenase (quinone) activity [GO:0004368];glycerol-3-phosphate dehydrogenase [NAD+] activity [GO:0004367];sn-glycerol-3-phosphate:ubiquinone-8 oxidoreductase activity [GO:0052591]	GO:0004367;GO:0004368;GO:0005509;GO:0005739;GO:0005743;GO:0006094;GO:0006127;GO:0009331;GO:0019563;GO:0035264;GO:0043010;GO:0046168;GO:0052591
CLCN7	P51798	H(+)/Cl(-) exchange transporter 7	9	15.9	88.678	115.56	2.96706	0.586665	23.9901	24.0172	24.1382	23.6689	23.5129	23.576	23.2881	23.1549	23.2407	23.6661	23.0261	23.2264	23.0116	ion transmembrane transport [GO:0034220];response to pH [GO:0009268]	cytoplasmic vesicle [GO:0031410];integral component of membrane [GO:0016021];intracellular membrane-bounded organelle [GO:0043231];lysosomal membrane [GO:0005765];membrane [GO:0016020];nucleoplasm [GO:0005654]	antiporter activity [GO:0015297];ATP binding [GO:0005524];chloride channel activity [GO:0005254];chloride transmembrane transporter activity [GO:0015108];transmembrane transporter activity [GO:0022857];voltage-gated chloride channel activity [GO:0005247]	GO:0005247;GO:0005254;GO:0005524;GO:0005654;GO:0005765;GO:0009268;GO:0015108;GO:0015297;GO:0016020;GO:0016021;GO:0022857;GO:0031410;GO:0034220;GO:0043231
DPYSL3	Q14195	Dihydropyrimidinase-related protein 3	21	56	61.963	323.31	1.83974	0.586302	28.9033	29.0101	28.8905	29.7948	29.8777	29.6394	28.2664	28.8214	28.9535	28.8354	28.7196	29.0329	28.7351	actin crosslink formation [GO:0051764];actin filament bundle assembly [GO:0051017];cellular response to cytokine stimulus [GO:0071345];negative regulation of cell migration [GO:0030336];negative regulation of neuron projection development [GO:0010977];neuron development [GO:0048666];positive regulation of filopodium assembly [GO:0051491];positive regulation of neuron projection development [GO:00…	cell body [GO:0044297];cytosol [GO:0005829];exocytic vesicle [GO:0070382];extracellular space [GO:0005615];filamentous actin [GO:0031941];growth cone [GO:0030426];lamellipodium [GO:0030027];synapse [GO:0045202]	chondroitin sulfate binding [GO:0035374];filamin binding [GO:0031005];hydrolase activity, acting on carbon-nitrogen (but not peptide) bonds [GO:0016810];SH3 domain binding [GO:0017124]	GO:0005615;GO:0005829;GO:0010976;GO:0010977;GO:0016810;GO:0017124;GO:0030027;GO:0030336;GO:0030426;GO:0031005;GO:0031941;GO:0035374;GO:0044297;GO:0045202;GO:0048666;GO:0048678;GO:0051017;GO:0051260;GO:0051491;GO:0051764;GO:0070382;GO:0071345
TIMMDC1	Q9NPL8	Complex I assembly factor TIMMDC1, mitochondrial	5	20.4	32.177	26.691	1.61588	0.585554	24.9058	24.4348	25.0483	24.479	25.0148	24.4523	NaN	24.294	24.5648	NaN	NaN	23.7074	23.9817	mitochondrial respiratory chain complex I assembly [GO:0032981]	integral component of membrane [GO:0016021];mitochondrial inner membrane [GO:0005743];mitochondrion [GO:0005739];nucleoplasm [GO:0005654];nucleus [GO:0005634]		GO:0005634;GO:0005654;GO:0005739;GO:0005743;GO:0016021;GO:0032981
HSPA13	P48723	Heat shock 70 kDa protein 13	11	25.7	51.927	96.68	3.11321	0.584856	24.4655	24.8466	24.8555	24.699	24.8134	24.432	24.1063	24.192	24.4852	24.246	23.9534	24.0563	23.6642	cellular response to heat [GO:0034605];cellular response to unfolded protein [GO:0034620];chaperone cofactor-dependent protein refolding [GO:0051085];endoplasmic reticulum unfolded protein response [GO:0030968];protein refolding [GO:0042026];response to unfolded protein [GO:0006986];ubiquitin-dependent ERAD pathway [GO:0030433]	cytoplasm [GO:0005737];endoplasmic reticulum chaperone complex [GO:0034663];endoplasmic reticulum lumen [GO:0005788];extracellular exosome [GO:0070062];intracellular membrane-bounded organelle [GO:0043231];membrane [GO:0016020];nucleus [GO:0005634]	ATPase activity [GO:0016887];ATPase activity, coupled [GO:0042623];ATP binding [GO:0005524];heat shock protein binding [GO:0031072];misfolded protein binding [GO:0051787];protein folding chaperone [GO:0044183];unfolded protein binding [GO:0051082]	GO:0005524;GO:0005634;GO:0005737;GO:0005788;GO:0006986;GO:0016020;GO:0016887;GO:0030433;GO:0030968;GO:0031072;GO:0034605;GO:0034620;GO:0034663;GO:0042026;GO:0042623;GO:0043231;GO:0044183;GO:0051082;GO:0051085;GO:0051787;GO:0070062
NCSTN	Q92542	Nicastrin	8	10.6	78.41	323.31	3.07804	0.582113	26.8064	27.0296	26.7694	27.3108	26.7028	26.8758	26.6887	26.2866	26.4713	26.3176	26.0331	26.4781	26.0604	adult behavior [GO:0030534];amyloid-beta formation [GO:0034205];amyloid precursor protein biosynthetic process [GO:0042983];amyloid precursor protein catabolic process [GO:0042987];amyloid precursor protein metabolic process [GO:0042982];cellular protein metabolic process [GO:0044267];cellular response to calcium ion [GO:0071277];central nervous system myelination [GO:0022010];cerebellum developm…	azurophil granule membrane [GO:0035577];early endosome [GO:0005769];endoplasmic reticulum [GO:0005783];endosome membrane [GO:0010008];extracellular exosome [GO:0070062];focal adhesion [GO:0005925];gamma-secretase complex [GO:0070765];Golgi apparatus [GO:0005794];integral component of membrane [GO:0016021];integral component of plasma membrane [GO:0005887];integral component of presynaptic membran…	endopeptidase activity [GO:0004175]	GO:0002262;GO:0004175;GO:0005739;GO:0005765;GO:0005769;GO:0005783;GO:0005794;GO:0005886;GO:0005887;GO:0005925;GO:0006508;GO:0006509;GO:0007212;GO:0007215;GO:0007220;GO:0007611;GO:0008021;GO:0010008;GO:0016020;GO:0016021;GO:0016485;GO:0021549;GO:0022010;GO:0030534;GO:0031293;GO:0034205;GO:0035333;GO:0035577;GO:0042098;GO:0042383;GO:0042470;GO:0042982;GO:0042983;GO:0042986;GO:0042987;GO:0043065;GO:…
CD276	Q5ZPR3	CD276 antigen	9	36.1	57.235	323.31	4.18586	0.579879	26.6703	26.4515	26.3991	26.6652	26.487	26.7313	25.698	25.9682	25.9161	26.2076	26.0657	26.2107	25.8464	cell population proliferation [GO:0008283];immune response [GO:0006955];positive regulation of interferon-gamma biosynthetic process [GO:0045078];positive regulation of T cell proliferation [GO:0042102];regulation of immune response [GO:0050776];T cell activation [GO:0042110];T cell receptor signaling pathway [GO:0050852]	external side of plasma membrane [GO:0009897];integral component of membrane [GO:0016021]	signaling receptor binding [GO:0005102]	GO:0005102;GO:0006955;GO:0008283;GO:0009897;GO:0016021;GO:0042102;GO:0042110;GO:0045078;GO:0050776;GO:0050852
STRN3	Q13033	Striatin-3	11	21.8	87.208	148.45	3.86144	0.576097	26.2216	26.2414	26.2759	26.1734	25.8626	26.0399	25.837	25.2988	25.6365	25.7131	25.3076	25.588	25.5369	negative regulation of intracellular estrogen receptor signaling pathway [GO:0033147];negative regulation of transcription, DNA-templated [GO:0045892];negative regulation of transcription by RNA polymerase II [GO:0000122];positive regulation of transcription by RNA polymerase II [GO:0045944];response to estradiol [GO:0032355]	cytoplasm [GO:0005737];dendrite [GO:0030425];FAR/SIN/STRIPAK complex [GO:0090443];Golgi apparatus [GO:0005794];neuronal cell body [GO:0043025];nucleoplasm [GO:0005654];nucleus [GO:0005634];plasma membrane [GO:0005886];protein-containing complex [GO:0032991]	armadillo repeat domain binding [GO:0070016];calmodulin binding [GO:0005516];DNA-binding transcription factor activity [GO:0003700];protein-containing complex binding [GO:0044877];protein phosphatase 2A binding [GO:0051721];Rho GTPase binding [GO:0017048]	GO:0000122;GO:0003700;GO:0005516;GO:0005634;GO:0005654;GO:0005737;GO:0005794;GO:0005886;GO:0017048;GO:0030425;GO:0032355;GO:0032991;GO:0033147;GO:0043025;GO:0044877;GO:0045892;GO:0045944;GO:0051721;GO:0070016;GO:0090443
LPCAT1	Q8NF37	Lysophosphatidylcholine acyltransferase 1	5	9.4	59.151	295.34	3.27935	0.575039	24.8581	25.0588	25.0891	25.1929	25.3185	25.3763	24.2447	24.3701	24.7733	24.7186	24.4174	24.6247	24.8687	negative regulation of phosphatidylcholine biosynthetic process [GO:2001246];neutrophil degranulation [GO:0043312];phosphatidic acid biosynthetic process [GO:0006654];phosphatidylcholine acyl-chain remodeling [GO:0036151];phosphatidylcholine biosynthetic process [GO:0006656];phosphatidylglycerol acyl-chain remodeling [GO:0036148];phospholipid biosynthetic process [GO:0008654];positive regulation …	azurophil granule membrane [GO:0035577];endoplasmic reticulum [GO:0005783];endoplasmic reticulum membrane [GO:0005789];Golgi apparatus [GO:0005794];Golgi membrane [GO:0000139];integral component of membrane [GO:0016021];lipid droplet [GO:0005811];membrane [GO:0016020];plasma membrane [GO:0005886]	1-acylglycerophosphocholine O-acyltransferase activity [GO:0047184];1-alkenylglycerophosphocholine O-acyltransferase activity [GO:0047159];1-alkylglycerophosphocholine O-acetyltransferase activity [GO:0047192];1-alkylglycerophosphocholine O-acyltransferase activity [GO:0047191];calcium ion binding [GO:0005509]	GO:0000139;GO:0005509;GO:0005783;GO:0005789;GO:0005794;GO:0005811;GO:0005886;GO:0006654;GO:0006656;GO:0008654;GO:0016020;GO:0016021;GO:0035577;GO:0036148;GO:0036151;GO:0043129;GO:0043312;GO:0045732;GO:0047159;GO:0047184;GO:0047191;GO:0047192;GO:0060041;GO:2001246
PKD2	Q13563	Polycystin-2	9	10.5	109.69	41.6	1.36379	0.574941	24.5754	24.4079	25.2739	24.369	24.0324	24.0457	24.8031	23.8229	23.8842	23.3917	23.5407	23.8243	23.8635	aorta development [GO:0035904];branching involved in ureteric bud morphogenesis [GO:0001658];calcium ion transmembrane transport [GO:0070588];calcium ion transport [GO:0006816];cell-cell signaling by wnt [GO:0198738];cell cycle arrest [GO:0007050];cellular response to calcium ion [GO:0071277];cellular response to cAMP [GO:0071320];cellular response to fluid shear stress [GO:0071498];cellular resp…	basal cortex [GO:0045180];basal plasma membrane [GO:0009925];cation channel complex [GO:0034703];cell-cell junction [GO:0005911];ciliary basal body [GO:0036064];ciliary membrane [GO:0060170];cilium [GO:0005929];cytoplasm [GO:0005737];cytoplasmic vesicle membrane [GO:0030659];endoplasmic reticulum [GO:0005783];endoplasmic reticulum membrane [GO:0005789];extracellular exosome [GO:0070062];Golgi app…	actinin binding [GO:0042805];ATPase binding [GO:0051117];calcium channel activity [GO:0005262];calcium-induced calcium release activity [GO:0048763];calcium ion binding [GO:0005509];cation channel activity [GO:0005261];cytoskeletal protein binding [GO:0008092];HLH domain binding [GO:0043398];identical protein binding [GO:0042802];ion channel binding [GO:0044325];muscle alpha-actinin binding [GO:0…	GO:0001658;GO:0001889;GO:0001892;GO:0001947;GO:0002133;GO:0003127;GO:0005102;GO:0005244;GO:0005245;GO:0005248;GO:0005249;GO:0005261;GO:0005262;GO:0005267;GO:0005509;GO:0005737;GO:0005783;GO:0005789;GO:0005794;GO:0005886;GO:0005887;GO:0005911;GO:0005929;GO:0006816;GO:0007050;GO:0007259;GO:0007368;GO:0007507;GO:0008092;GO:0008285;GO:0009925;GO:0015271;GO:0016020;GO:0016055;GO:0021510;GO:0021915;GO:…
ANPEP	P15144	Aminopeptidase N	26	32.4	109.54	323.31	1.9819	0.574595	30.5765	30.6635	30.6228	31.2933	31.109	31.1678	30.1091	30.1326	30.8991	29.9664	30.0847	30.651	30.4733	angiogenesis [GO:0001525];cell differentiation [GO:0030154];neutrophil degranulation [GO:0043312];peptide catabolic process [GO:0043171];proteolysis [GO:0006508]	cytoplasm [GO:0005737];endoplasmic reticulum-Golgi intermediate compartment [GO:0005793];external side of plasma membrane [GO:0009897];extracellular exosome [GO:0070062];extracellular space [GO:0005615];integral component of membrane [GO:0016021];lysosomal membrane [GO:0005765];plasma membrane [GO:0005886];secretory granule membrane [GO:0030667]	aminopeptidase activity [GO:0004177];metalloaminopeptidase activity [GO:0070006];metallopeptidase activity [GO:0008237];peptide binding [GO:0042277];signaling receptor activity [GO:0038023];virus receptor activity [GO:0001618];zinc ion binding [GO:0008270]	GO:0001525;GO:0001618;GO:0004177;GO:0005615;GO:0005737;GO:0005765;GO:0005793;GO:0005886;GO:0006508;GO:0008237;GO:0008270;GO:0009897;GO:0016021;GO:0030154;GO:0030667;GO:0038023;GO:0042277;GO:0043171;GO:0043312;GO:0070006;GO:0070062
RAB34	Q9BZG1	Ras-related protein Rab-34	6	29.3	29.044	122.75	2.82487	0.57341	25.3942	24.5999	25.1667	25.5079	24.9782	25.2623	24.4185	24.7587	24.6302	24.7501	24.5454	24.5647	24.3793	antigen processing and presentation [GO:0019882];cell projection organization [GO:0030030];endocytosis [GO:0006897];Golgi to plasma membrane protein transport [GO:0043001];intracellular protein transport [GO:0006886];lysosome localization [GO:0032418];phagosome-lysosome fusion [GO:0090385];phagosome maturation [GO:0090382];positive regulation of smoothened signaling pathway [GO:0045880];protein l…	cilium [GO:0005929];extracellular exosome [GO:0070062];Golgi apparatus [GO:0005794];Golgi cisterna [GO:0031985];Golgi stack [GO:0005795];perinuclear region of cytoplasm [GO:0048471];phagocytic vesicle [GO:0045335];phagocytic vesicle membrane [GO:0030670];vesicle [GO:0031982]	GTPase activity [GO:0003924];GTP binding [GO:0005525];GTP-dependent protein binding [GO:0030742];Ral GTPase binding [GO:0017160]	GO:0003924;GO:0005525;GO:0005794;GO:0005795;GO:0005929;GO:0006886;GO:0006897;GO:0017160;GO:0019882;GO:0030030;GO:0030670;GO:0030742;GO:0031982;GO:0031985;GO:0032418;GO:0032482;GO:0043001;GO:0045335;GO:0045880;GO:0048471;GO:0070062;GO:0072659;GO:0090382;GO:0090385
ABR	Q12979	Active breakpoint cluster region-related protein	12	19.8	97.597	53.739	3.02713	0.571543	25.0187	25.071	25.1129	24.9487	25.1748	25.3145	24.1911	24.1908	24.4707	24.4786	24.9125	24.657	24.8457	actin cytoskeleton organization [GO:0030036];activation of GTPase activity [GO:0090630];brain development [GO:0007420];G protein-coupled receptor signaling pathway [GO:0007186];inner ear morphogenesis [GO:0042472];modulation of chemical synaptic transmission [GO:0050804];negative regulation of blood vessel remodeling [GO:0060313];negative regulation of cellular extravasation [GO:0002692];negative…	axon [GO:0030424];cell junction [GO:0030054];cytosol [GO:0005829];dendritic spine [GO:0043197];glutamatergic synapse [GO:0098978];membrane [GO:0016020];plasma membrane [GO:0005886];postsynaptic density, intracellular component [GO:0099092];Schaffer collateral - CA1 synapse [GO:0098685]	GTPase activator activity [GO:0005096];guanyl-nucleotide exchange factor activity [GO:0005085];Rho guanyl-nucleotide exchange factor activity [GO:0005089]	GO:0002692;GO:0005085;GO:0005089;GO:0005096;GO:0005829;GO:0005886;GO:0007186;GO:0007264;GO:0007420;GO:0016020;GO:0030036;GO:0030054;GO:0030424;GO:0032496;GO:0035023;GO:0042472;GO:0043065;GO:0043114;GO:0043197;GO:0043314;GO:0050728;GO:0050766;GO:0050804;GO:0050885;GO:0051056;GO:0060313;GO:0090630;GO:0098685;GO:0098978;GO:0099092
DHRS7B	Q6IAN0	Dehydrogenase/reductase SDR family member 7B	6	20.3	35.119	50.6	1.92123	0.56751	24.3065	23.6043	24.4803	24.89	24.2826	24.3395	23.9817	23.4648	NaN	23.7057	23.6706	23.8954	23.78	ether lipid biosynthetic process [GO:0008611];neutrophil differentiation [GO:0030223]	endoplasmic reticulum membrane [GO:0005789];integral component of membrane [GO:0016021];membrane [GO:0016020]	oxidoreductase activity [GO:0016491]	GO:0005789;GO:0008611;GO:0016020;GO:0016021;GO:0016491;GO:0030223
RAD23A	P54725	UV excision repair protein RAD23 homolog A	9	42.1	39.609	118.92	3.05183	0.567044	26.7351	26.8039	26.9686	27.0264	26.8854	26.8667	26.6007	25.9489	26.4745	26.1285	26.4074	26.6514	25.9863	nucleotide-excision repair [GO:0006289];positive regulation of cell cycle [GO:0045787];positive regulation of proteasomal ubiquitin-dependent protein catabolic process [GO:0032436];positive regulation of viral genome replication [GO:0045070];proteasome-mediated ubiquitin-dependent protein catabolic process [GO:0043161];protein destabilization [GO:0031648];protein deubiquitination [GO:0016579];reg…	cytoplasm [GO:0005737];cytosol [GO:0005829];intracellular membrane-bounded organelle [GO:0043231];microtubule organizing center [GO:0005815];nucleoplasm [GO:0005654];nucleus [GO:0005634];proteasome complex [GO:0000502];protein-containing complex [GO:0032991]	damaged DNA binding [GO:0003684];kinase binding [GO:0019900];polyubiquitin modification-dependent protein binding [GO:0031593];proteasome binding [GO:0070628];single-stranded DNA binding [GO:0003697];ubiquitin binding [GO:0043130];ubiquitin-specific protease binding [GO:1990381]	GO:0000502;GO:0003684;GO:0003697;GO:0005634;GO:0005654;GO:0005737;GO:0005815;GO:0005829;GO:0006289;GO:0016032;GO:0016579;GO:0019900;GO:0031593;GO:0031648;GO:0032434;GO:0032436;GO:0032991;GO:0043130;GO:0043161;GO:0043231;GO:0045070;GO:0045787;GO:0070628;GO:1990381
RAI14	Q9P0K7	Ankycorbin	31	37.6	110.04	323.31	3.40369	0.566285	25.3841	25.5167	25.6018	25.3596	25.3384	25.3547	24.6975	25.1674	24.8295	24.5436	24.6674	24.8833	25.2287	cell differentiation [GO:0030154];spermatogenesis [GO:0007283]	cell cortex [GO:0005938];cell junction [GO:0030054];cytoskeleton [GO:0005856];cytosol [GO:0005829];fibrillar center [GO:0001650];nucleus [GO:0005634]	actin binding [GO:0003779]	GO:0001650;GO:0003779;GO:0005634;GO:0005829;GO:0005856;GO:0005938;GO:0007283;GO:0030054;GO:0030154
KIFAP3	Q92845	Kinesin-associated protein 3	4	7.4	91.204	111.93	1.36623	0.56569	22.2816	22.0669	22.5037	23.0399	22.5371	22.9981	21.5814	NaN	22.1185	22.3584	NaN	NaN	21.9638	antigen processing and presentation of exogenous peptide antigen via MHC class II [GO:0019886];intraciliary transport involved in cilium assembly [GO:0035735];microtubule-based movement [GO:0007018];microtubule-based process [GO:0007017];negative regulation of apoptotic process [GO:0043066];negative regulation of cell population proliferation [GO:0008285];plus-end-directed vesicle transport along…	axoneme [GO:0005930];centrosome [GO:0005813];ciliary basal body [GO:0036064];ciliary tip [GO:0097542];cilium [GO:0005929];condensed nuclear chromosome [GO:0000794];cytosol [GO:0005829];endoplasmic reticulum [GO:0005783];Golgi apparatus [GO:0005794];kinesin II complex [GO:0016939];microtubule cytoskeleton [GO:0015630];periciliary membrane compartment [GO:1990075];photoreceptor connecting cilium [G…	intraciliary transport particle B binding [GO:0120170];kinesin binding [GO:0019894];protein phosphatase binding [GO:0019903]	GO:0000794;GO:0005783;GO:0005794;GO:0005813;GO:0005829;GO:0005929;GO:0005930;GO:0006890;GO:0007017;GO:0007018;GO:0007165;GO:0008285;GO:0015630;GO:0016939;GO:0019886;GO:0019894;GO:0019903;GO:0032391;GO:0035735;GO:0036064;GO:0043066;GO:0046587;GO:0065003;GO:0072383;GO:0097542;GO:0120170;GO:1990075
SLC30A1	Q9Y6M5	Zinc transporter 1	3	12.6	55.299	30.371	1.78905	0.565045	23.6393	23.1695	NaN	23.2327	23.6898	23.2772	22.7132	23.0888	23.416	NaN	22.3673	22.7363	22.6984	cadmium ion transmembrane transport [GO:0070574];calcium ion import [GO:0070509];cellular calcium ion homeostasis [GO:0006874];cellular zinc ion homeostasis [GO:0006882];detoxification of cadmium ion [GO:0071585];in utero embryonic development [GO:0001701];negative regulation of calcium ion import [GO:0090281];negative regulation of neurotransmitter secretion [GO:0046929];negative regulation of z…	cytoplasm [GO:0005737];endoplasmic reticulum [GO:0005783];Golgi apparatus [GO:0005794];integral component of postsynaptic density membrane [GO:0099061];nuclear membrane [GO:0031965];plasma membrane [GO:0005886];Schaffer collateral - CA1 synapse [GO:0098685];T-tubule [GO:0030315]	calcium channel inhibitor activity [GO:0019855];zinc ion transmembrane transporter activity [GO:0005385]	GO:0001701;GO:0005385;GO:0005737;GO:0005783;GO:0005794;GO:0005886;GO:0006829;GO:0006874;GO:0006882;GO:0019855;GO:0030315;GO:0031965;GO:0046929;GO:0070509;GO:0070574;GO:0071584;GO:0071585;GO:0090281;GO:0098685;GO:0099061
PGRMC2	O15173	Membrane-associated progesterone receptor component 2	8	30.5	23.818	173.61	2.05808	0.563845	29.0279	29.2764	29.1211	28.6613	28.4898	28.3757	27.9166	28.1096	28.7148	28.4305	28.023	28.3603	28.2759		integral component of membrane [GO:0016021];membrane [GO:0016020];nuclear envelope [GO:0005635]	steroid binding [GO:0005496];steroid hormone receptor activity [GO:0003707]	GO:0003707;GO:0005496;GO:0005635;GO:0016020;GO:0016021
LPIN1	Q14693	Phosphatidate phosphatase LPIN1	6	9.9	98.663	66.134	1.71597	0.563721	23.6857	24.1297	23.8425	24.4312	24.5713	24.5162	23.9634	23.1847	23.8778	23.7054	23.0406	23.7433	23.9113	animal organ regeneration [GO:0031100];cellular response to insulin stimulus [GO:0032869];fatty acid catabolic process [GO:0009062];mitotic nuclear envelope disassembly [GO:0007077];phosphatidylcholine biosynthetic process [GO:0006656];phosphatidylethanolamine biosynthetic process [GO:0006646];positive regulation of cold-induced thermogenesis [GO:0120162];positive regulation of transcription by R…	cytoplasm [GO:0005737];cytosol [GO:0005829];endoplasmic reticulum membrane [GO:0005789];mitochondrial outer membrane [GO:0005741];nuclear envelope [GO:0005635];nuclear membrane [GO:0031965];nucleoplasm [GO:0005654];nucleus [GO:0005634]	phosphatidate phosphatase activity [GO:0008195];transcription coactivator activity [GO:0003713]	GO:0003713;GO:0005634;GO:0005635;GO:0005654;GO:0005737;GO:0005741;GO:0005789;GO:0005829;GO:0006642;GO:0006646;GO:0006656;GO:0007077;GO:0008195;GO:0009062;GO:0019432;GO:0031100;GO:0031965;GO:0032869;GO:0045944;GO:0120162
PPP3R1	P63098	Calcineurin subunit B type 1	7	57.6	19.3	172.35	2.00994	0.562347	26.5041	NaN	26.4121	26.1537	26.2706	26.0245	25.574	26.0598	25.6169	25.4656	25.1723	25.8988	26.1873	calcineurin-NFAT signaling cascade [GO:0033173];Fc-epsilon receptor signaling pathway [GO:0038095];positive regulation of protein insertion into mitochondrial membrane involved in apoptotic signaling pathway [GO:1900740];positive regulation of transcription by RNA polymerase II [GO:0045944];Wnt signaling pathway, calcium modulating pathway [GO:0007223]	calcineurin complex [GO:0005955];cytosol [GO:0005829];mitochondrion [GO:0005739];nucleoplasm [GO:0005654];sarcolemma [GO:0042383]	calcium-dependent protein serine/threonine phosphatase activity [GO:0004723];calcium ion binding [GO:0005509];calmodulin binding [GO:0005516];cyclosporin A binding [GO:0016018];phosphatase binding [GO:0019902];protein domain specific binding [GO:0019904]	GO:0004723;GO:0005509;GO:0005516;GO:0005654;GO:0005739;GO:0005829;GO:0005955;GO:0007223;GO:0016018;GO:0019902;GO:0019904;GO:0033173;GO:0038095;GO:0042383;GO:0045944;GO:1900740
PYGB	P11216	Glycogen phosphorylase, brain form	23	32.6	96.695	322.83	4.6628	0.560812	27.3864	27.4716	27.4291	27.6934	27.7811	27.6582	26.8311	27.1175	27.0999	27.0424	27.1528	26.9429	26.8775	glycogen catabolic process [GO:0005980];neutrophil degranulation [GO:0043312]	azurophil granule lumen [GO:0035578];cytoplasm [GO:0005737];extracellular exosome [GO:0070062];extracellular region [GO:0005576];membrane [GO:0016020]	glycogen phosphorylase activity [GO:0008184];linear malto-oligosaccharide phosphorylase activity [GO:0102250];pyridoxal phosphate binding [GO:0030170];SHG alpha-glucan phosphorylase activity [GO:0102499]	GO:0005576;GO:0005737;GO:0005980;GO:0008184;GO:0016020;GO:0030170;GO:0035578;GO:0043312;GO:0070062;GO:0102250;GO:0102499
TMEM131	Q92545	Transmembrane protein 131	8	5.6	205.14	11.304	2.97685	0.55814	23.3981	23.461	23.6483	23.9968	23.2999	23.3926	23.1331	22.9218	23.0815	23.0628	23.2014	22.6512	22.7706		integral component of membrane [GO:0016021]		GO:0016021
ZAK	Q9NYL2	Mitogen-activated protein kinase kinase kinase MLT	5	7.9	91.154	15.224	1.90175	0.557705	25.8161	25.7645	26.178	25.2187	25.8896	25.6079	25.1607	25.1602	25.247	24.6577	25.4812	25.7149	24.8948	activation of JUN kinase activity [GO:0007257];activation of MAPKK activity [GO:0000186];cell cycle arrest [GO:0007050];cell death [GO:0008219];cell differentiation [GO:0030154];cell population proliferation [GO:0008283];cellular response to gamma radiation [GO:0071480];cytoskeleton organization [GO:0007010];DNA damage checkpoint [GO:0000077];embryonic digit morphogenesis [GO:0042733];limb develo…	cytoplasm [GO:0005737];cytosol [GO:0005829];nucleus [GO:0005634]	ATP binding [GO:0005524];magnesium ion binding [GO:0000287];MAP kinase kinase kinase activity [GO:0004709];protein serine/threonine kinase activity [GO:0004674];RNA binding [GO:0003723]	GO:0000077;GO:0000186;GO:0000287;GO:0003723;GO:0004674;GO:0004709;GO:0005524;GO:0005634;GO:0005737;GO:0005829;GO:0006468;GO:0007010;GO:0007050;GO:0007093;GO:0007257;GO:0008219;GO:0008283;GO:0030154;GO:0042733;GO:0043065;GO:0051403;GO:0060173;GO:0071480
COL12A1	Q99715	Collagen alpha-1(XII) chain	87	39.1	333.14	323.31	1.59778	0.557184	27.8532	27.9398	28.0705	27.8479	27.5568	27.6529	27.4901	26.8253	27.2456	27.2588	28.1392	27.2968	26.5852	cell adhesion [GO:0007155];collagen fibril organization [GO:0030199];endodermal cell differentiation [GO:0035987];growth plate cartilage chondrocyte morphogenesis [GO:0003429]	collagen-containing extracellular matrix [GO:0062023];collagen type XII trimer [GO:0005595];endoplasmic reticulum lumen [GO:0005788];extracellular exosome [GO:0070062];extracellular matrix [GO:0031012];extracellular region [GO:0005576];extracellular space [GO:0005615];extracellular vesicle [GO:1903561]	extracellular matrix structural constituent conferring tensile strength [GO:0030020]	GO:0003429;GO:0005576;GO:0005595;GO:0005615;GO:0005788;GO:0007155;GO:0030020;GO:0030199;GO:0031012;GO:0035987;GO:0062023;GO:0070062;GO:1903561
MPZL1	O95297	Myelin protein zero-like protein 1	4	18.2	29.082	41.626	1.52381	0.556143	26.1907	26.7233	26.7393	NaN	25.7376	26.0252	26.0322	25.6319	NaN	25.7857	25.2556	25.9333	25.7237	cell-cell signaling [GO:0007267];transmembrane receptor protein tyrosine kinase signaling pathway [GO:0007169]	cell surface [GO:0009986];focal adhesion [GO:0005925];integral component of plasma membrane [GO:0005887]	structural molecule activity [GO:0005198]	GO:0005198;GO:0005887;GO:0005925;GO:0007169;GO:0007267;GO:0009986
P4HA1	P13674	Prolyl 4-hydroxylase subunit alpha-1	21	49.1	61.049	323.31	1.55224	0.554238	28.9759	29.0621	28.9499	27.9098	28.2889	28.2056	27.7484	27.6794	28.3193	28.1735	27.7666	27.9948	28.3959	collagen fibril organization [GO:0030199];peptidyl-proline hydroxylation to 4-hydroxy-L-proline [GO:0018401]	endoplasmic reticulum [GO:0005783];endoplasmic reticulum lumen [GO:0005788];intracellular membrane-bounded organelle [GO:0043231];membrane [GO:0016020];mitochondrion [GO:0005739];procollagen-proline 4-dioxygenase complex [GO:0016222]	identical protein binding [GO:0042802];iron ion binding [GO:0005506];L-ascorbic acid binding [GO:0031418];oxidoreductase activity, acting on single donors with incorporation of molecular oxygen, incorporation of two atoms of oxygen [GO:0016702];procollagen-proline 4-dioxygenase activity [GO:0004656]	GO:0004656;GO:0005506;GO:0005739;GO:0005783;GO:0005788;GO:0016020;GO:0016222;GO:0016702;GO:0018401;GO:0030199;GO:0031418;GO:0042802;GO:0043231
GRHPR	Q9UBQ7	Glyoxylate reductase/hydroxypyruvate reductase	10	34.5	35.668	79.085	1.66443	0.55227	27.518	27.6885	28.4164	28.5862	28.7657	27.7639	27.4061	27.6826	27.6511	27.4126	27.68	27.4482	27.7153	cellular nitrogen compound metabolic process [GO:0034641];dicarboxylic acid metabolic process [GO:0043648];excretion [GO:0007588];glyoxylate metabolic process [GO:0046487];oxidation-reduction process [GO:0055114];protein complex oligomerization [GO:0051259]	cytoplasm [GO:0005737];cytosol [GO:0005829];extracellular exosome [GO:0070062];peroxisomal matrix [GO:0005782]	carboxylic acid binding [GO:0031406];glycerate dehydrogenase activity [GO:0008465];glyoxylate reductase (NADP) activity [GO:0030267];hydroxypyruvate reductase activity [GO:0016618];NAD binding [GO:0051287];NADPH binding [GO:0070402];oxidoreductase activity, acting on the CH-OH group of donors, NAD or NADP as acceptor [GO:0016616];protein homodimerization activity [GO:0042803]	GO:0005737;GO:0005782;GO:0005829;GO:0007588;GO:0008465;GO:0016616;GO:0016618;GO:0030267;GO:0031406;GO:0034641;GO:0042803;GO:0043648;GO:0046487;GO:0051259;GO:0051287;GO:0055114;GO:0070062;GO:0070402
MPRIP	Q6WCQ1	Myosin phosphatase Rho-interacting protein	30	37.5	116.53	323.31	2.27462	0.549588	24.7235	25.0984	24.7272	24.9264	24.9274	24.6394	23.9319	24.3096	24.5823	24.3387	23.698	24.5485	24.6268		actin cytoskeleton [GO:0015629];cytosol [GO:0005829];focal adhesion [GO:0005925]	actin binding [GO:0003779];cadherin binding [GO:0045296]	GO:0003779;GO:0005829;GO:0005925;GO:0015629;GO:0045296
PPP6R3	Q5H9R7	Serine/threonine-protein phosphatase 6 regulatory subunit 3	8	12.6	97.668	61.356	3.66635	0.548713	25.5664	25.6067	25.8408	25.9154	25.531	25.7462	25.3347	24.938	25.2907	25.4137	24.8917	25.136	25.0618	COPII vesicle coating [GO:0048208];regulation of phosphoprotein phosphatase activity [GO:0043666]	cytosol [GO:0005829];Golgi membrane [GO:0000139];nucleoplasm [GO:0005654];plasma membrane [GO:0005886]	protein phosphatase binding [GO:0019903]	GO:0000139;GO:0005654;GO:0005829;GO:0005886;GO:0019903;GO:0043666;GO:0048208
EHD2	Q9NZN4	EH domain-containing protein 2	25	62.8	61.161	323.31	1.75438	0.548251	30.5569	30.4394	30.6956	30.8736	30.4972	30.523	29.5937	30.6551	29.8806	30.1001	29.5839	29.8609	30.6713	blood coagulation [GO:0007596];cortical actin cytoskeleton organization [GO:0030866];endocytic recycling [GO:0032456];endocytosis [GO:0006897];plasma membrane tubulation [GO:0097320];positive regulation of endocytic recycling [GO:2001137];positive regulation of myoblast fusion [GO:1901741];protein localization to plasma membrane [GO:0072659]	caveola [GO:0005901];cytosol [GO:0005829];endosome membrane [GO:0010008];extracellular exosome [GO:0070062];extrinsic component of membrane [GO:0019898];intercellular bridge [GO:0045171];microtubule cytoskeleton [GO:0015630];nucleus [GO:0005634];perinuclear region of cytoplasm [GO:0048471];plasma membrane [GO:0005886];recycling endosome membrane [GO:0055038]	ATP binding [GO:0005524];calcium ion binding [GO:0005509];GTP binding [GO:0005525];hydrolase activity [GO:0016787];identical protein binding [GO:0042802];nucleic acid binding [GO:0003676];protein domain specific binding [GO:0019904]	GO:0003676;GO:0005509;GO:0005524;GO:0005525;GO:0005634;GO:0005829;GO:0005886;GO:0005901;GO:0006897;GO:0007596;GO:0010008;GO:0015630;GO:0016787;GO:0019898;GO:0019904;GO:0030866;GO:0032456;GO:0042802;GO:0045171;GO:0048471;GO:0055038;GO:0070062;GO:0072659;GO:0097320;GO:1901741;GO:2001137
CYP20A1	Q6UW02	Cytochrome P450 20A1	8	20.8	52.432	31.609	2.61083	0.547338	24.174	23.8792	23.9267	23.7303	23.7758	24.0179	23.474	23.063	23.4866	23.8867	23.421	23.3041	22.9546		integral component of membrane [GO:0016021];membrane [GO:0016020]	heme binding [GO:0020037];iron ion binding [GO:0005506];monooxygenase activity [GO:0004497];oxidoreductase activity, acting on paired donors, with incorporation or reduction of molecular oxygen [GO:0016705]	GO:0004497;GO:0005506;GO:0016020;GO:0016021;GO:0016705;GO:0020037
OCRL	Q01968	Inositol polyphosphate 5-phosphatase OCRL-1	8	11.4	104.2	22.411	1.4455	0.545814	24.4011	24.1778	24.2987	24.2384	23.576	23.5798	23.5299	23.6675	23.9747	23.7636	22.5799	23.4978	23.483	cilium assembly [GO:0060271];inositol phosphate dephosphorylation [GO:0046855];inositol phosphate metabolic process [GO:0043647];in utero embryonic development [GO:0001701];lipid metabolic process [GO:0006629];membrane organization [GO:0061024];phosphatidylinositol biosynthetic process [GO:0006661];phosphatidylinositol dephosphorylation [GO:0046856];regulation of GTPase activity [GO:0043087];regu…	clathrin-coated pit [GO:0005905];clathrin-coated vesicle [GO:0030136];cytoplasm [GO:0005737];cytosol [GO:0005829];early endosome [GO:0005769];early endosome membrane [GO:0031901];Golgi-associated vesicle [GO:0005798];Golgi stack [GO:0005795];membrane [GO:0016020];nucleus [GO:0005634];phagocytic vesicle membrane [GO:0030670];photoreceptor outer segment [GO:0001750];plasma membrane [GO:0005886];tra…	GTPase activator activity [GO:0005096];inositol-1,3,4,5-tetrakisphosphate 5-phosphatase activity [GO:0052659];inositol-1,4,5-trisphosphate 5-phosphatase activity [GO:0052658];inositol phosphate phosphatase activity [GO:0052745];inositol-polyphosphate 5-phosphatase activity [GO:0004445];phosphatidylinositol-4,5-bisphosphate 5-phosphatase activity [GO:0004439];Rac GTPase binding [GO:0048365]	GO:0001701;GO:0001750;GO:0004439;GO:0004445;GO:0005096;GO:0005634;GO:0005737;GO:0005769;GO:0005795;GO:0005798;GO:0005802;GO:0005829;GO:0005886;GO:0005905;GO:0006629;GO:0006661;GO:0007165;GO:0016020;GO:0030136;GO:0030670;GO:0031901;GO:0043087;GO:0043647;GO:0046855;GO:0046856;GO:0048365;GO:0051056;GO:0052658;GO:0052659;GO:0052745;GO:0060271;GO:0061024
SGCD	Q92629	Delta-sarcoglycan	5	21.8	32.071	98.759	1.37936	0.543764	27.3017	27.1792	27.4556	27.1438	27.0869	27.0538	26.7146	25.6001	26.9912	27.2038	27.1537	26.5875	26.3673	calcium ion homeostasis [GO:0055074];calcium-mediated signaling [GO:0019722];cardiac muscle cell contraction [GO:0086003];cardiac muscle fiber development [GO:0048739];cardiac muscle tissue development [GO:0048738];cell death [GO:0008219];cellular protein-containing complex localization [GO:0034629];coronary vasculature morphogenesis [GO:0060977];heart contraction [GO:0060047];muscle organ develo…	cytoskeleton [GO:0005856];dystrophin-associated glycoprotein complex [GO:0016010];integral component of membrane [GO:0016021];plasma membrane [GO:0005886];sarcoglycan complex [GO:0016012];sarcolemma [GO:0042383];sarcoplasmic reticulum [GO:0016529]		GO:0005856;GO:0005886;GO:0007517;GO:0008219;GO:0016010;GO:0016012;GO:0016021;GO:0016529;GO:0019722;GO:0034629;GO:0042383;GO:0048738;GO:0048739;GO:0055074;GO:0060047;GO:0060977;GO:0086003
ATP6V1C1	P21283	V-type proton ATPase subunit C 1	9	24.3	43.941	315.52	3.26377	0.541876	24.9358	24.4837	24.8642	24.3922	24.5263	24.4573	24.2304	24.2331	24.1966	24.0801	23.8429	23.8122	24.0811	insulin receptor signaling pathway [GO:0008286];ion transmembrane transport [GO:0034220];phagosome acidification [GO:0090383];proton transmembrane transport [GO:1902600];regulation of macroautophagy [GO:0016241];transferrin transport [GO:0033572]	apical part of cell [GO:0045177];cytoplasmic vesicle [GO:0031410];cytosol [GO:0005829];extracellular exosome [GO:0070062];lysosomal membrane [GO:0005765];plasma membrane [GO:0005886];proton-transporting two-sector ATPase complex [GO:0016469];vacuolar proton-transporting V-type ATPase, V1 domain [GO:0000221]	proton-exporting ATPase activity, phosphorylative mechanism [GO:0008553];proton-transporting ATPase activity, rotational mechanism [GO:0046961];transporter activity [GO:0005215]	GO:0000221;GO:0005215;GO:0005765;GO:0005829;GO:0005886;GO:0008286;GO:0008553;GO:0016241;GO:0016469;GO:0031410;GO:0033572;GO:0034220;GO:0045177;GO:0046961;GO:0070062;GO:0090383;GO:1902600
COMT	P21964	Catechol O-methyltransferase	7	35.1	30.037	96.29	1.70189	0.538769	25.6423	25.0712	25.6295	26.124	25.8035	25.7213	25.2139	25.5407	25.4745	25.1178	25.2438	24.7744	24.5207	catecholamine catabolic process [GO:0042424];cellular response to phosphate starvation [GO:0016036];developmental process [GO:0032502];dopamine catabolic process [GO:0042420];dopamine metabolic process [GO:0042417];estrogen metabolic process [GO:0008210];female pregnancy [GO:0007565];learning [GO:0007612];methylation [GO:0032259];multicellular organismal reproductive process [GO:0048609];negative…	axon [GO:0030424];cell body [GO:0044297];cytosol [GO:0005829];dendrite [GO:0030425];dendritic spine [GO:0043197];extracellular exosome [GO:0070062];integral component of membrane [GO:0016021];intracellular membrane-bounded organelle [GO:0043231];membrane [GO:0016020];plasma membrane [GO:0005886];postsynaptic membrane [GO:0045211]	catechol O-methyltransferase activity [GO:0016206];L-dopa O-methyltransferase activity [GO:0102084];magnesium ion binding [GO:0000287];methyltransferase activity [GO:0008168];O-methyltransferase activity [GO:0008171];orcinol O-methyltransferase activity [GO:0102938]	GO:0000287;GO:0005829;GO:0005886;GO:0007565;GO:0007612;GO:0007614;GO:0008168;GO:0008171;GO:0008210;GO:0014070;GO:0016020;GO:0016021;GO:0016036;GO:0016206;GO:0030424;GO:0030425;GO:0032259;GO:0032496;GO:0032502;GO:0035814;GO:0042135;GO:0042417;GO:0042420;GO:0042424;GO:0042493;GO:0043197;GO:0043231;GO:0043627;GO:0044297;GO:0045211;GO:0045963;GO:0048265;GO:0048609;GO:0048662;GO:0050668;GO:0051930;GO:…
LZIC	Q8WZA0	Protein LZIC	6	35.3	21.494	105.5	3.2882	0.535898	24.3324	24.2352	24.4225	24.4145	24.4868	24.3526	23.6714	23.8797	24.0804	23.5819	24.1754	23.9728	23.5052	response to ionizing radiation [GO:0010212]		beta-catenin binding [GO:0008013]	GO:0008013;GO:0010212
TALDO1	P37837	Transaldolase	6	18.4	37.54	30.454	2.28454	0.535395	28.4285	28.6644	28.5214	28.846	28.5309	28.2159	27.7561	28.3594	27.6699	28.0769	28.4882	27.7464	27.8971	carbohydrate metabolic process [GO:0005975];fructose 6-phosphate metabolic process [GO:0006002];glyceraldehyde-3-phosphate metabolic process [GO:0019682];interleukin-12-mediated signaling pathway [GO:0035722];pentose-phosphate shunt [GO:0006098];pentose-phosphate shunt, non-oxidative branch [GO:0009052];xylulose biosynthetic process [GO:0005999]	cytoplasm [GO:0005737];cytosol [GO:0005829];extracellular exosome [GO:0070062];nucleoplasm [GO:0005654];nucleus [GO:0005634]	monosaccharide binding [GO:0048029];sedoheptulose-7-phosphate:D-glyceraldehyde-3-phosphate glyceronetransferase activity [GO:0004801]	GO:0004801;GO:0005634;GO:0005654;GO:0005737;GO:0005829;GO:0005975;GO:0005999;GO:0006002;GO:0006098;GO:0009052;GO:0019682;GO:0035722;GO:0048029;GO:0070062
LAMTOR1	Q6IAA8	Ragulator complex protein LAMTOR1	7	67.1	17.745	124.08	2.02333	0.530969	25.7332	25.8548	25.6809	26.5742	25.8213	25.2628	25.2306	25.2007	25.442	25.2799	25.5082	25.2446	25.1256	cell cycle arrest [GO:0007050];cellular protein localization [GO:0034613];cellular response to amino acid stimulus [GO:0071230];cholesterol homeostasis [GO:0042632];endosomal transport [GO:0016197];endosome organization [GO:0007032];lysosome localization [GO:0032418];lysosome organization [GO:0007040];neutrophil degranulation [GO:0043312];positive regulation of MAPK cascade [GO:0043410];positive …	azurophil granule membrane [GO:0035577];extracellular exosome [GO:0070062];ficolin-1-rich granule membrane [GO:0101003];late endosome membrane [GO:0031902];lysosomal membrane [GO:0005765];lysosome [GO:0005764];membrane raft [GO:0045121];plasma membrane [GO:0005886];Ragulator complex [GO:0071986];specific granule membrane [GO:0035579]	GTPase binding [GO:0051020]	GO:0001558;GO:0001919;GO:0005764;GO:0005765;GO:0005886;GO:0007032;GO:0007040;GO:0007050;GO:0010872;GO:0010874;GO:0016197;GO:0016241;GO:0031902;GO:0032008;GO:0032418;GO:0034613;GO:0035577;GO:0035579;GO:0042632;GO:0043312;GO:0043410;GO:0045121;GO:0051020;GO:0060620;GO:0070062;GO:0071230;GO:0071986;GO:0101003
FAM114A1	Q8IWE2	Protein NOXP20	17	43.2	60.741	323.31	3.3792	0.530087	29.3465	29.3246	29.6602	29.5222	29.3119	29.181	28.9536	28.4763	28.8136	29.149	28.8919	28.7881	28.9544		cytosol [GO:0005829];Golgi apparatus [GO:0005794];nucleoplasm [GO:0005654];nucleus [GO:0005634]		GO:0005634;GO:0005654;GO:0005794;GO:0005829
UQCRC2	P22695	Cytochrome b-c1 complex subunit 2, mitochondrial	12	41.7	48.442	323.31	1.54568	0.528876	26.9499	26.5796	27.3352	27.267	27.722	27.3817	26.7679	26.978	26.8241	26.0822	26.9274	26.9216	26.238	aerobic respiration [GO:0009060];mitochondrial electron transport, ubiquinol to cytochrome c [GO:0006122];oxidative phosphorylation [GO:0006119];protein processing involved in protein targeting to mitochondrion [GO:0006627];response to drug [GO:0042493]	mitochondrial inner membrane [GO:0005743];mitochondrial processing peptidase complex [GO:0017087];mitochondrial respiratory chain complex III [GO:0005750];mitochondrial respiratory chain complex IV [GO:0005751];mitochondrion [GO:0005739];nucleoplasm [GO:0005654]	metal ion binding [GO:0046872];metalloendopeptidase activity [GO:0004222];protein-containing complex binding [GO:0044877]	GO:0004222;GO:0005654;GO:0005739;GO:0005743;GO:0005750;GO:0005751;GO:0006119;GO:0006122;GO:0006627;GO:0009060;GO:0017087;GO:0042493;GO:0044877;GO:0046872
RRAGA	Q7L523	Ras-related GTP-binding protein A	3	12.8	36.566	105.67	2.67176	0.528495	25.6438	26.2208	26.0466	25.5918	26.2453	26.1156	25.5806	25.3475	25.3648	25.3566	25.2472	25.4423	25.8028	apoptotic process [GO:0006915];cell cycle arrest [GO:0007050];cell death [GO:0008219];cellular protein localization [GO:0034613];cellular response to amino acid starvation [GO:0034198];cellular response to amino acid stimulus [GO:0071230];cellular response to starvation [GO:0009267];modulation by virus of host morphology or physiology [GO:0019048];negative regulation of autophagy [GO:0010507];pos…	cytoplasm [GO:0005737];cytosol [GO:0005829];EGO complex [GO:0034448];Gtr1-Gtr2 GTPase complex [GO:1990131];lysosomal membrane [GO:0005765];lysosome [GO:0005764];nucleus [GO:0005634]	GTPase activity [GO:0003924];GTP binding [GO:0005525];phosphoprotein binding [GO:0051219];protein heterodimerization activity [GO:0046982];protein homodimerization activity [GO:0042803];ubiquitin protein ligase binding [GO:0031625]	GO:0003924;GO:0005525;GO:0005634;GO:0005737;GO:0005764;GO:0005765;GO:0005829;GO:0006915;GO:0007050;GO:0008219;GO:0009267;GO:0010506;GO:0010507;GO:0016241;GO:0016567;GO:0019048;GO:0031625;GO:0032008;GO:0034198;GO:0034448;GO:0034613;GO:0042803;GO:0045919;GO:0046982;GO:0051219;GO:0071230;GO:1904263;GO:1990131
COTL1	Q14019	Coactosin-like protein	9	52.8	15.945	49.278	2.28676	0.528394	27.8324	28.0342	27.7971	28.2547	28.292	27.8347	27.8638	26.9927	27.7098	27.547	27.4778	27.6172	27.1455	defense response to fungus [GO:0050832];neutrophil degranulation [GO:0043312];regulation of actin filament polymerization [GO:0030833]	cortical actin cytoskeleton [GO:0030864];extracellular exosome [GO:0070062];extracellular region [GO:0005576];ficolin-1-rich granule lumen [GO:1904813];nucleus [GO:0005634];plasma membrane [GO:0005886];secretory granule lumen [GO:0034774]	actin binding [GO:0003779];actin filament binding [GO:0051015];enzyme binding [GO:0019899]	GO:0003779;GO:0005576;GO:0005634;GO:0005886;GO:0019899;GO:0030833;GO:0030864;GO:0034774;GO:0043312;GO:0050832;GO:0051015;GO:0070062;GO:1904813
ATP5L	O75964	ATP synthase subunit g, mitochondrial	3	35.9	11.428	12.022	1.33866	0.527131	25.0852	25.0562	25.2363	25.5481	25.5244	NaN	NaN	25.1597	NaN	24.9952	24.2187	NaN	24.6781	ATP biosynthetic process [GO:0006754];ATP synthesis coupled proton transport [GO:0015986];cristae formation [GO:0042407];mitochondrial ATP synthesis coupled proton transport [GO:0042776]	mitochondrial inner membrane [GO:0005743];mitochondrial proton-transporting ATP synthase complex [GO:0005753];mitochondrial proton-transporting ATP synthase complex, coupling factor F(o) [GO:0000276];mitochondrion [GO:0005739]	proton transmembrane transporter activity [GO:0015078];transmembrane transporter activity [GO:0022857]	GO:0000276;GO:0005739;GO:0005743;GO:0005753;GO:0006754;GO:0015078;GO:0015986;GO:0022857;GO:0042407;GO:0042776
ATP2A1	O14983	Sarcoplasmic/endoplasmic reticulum calcium ATPase 1	15	16.6	110.25	8.9675	1.3111	0.526342	27.5754	26.8264	26.9523	26.5629	26.8883	26.4147	26.1091	25.8968	26.4161	26.9987	26.5412	26.6919	25.7517	apoptotic mitochondrial changes [GO:0008637];calcium ion import [GO:0070509];calcium ion import into sarcoplasmic reticulum [GO:1990036];calcium ion transmembrane transport [GO:0070588];calcium ion transport [GO:0006816];cellular calcium ion homeostasis [GO:0006874];intrinsic apoptotic signaling pathway in response to endoplasmic reticulum stress [GO:0070059];ion transmembrane transport [GO:00342…	calcium channel complex [GO:0034704];endoplasmic reticulum-Golgi intermediate compartment [GO:0005793];endoplasmic reticulum membrane [GO:0005789];H zone [GO:0031673];I band [GO:0031674];integral component of membrane [GO:0016021];membrane [GO:0016020];mitochondrion [GO:0005739];perinuclear region of cytoplasm [GO:0048471];platelet dense tubular network membrane [GO:0031095];sarcoplasmic reticulu…	ATPase activity [GO:0016887];ATP binding [GO:0005524];calcium ion binding [GO:0005509];calcium transmembrane transporter activity, phosphorylative mechanism [GO:0005388];protein homodimerization activity [GO:0042803];proton-exporting ATPase activity, phosphorylative mechanism [GO:0008553]	GO:0005388;GO:0005509;GO:0005524;GO:0005739;GO:0005789;GO:0005793;GO:0006816;GO:0006874;GO:0006942;GO:0008553;GO:0008637;GO:0016020;GO:0016021;GO:0016529;GO:0016887;GO:0031095;GO:0031448;GO:0031673;GO:0031674;GO:0032470;GO:0032471;GO:0033017;GO:0034220;GO:0034704;GO:0034976;GO:0042803;GO:0045988;GO:0048471;GO:0051561;GO:0051659;GO:0070059;GO:0070509;GO:0070588;GO:0090076;GO:0106134;GO:1901896;GO:…
NONO	Q15233	Non-POU domain-containing octamer-binding protein	7	17.2	54.231	15.038	1.44585	0.52396	24.8699	24.6346	NaN	24.7753	23.9928	NaN	24.578	24.0877	24.1018	24.0786	23.6431	24.1061	23.7141	activation of innate immune response [GO:0002218];circadian rhythm [GO:0007623];DNA recombination [GO:0006310];DNA repair [GO:0006281];innate immune response [GO:0045087];mRNA processing [GO:0006397];negative regulation of oxidative stress-induced neuron intrinsic apoptotic signaling pathway [GO:1903377];negative regulation of transcription, DNA-templated [GO:0045892];regulation of circadian rhyt…	membrane [GO:0016020];nuclear matrix [GO:0016363];nuclear speck [GO:0016607];nucleolus [GO:0005730];nucleoplasm [GO:0005654];nucleus [GO:0005634];paraspeckles [GO:0042382];RNA polymerase II transcription factor complex [GO:0090575]	chromatin binding [GO:0003682];E-box binding [GO:0070888];identical protein binding [GO:0042802];RNA binding [GO:0003723];RNA polymerase II distal enhancer sequence-specific DNA binding [GO:0000980];transcription regulatory region sequence-specific DNA binding [GO:0000976]	GO:0000976;GO:0000980;GO:0002218;GO:0003682;GO:0003723;GO:0005634;GO:0005654;GO:0005730;GO:0006281;GO:0006310;GO:0006397;GO:0007623;GO:0008380;GO:0016020;GO:0016363;GO:0016607;GO:0042382;GO:0042752;GO:0042802;GO:0045087;GO:0045892;GO:0070888;GO:0090575;GO:1903377
PPP1R12C	Q9BZL4	Protein phosphatase 1 regulatory subunit 12C	19	35.9	84.88	113.67	1.56832	0.521068	23.6858	23.8669	23.5752	23.8115	23.9044	23.7208	22.7911	23.437	23.3192	22.9637	22.8852	23.0758	24.2058	signal transduction [GO:0007165]	cytoplasm [GO:0005737];cytoskeleton [GO:0005856]	enzyme inhibitor activity [GO:0004857];phosphatase regulator activity [GO:0019208];protein kinase binding [GO:0019901]	GO:0004857;GO:0005737;GO:0005856;GO:0007165;GO:0019208;GO:0019901
SNX27	Q96L92	Sorting nexin-27	11	22	61.264	138	3.95979	0.520399	25.5862	25.7244	25.6573	25.6683	25.6036	25.6545	25.2519	24.9199	25.2008	25.0922	25.0198	25.5068	24.9091	endosomal transport [GO:0016197];endosome to lysosome transport [GO:0008333];establishment of natural killer cell polarity [GO:0001770];intracellular protein transport [GO:0006886];retrograde transport, endosome to plasma membrane [GO:1990126];signal transduction [GO:0007165]	cytosol [GO:0005829];early endosome [GO:0005769];early endosome membrane [GO:0031901];endosome [GO:0005768];immunological synapse [GO:0001772];nucleoplasm [GO:0005654]	phosphatidylinositol-3-phosphate binding [GO:0032266];phosphatidylinositol binding [GO:0035091]	GO:0001770;GO:0001772;GO:0005654;GO:0005768;GO:0005769;GO:0005829;GO:0006886;GO:0007165;GO:0008333;GO:0016197;GO:0031901;GO:0032266;GO:0035091;GO:1990126
DNPEP	Q9ULA0	Aspartyl aminopeptidase	6	21	53.41	19.571	1.91279	0.519336	26.7042	26.7197	26.7913	26.283	26.2733	26.309	25.9533	25.2601	26.0695	26.0277	26.0285	26.228	26.3914	peptide metabolic process [GO:0006518]	blood microparticle [GO:0072562];cytoplasm [GO:0005737];cytosol [GO:0005829];extracellular region [GO:0005576];nucleus [GO:0005634]	aminopeptidase activity [GO:0004177];identical protein binding [GO:0042802];metalloaminopeptidase activity [GO:0070006];zinc ion binding [GO:0008270]	GO:0004177;GO:0005576;GO:0005634;GO:0005737;GO:0005829;GO:0006518;GO:0008270;GO:0042802;GO:0070006;GO:0072562
ARPC1A	Q92747	Actin-related protein 2/3 complex subunit 1A	5	17.3	41.569	45.42	2.68951	0.519034	26.832	26.5688	27.0016	27.2303	26.8045	26.8589	26.2992	26.6879	26.1187	26.6672	26.1773	26.1441	26.4511	actin cytoskeleton organization [GO:0030036];Arp2/3 complex-mediated actin nucleation [GO:0034314];ephrin receptor signaling pathway [GO:0048013];Fc-gamma receptor signaling pathway involved in phagocytosis [GO:0038096];membrane organization [GO:0061024]	actin cytoskeleton [GO:0015629];Arp2/3 protein complex [GO:0005885];cytosol [GO:0005829];extracellular exosome [GO:0070062];nucleus [GO:0005634];site of double-strand break [GO:0035861]	actin binding [GO:0003779];actin filament binding [GO:0051015]	GO:0003779;GO:0005634;GO:0005829;GO:0005885;GO:0015629;GO:0030036;GO:0034314;GO:0035861;GO:0038096;GO:0048013;GO:0051015;GO:0061024;GO:0070062
TBC1D10B	Q4KMP7	TBC1 domain family member 10B	13	25.6	87.198	67.951	2.46854	0.514758	24.4892	24.3314	24.7686	24.8983	24.5574	24.073	24.0293	23.8169	24.3089	24.186	23.9204	23.7405	24.0322	activation of GTPase activity [GO:0090630];intracellular protein transport [GO:0006886];regulation of GTPase activity [GO:0043087];retrograde transport, endosome to Golgi [GO:0042147]	cytosol [GO:0005829];plasma membrane [GO:0005886]	GTPase activator activity [GO:0005096];Rab GTPase binding [GO:0017137]	GO:0005096;GO:0005829;GO:0005886;GO:0006886;GO:0017137;GO:0042147;GO:0043087;GO:0090630
MUT	P22033	Methylmalonyl-CoA mutase, mitochondrial	11	19.3	83.134	112.38	2.41809	0.511021	24.8673	24.6943	24.7332	25.135	25.5066	25.4339	24.4886	24.5592	24.5011	24.7439	24.4893	24.6507	24.4222	cobalamin metabolic process [GO:0009235];homocysteine metabolic process [GO:0050667];positive regulation of GTPase activity [GO:0043547];post-embryonic development [GO:0009791];short-chain fatty acid catabolic process [GO:0019626]	mitochondrial matrix [GO:0005759];mitochondrion [GO:0005739]	cobalamin binding [GO:0031419];GTPase activity [GO:0003924];identical protein binding [GO:0042802];metal ion binding [GO:0046872];methylmalonyl-CoA mutase activity [GO:0004494];modified amino acid binding [GO:0072341];protein homodimerization activity [GO:0042803]	GO:0003924;GO:0004494;GO:0005739;GO:0005759;GO:0009235;GO:0009791;GO:0019626;GO:0031419;GO:0042802;GO:0042803;GO:0043547;GO:0046872;GO:0050667;GO:0072341
TMEM43	Q9BTV4	Transmembrane protein 43	15	51	44.875	273.6	2.73903	0.50706	28.4321	28.6971	28.5581	28.1469	28.1814	28.2394	27.8788	27.6978	28.0589	27.707	27.7298	28.281	27.7279	nuclear membrane organization [GO:0071763]	endoplasmic reticulum lumen [GO:0005788];Golgi apparatus [GO:0005794];integral component of nuclear inner membrane [GO:0005639];membrane [GO:0016020]	protein self-association [GO:0043621]	GO:0005639;GO:0005788;GO:0005794;GO:0016020;GO:0043621;GO:0071763
TOR1AIP1	Q5JTV8	Torsin-1A-interacting protein 1	12	33.1	66.248	323.31	3.56967	0.50686	26.3397	26.649	26.4002	26.6014	26.5225	26.4009	25.9725	25.8463	26.3678	25.9347	26.0216	26.011	25.6973	nuclear membrane organization [GO:0071763];positive regulation of ATPase activity [GO:0032781];protein localization to nuclear envelope [GO:0090435];protein localization to nucleus [GO:0034504]	integral component of membrane [GO:0016021];nuclear inner membrane [GO:0005637];nuclear membrane [GO:0031965];nucleus [GO:0005634]	ATPase activator activity [GO:0001671];ATPase binding [GO:0051117];cytoskeletal protein binding [GO:0008092];lamin binding [GO:0005521]	GO:0001671;GO:0005521;GO:0005634;GO:0005637;GO:0008092;GO:0016021;GO:0031965;GO:0032781;GO:0034504;GO:0051117;GO:0071763;GO:0090435
TRUB1	Q8WWH5	Probable tRNA pseudouridine synthase 1	5	16.9	37.252	14.356	1.6945	0.5067	24.0051	24.1147	24.3907	24.2954	24.0361	24.0535	24.2694	23.5444	23.9241	23.8456	23.2298	23.6909	22.9938	mRNA pseudouridine synthesis [GO:1990481];tRNA modification [GO:0006400]	cytosol [GO:0005829];mitochondrion [GO:0005739];nucleus [GO:0005634]	pseudouridine synthase activity [GO:0009982];RNA binding [GO:0003723]	GO:0003723;GO:0005634;GO:0005739;GO:0005829;GO:0006400;GO:0009982;GO:1990481
EPB41L2	O43491	Band 4.1-like protein 2	40	43.9	112.59	323.31	1.4471	0.503901	27.2381	27.2332	27.2692	28.027	27.8952	27.8843	27.1765	26.4305	27.0452	27.0077	27.4917	27.5464	26.9129	actomyosin structure organization [GO:0031032];cell cycle [GO:0007049];cell division [GO:0051301];cortical actin cytoskeleton organization [GO:0030866];positive regulation of protein localization to cell cortex [GO:1904778]	cell cortex region [GO:0099738];cell junction [GO:0030054];cytosol [GO:0005829];extracellular exosome [GO:0070062];focal adhesion [GO:0005925];nucleoplasm [GO:0005654];nucleus [GO:0005634];plasma membrane [GO:0005886];spectrin [GO:0008091]	actin binding [GO:0003779];PH domain binding [GO:0042731];spectrin binding [GO:0030507];structural molecule activity [GO:0005198]	GO:0003779;GO:0005198;GO:0005634;GO:0005654;GO:0005829;GO:0005886;GO:0005925;GO:0007049;GO:0008091;GO:0030054;GO:0030507;GO:0030866;GO:0031032;GO:0042731;GO:0051301;GO:0070062;GO:0099738;GO:1904778
CPOX	P36551	Oxygen-dependent coproporphyrinogen-III oxidase, mitochondrial	7	17.8	50.151	101	2.32767	0.503664	24.7254	24.5356	24.7993	25.0402	24.6933	24.8057	24.3514	24.3427	24.0887	24.2081	24.6372	24.5234	23.6889	heme biosynthetic process [GO:0006783];protoporphyrinogen IX biosynthetic process [GO:0006782];response to arsenic-containing substance [GO:0046685];response to insecticide [GO:0017085];response to iron ion [GO:0010039];response to lead ion [GO:0010288];response to methylmercury [GO:0051597]	cytoplasm [GO:0005737];cytosol [GO:0005829];mitochondrial inner membrane [GO:0005743];mitochondrial intermembrane space [GO:0005758];mitochondrion [GO:0005739]	coproporphyrinogen oxidase activity [GO:0004109];protein homodimerization activity [GO:0042803];structural constituent of eye lens [GO:0005212]	GO:0004109;GO:0005212;GO:0005737;GO:0005739;GO:0005743;GO:0005758;GO:0005829;GO:0006782;GO:0006783;GO:0010039;GO:0010288;GO:0017085;GO:0042803;GO:0046685;GO:0051597
CUL5	Q93034	Cullin-5	12	17.6	90.954	80.724	3.24391	0.502128	23.8639	24.1961	24.181	23.988	23.8899	23.5863	23.4544	23.7694	23.3373	23.4255	23.4367	23.3842	23.3339	ERBB2 signaling pathway [GO:0038128];G1/S transition of mitotic cell cycle [GO:0000082];intrinsic apoptotic signaling pathway [GO:0097193];post-translational protein modification [GO:0043687];proteasome-mediated ubiquitin-dependent protein catabolic process [GO:0043161];SCF-dependent proteasomal ubiquitin-dependent protein catabolic process [GO:0031146];ubiquitin-dependent protein catabolic proce…	Cul5-RING ubiquitin ligase complex [GO:0031466];cullin-RING ubiquitin ligase complex [GO:0031461];cytosol [GO:0005829];SCF ubiquitin ligase complex [GO:0019005]	calcium channel activity [GO:0005262];signaling receptor activity [GO:0038023];ubiquitin protein ligase binding [GO:0031625];ubiquitin-protein transferase activity [GO:0004842]	GO:0000082;GO:0004842;GO:0005262;GO:0005829;GO:0006511;GO:0016032;GO:0019005;GO:0031146;GO:0031461;GO:0031466;GO:0031625;GO:0038023;GO:0038128;GO:0043161;GO:0043687;GO:0097193
NUMBL	Q9Y6R0	Numb-like protein	9	17.7	64.891	111.43	1.9342	0.500477	24.6971	24.8284	24.772	25.192	25.3331	25.1804	24.1138	24.1861	24.6413	24.5445	24.2568	24.9341	24.8234	adherens junction organization [GO:0034332];axonogenesis [GO:0007409];cytokine-mediated signaling pathway [GO:0019221];lateral ventricle development [GO:0021670];nervous system development [GO:0007399];neuroblast division in subventricular zone [GO:0021849];positive regulation of neurogenesis [GO:0050769];protein metabolic process [GO:0019538]	cytoplasm [GO:0005737]		GO:0005737;GO:0007399;GO:0007409;GO:0019221;GO:0019538;GO:0021670;GO:0021849;GO:0034332;GO:0050769
CYB5R3	P00387	NADH-cytochrome b5 reductase 3;NADH-cytochrome b5 reductase 3 membrane-bound form;NADH-cytochrome b5 reductase 3 soluble form	17	53.8	34.234	213.37	1.6723	0.499284	31.2249	31.0536	31.3662	30.2408	31.2922	30.9095	30.4526	30.4579	30.4708	30.5073	30.1131	30.6649	30.9401	blood circulation [GO:0008015];cholesterol biosynthetic process [GO:0006695];L-ascorbic acid metabolic process [GO:0019852];neutrophil degranulation [GO:0043312];xenobiotic metabolic process [GO:0006805]	azurophil granule lumen [GO:0035578];cytoplasm [GO:0005737];endoplasmic reticulum [GO:0005783];endoplasmic reticulum membrane [GO:0005789];extracellular region [GO:0005576];hemoglobin complex [GO:0005833];lipid droplet [GO:0005811];membrane [GO:0016020];mitochondrial outer membrane [GO:0005741];mitochondrion [GO:0005739]	ADP binding [GO:0043531];AMP binding [GO:0016208];cytochrome-b5 reductase activity, acting on NAD(P)H [GO:0004128];FAD binding [GO:0071949];NAD binding [GO:0051287]	GO:0004128;GO:0005576;GO:0005737;GO:0005739;GO:0005741;GO:0005783;GO:0005789;GO:0005811;GO:0005833;GO:0006695;GO:0006805;GO:0008015;GO:0016020;GO:0016208;GO:0019852;GO:0035578;GO:0043312;GO:0043531;GO:0051287;GO:0071949
OSBPL2	Q9H1P3	Oxysterol-binding protein-related protein 2	4	11.7	55.201	35.492	3.32635	0.495472	23.1353	22.9655	22.795	23.1416	22.9853	22.9795	22.7097	22.5396	22.319	22.2937	22.2439	22.6744	22.7539	bile acid biosynthetic process [GO:0006699];cholesterol transport [GO:0030301];intracellular cholesterol transport [GO:0032367];phospholipid transport [GO:0015914];plasma membrane organization [GO:0007009];protein homotetramerization [GO:0051289]	cytosol [GO:0005829];extrinsic component of cytoplasmic side of plasma membrane [GO:0031234];intracellular membrane-bounded organelle [GO:0043231];lipid droplet [GO:0005811];membrane [GO:0016020]	cholesterol binding [GO:0015485];cholesterol transfer activity [GO:0120020];lipid binding [GO:0008289];phosphatidylinositol-4,5-bisphosphate binding [GO:0005546];phosphatidylinositol transfer activity [GO:0008526];sterol binding [GO:0032934];sterol transporter activity [GO:0015248]	GO:0005546;GO:0005811;GO:0005829;GO:0006699;GO:0007009;GO:0008289;GO:0008526;GO:0015248;GO:0015485;GO:0015914;GO:0016020;GO:0030301;GO:0031234;GO:0032367;GO:0032934;GO:0043231;GO:0051289;GO:0120020
PFKL	P17858	ATP-dependent 6-phosphofructokinase, liver type	18	26.7	85.018	64.509	1.75546	0.494572	27.6703	27.6401	27.8175	27.159	27.1616	27.0041	26.93	26.6557	26.8123	27.0714	27.1329	26.4574	27.3399	canonical glycolysis [GO:0061621];fructose 1,6-bisphosphate metabolic process [GO:0030388];fructose 6-phosphate metabolic process [GO:0006002];glucose catabolic process [GO:0006007];glycolytic process [GO:0006096];negative regulation of insulin secretion [GO:0046676];neutrophil degranulation [GO:0043312];protein complex oligomerization [GO:0051259];protein homotetramerization [GO:0051289];respons…	6-phosphofructokinase complex [GO:0005945];cytosol [GO:0005829];extracellular exosome [GO:0070062];extracellular region [GO:0005576];ficolin-1-rich granule lumen [GO:1904813];membrane [GO:0016020];secretory granule lumen [GO:0034774]	6-phosphofructokinase activity [GO:0003872];AMP binding [GO:0016208];ATP binding [GO:0005524];fructose-6-phosphate binding [GO:0070095];fructose binding [GO:0070061];identical protein binding [GO:0042802];kinase binding [GO:0019900];metal ion binding [GO:0046872];monosaccharide binding [GO:0048029]	GO:0003872;GO:0005524;GO:0005576;GO:0005829;GO:0005945;GO:0006002;GO:0006007;GO:0006096;GO:0009749;GO:0016020;GO:0016208;GO:0019900;GO:0030388;GO:0034774;GO:0042802;GO:0043312;GO:0046676;GO:0046872;GO:0048029;GO:0051259;GO:0051289;GO:0061621;GO:0070061;GO:0070062;GO:0070095;GO:1904813
PRCC	Q92733	Proline-rich protein PRCC	6	25.9	52.417	54.598	1.53878	0.493083	24.0134	24.4795	24.5382	24.5896	23.9214	23.857	24.2573	23.8531	23.4878	23.4777	23.454	24.2083	23.4427	mitotic cell cycle checkpoint [GO:0007093];mRNA splicing, via spliceosome [GO:0000398]	nuclear speck [GO:0016607];nucleoplasm [GO:0005654];nucleus [GO:0005634]		GO:0000398;GO:0005634;GO:0005654;GO:0007093;GO:0016607
FAT4	Q6V0I7	Protocadherin Fat 4	11	3.9	542.68	17.121	1.54667	0.493012	22.5017	23.0205	22.7101	NaN	NaN	22.2704	22.0131	21.9251	22.2625	22.1413	22.6451	21.7206	22.2211	branching involved in ureteric bud morphogenesis [GO:0001658];cell-cell adhesion [GO:0098609];cerebral cortex development [GO:0021987];condensed mesenchymal cell proliferation [GO:0072137];digestive tract development [GO:0048565];fibroblast growth factor receptor signaling pathway [GO:0008543];heart morphogenesis [GO:0003007];heterophilic cell-cell adhesion via plasma membrane cell adhesion molec…	apical part of cell [GO:0045177];extracellular exosome [GO:0070062];integral component of membrane [GO:0016021];plasma membrane [GO:0005886]	calcium ion binding [GO:0005509]	GO:0001658;GO:0003007;GO:0005509;GO:0005886;GO:0007009;GO:0007156;GO:0007157;GO:0007219;GO:0008543;GO:0016021;GO:0021987;GO:0022008;GO:0035329;GO:0043931;GO:0045177;GO:0048565;GO:0060122;GO:0070062;GO:0072137;GO:0072307;GO:0098609
SCYL2	Q6P3W7	SCY1-like protein 2	10	15.1	103.71	323.31	2.28897	0.489126	25.2363	25.7871	25.4121	25.4859	25.1624	NaN	24.8665	24.9595	25.1549	24.6162	24.7833	25.2828	24.8302	endosome to lysosome transport [GO:0008333];negative regulation of canonical Wnt signaling pathway [GO:0090090];positive regulation of clathrin-dependent endocytosis [GO:2000370];positive regulation of receptor internalization [GO:0002092];receptor internalization involved in canonical Wnt signaling pathway [GO:2000286]	clathrin-coated vesicle [GO:0030136];endosome membrane [GO:0010008];Golgi apparatus [GO:0005794];perinuclear region of cytoplasm [GO:0048471]	ATP binding [GO:0005524];protein kinase activity [GO:0004672];signaling receptor binding [GO:0005102]	GO:0002092;GO:0004672;GO:0005102;GO:0005524;GO:0005794;GO:0008333;GO:0010008;GO:0030136;GO:0048471;GO:0090090;GO:2000286;GO:2000370
44447	Q92599	Septin-8	13	26.1	55.756	93.94	1.40099	0.486767	25.9513	26.2294	26.2407	25.8853	26.2223	26.266	25.0685	25.6505	25.9607	26.547	25.3283	25.5486	25.4166	cytoskeleton-dependent cytokinesis [GO:0061640];regulation of intracellular protein transport [GO:0033157];regulation of protein stability [GO:0031647];regulation of SNARE complex assembly [GO:0035542]	axon [GO:0030424];cell junction [GO:0030054];microtubule cytoskeleton [GO:0015630];presynapse [GO:0098793];septin complex [GO:0031105];septin ring [GO:0005940];synaptic vesicle membrane [GO:0030672]	GTPase activity [GO:0003924];GTP binding [GO:0005525]	GO:0003924;GO:0005525;GO:0005940;GO:0015630;GO:0030054;GO:0030424;GO:0030672;GO:0031105;GO:0031647;GO:0033157;GO:0035542;GO:0061640;GO:0098793
SP100	P23497	Nuclear autoantigen Sp-100	9	11.8	100.42	20.798	1.91939	0.486275	23.3017	23.5229	23.552	22.69	23.3247	23.5058	23.0937	22.7082	22.4295	22.9691	22.998	22.5685	23.0424	DNA damage response, signal transduction by p53 class mediator resulting in transcription of p21 class mediator [GO:0006978];interferon-gamma-mediated signaling pathway [GO:0060333];maintenance of protein location [GO:0045185];negative regulation of cellular component movement [GO:0051271];negative regulation of DNA binding [GO:0043392];negative regulation of DNA-binding transcription factor acti…	cytoplasm [GO:0005737];nuclear body [GO:0016604];nuclear chromosome, telomeric region [GO:0000784];nuclear periphery [GO:0034399];nucleolus [GO:0005730];nucleoplasm [GO:0005654];nucleus [GO:0005634];PML body [GO:0016605]	chromo shadow domain binding [GO:0070087];DNA binding [GO:0003677];DNA-binding transcription factor activity, RNA polymerase II-specific [GO:0000981];identical protein binding [GO:0042802];kinase binding [GO:0019900];protein dimerization activity [GO:0046983];protein domain specific binding [GO:0019904];protein homodimerization activity [GO:0042803];transcription factor binding [GO:0008134]	GO:0000122;GO:0000723;GO:0000784;GO:0000981;GO:0003677;GO:0005634;GO:0005654;GO:0005730;GO:0005737;GO:0006978;GO:0008134;GO:0010596;GO:0016032;GO:0016604;GO:0016605;GO:0019900;GO:0019904;GO:0032526;GO:0032897;GO:0034097;GO:0034340;GO:0034341;GO:0034399;GO:0042802;GO:0042803;GO:0043392;GO:0043433;GO:0045185;GO:0045765;GO:0045892;GO:0045893;GO:0046826;GO:0046983;GO:0048384;GO:0051091;GO:0051271;GO:…
MAP2K2	P36507	Dual specificity mitogen-activated protein kinase kinase 2	17	39.2	44.424	323.31	2.39947	0.485759	27.0959	27.3196	27.2837	27.5143	27.2549	27.2517	26.7557	26.247	26.9615	26.9111	26.8603	27.2182	26.6527	activation of MAPK activity [GO:0000187];activation of protein kinase activity [GO:0032147];ERK1 and ERK2 cascade [GO:0070371];MAPK cascade [GO:0000165];negative regulation of gene expression [GO:0010629];peptidyl-serine autophosphorylation [GO:0036289];positive regulation of production of miRNAs involved in gene silencing by miRNA [GO:1903800];positive regulation of protein serine/threonine kina…	cell-cell junction [GO:0005911];cytoplasm [GO:0005737];cytoplasmic side of plasma membrane [GO:0009898];cytosol [GO:0005829];early endosome [GO:0005769];endoplasmic reticulum [GO:0005783];extracellular region [GO:0005576];focal adhesion [GO:0005925];Golgi apparatus [GO:0005794];late endosome [GO:0005770];microtubule [GO:0005874];mitochondrion [GO:0005739];nucleus [GO:0005634];perinuclear region o…	ATP binding [GO:0005524];MAP kinase kinase activity [GO:0004708];metal ion binding [GO:0046872];PDZ domain binding [GO:0030165];protein serine/threonine/tyrosine kinase activity [GO:0004712];protein serine/threonine kinase activator activity [GO:0043539];protein serine/threonine kinase activity [GO:0004674];protein tyrosine kinase activity [GO:0004713];scaffold protein binding [GO:0097110]	GO:0000165;GO:0000187;GO:0004674;GO:0004708;GO:0004712;GO:0004713;GO:0005524;GO:0005576;GO:0005634;GO:0005737;GO:0005739;GO:0005769;GO:0005770;GO:0005778;GO:0005783;GO:0005794;GO:0005829;GO:0005874;GO:0005911;GO:0005925;GO:0009898;GO:0010629;GO:0023014;GO:0030165;GO:0031098;GO:0032147;GO:0032872;GO:0036289;GO:0043539;GO:0045893;GO:0046872;GO:0048471;GO:0070371;GO:0071902;GO:0090170;GO:0097110;GO:…
ALDOA	P04075	Fructose-bisphosphate aldolase A	25	67.9	39.42	323.31	1.69385	0.485281	31.2933	31.2514	31.4782	31.1095	30.4557	30.5019	30.477	30.3348	30.6903	30.8406	30.4636	30.3382	30.5636	actin filament organization [GO:0007015];ATP biosynthetic process [GO:0006754];binding of sperm to zona pellucida [GO:0007339];canonical glycolysis [GO:0061621];fructose 1,6-bisphosphate metabolic process [GO:0030388];fructose metabolic process [GO:0006000];gluconeogenesis [GO:0006094];glycolytic process [GO:0006096];muscle cell cellular homeostasis [GO:0046716];neutrophil degranulation [GO:00433…	actin cytoskeleton [GO:0015629];cytosol [GO:0005829];extracellular exosome [GO:0070062];extracellular region [GO:0005576];extracellular space [GO:0005615];ficolin-1-rich granule lumen [GO:1904813];I band [GO:0031674];M band [GO:0031430];membrane [GO:0016020];nucleus [GO:0005634];platelet alpha granule lumen [GO:0031093];secretory granule lumen [GO:0034774];sperm head [GO:0061827];tertiary granule…	actin binding [GO:0003779];cadherin binding [GO:0045296];cytoskeletal protein binding [GO:0008092];fructose binding [GO:0070061];fructose-bisphosphate aldolase activity [GO:0004332];identical protein binding [GO:0042802];RNA binding [GO:0003723];tubulin binding [GO:0015631]	GO:0002576;GO:0003723;GO:0003779;GO:0004332;GO:0005576;GO:0005615;GO:0005634;GO:0005829;GO:0006000;GO:0006094;GO:0006096;GO:0006754;GO:0006941;GO:0007015;GO:0007339;GO:0008092;GO:0008360;GO:0015629;GO:0015631;GO:0016020;GO:0030388;GO:0031093;GO:0031430;GO:0031674;GO:0034774;GO:0042802;GO:0043312;GO:0045296;GO:0046716;GO:0051289;GO:0061621;GO:0061827;GO:0070061;GO:0070062;GO:1904724;GO:1904813
UGDH	O60701	UDP-glucose 6-dehydrogenase	25	63.6	55.023	323.31	1.85219	0.485011	30.0168	30.0735	30.1411	29.7712	29.9311	30.0447	28.9781	29.2531	29.4861	29.2504	29.6467	30.0739	29.8913	carbohydrate metabolic process [GO:0005975];chondroitin sulfate biosynthetic process [GO:0030206];gastrulation with mouth forming second [GO:0001702];glycosaminoglycan biosynthetic process [GO:0006024];heparan sulfate proteoglycan biosynthetic process [GO:0015012];protein hexamerization [GO:0034214];UDP-glucuronate biosynthetic process [GO:0006065]	cytosol [GO:0005829];extracellular exosome [GO:0070062];nucleoplasm [GO:0005654];nucleus [GO:0005634]	NAD binding [GO:0051287];UDP-glucose 6-dehydrogenase activity [GO:0003979]	GO:0001702;GO:0003979;GO:0005634;GO:0005654;GO:0005829;GO:0005975;GO:0006024;GO:0006065;GO:0015012;GO:0030206;GO:0034214;GO:0051287;GO:0070062
RAB8B	Q92930	Ras-related protein Rab-8B	5	25.1	23.584	120.1	1.78256	0.48393	24.2994	24.2971	23.7648	23.85	NaN	24.0874	22.8966	23.6494	23.6927	23.6515	23.6136	23.869	23.6576	adherens junction organization [GO:0034332];antigen processing and presentation [GO:0019882];cellular response to insulin stimulus [GO:0032869];Golgi vesicle fusion to target membrane [GO:0048210];intracellular protein transport [GO:0006886];positive regulation of cell projection organization [GO:0031346];positive regulation of corticotropin secretion [GO:0051461];protein import into peroxisome m…	cell tip [GO:0051286];endosome [GO:0005768];extracellular exosome [GO:0070062];intracellular membrane-bounded organelle [GO:0043231];nuclear body [GO:0016604];nucleoplasm [GO:0005654];perinuclear region of cytoplasm [GO:0048471];peroxisomal membrane [GO:0005778];phagocytic vesicle [GO:0045335];phagocytic vesicle membrane [GO:0030670];plasma membrane [GO:0005886];recycling endosome membrane [GO:00…	GDP binding [GO:0019003];GTPase activity [GO:0003924];GTP binding [GO:0005525];signaling receptor binding [GO:0005102];TPR domain binding [GO:0030911]	GO:0003924;GO:0005102;GO:0005525;GO:0005654;GO:0005768;GO:0005778;GO:0005886;GO:0006886;GO:0006904;GO:0008021;GO:0009306;GO:0016604;GO:0017157;GO:0019003;GO:0019882;GO:0030140;GO:0030670;GO:0030911;GO:0031346;GO:0032482;GO:0032869;GO:0034332;GO:0043231;GO:0045046;GO:0045335;GO:0048210;GO:0048471;GO:0051286;GO:0051461;GO:0055038;GO:0070062;GO:0072659
FAM21C	Q9Y4E1	WASH complex subunit FAM21C	34	37.7	144.91	323.31	1.41795	0.480122	23.706	23.9391	23.9725	23.4373	23.5134	23.0787	22.6426	23.2382	23.4126	23.576	22.8038	23.4795	22.7412	negative regulation of barbed-end actin filament capping [GO:2000813];protein localization to endosome [GO:0036010];protein transport [GO:0015031];regulation of substrate adhesion-dependent cell spreading [GO:1900024];retrograde transport, endosome to Golgi [GO:0042147];retrograde transport, endosome to plasma membrane [GO:1990126]	cytosol [GO:0005829];early endosome [GO:0005769];early endosome membrane [GO:0031901];endosome [GO:0005768];intracellular membrane-bounded organelle [GO:0043231];nucleolus [GO:0005730];plasma membrane [GO:0005886];WASH complex [GO:0071203]	phosphatidylinositol-3,4,5-trisphosphate binding [GO:0005547];phosphatidylinositol-3,4-bisphosphate binding [GO:0043325];phosphatidylinositol-3,5-bisphosphate binding [GO:0080025];phosphatidylinositol-3-phosphate binding [GO:0032266];phosphatidylinositol-4,5-bisphosphate binding [GO:0005546];phosphatidylinositol-4-phosphate binding [GO:0070273];phosphatidylinositol-5-phosphate binding [GO:0010314…	GO:0005546;GO:0005547;GO:0005730;GO:0005768;GO:0005769;GO:0005829;GO:0005886;GO:0010314;GO:0015031;GO:0031901;GO:0032266;GO:0036010;GO:0042147;GO:0043231;GO:0043325;GO:0070273;GO:0071203;GO:0080025;GO:1900024;GO:1905394;GO:1990126;GO:2000813
SLC9A3R1	O14745	Na(+)/H(+) exchange regulatory cofactor NHE-RF1	9	34.1	38.868	76.652	1.3321	0.478774	24.6937	25.056	24.9715	25.4463	25.3446	25.4502	24.4321	24.3272	25.0714	24.9432	25.1888	24.8151	23.9934	actin cytoskeleton organization [GO:0030036];adenylate cyclase-activating dopamine receptor signaling pathway [GO:0007191];auditory receptor cell stereocilium organization [GO:0060088];bile acid secretion [GO:0032782];cellular phosphate ion homeostasis [GO:0030643];establishment of epithelial cell apical/basal polarity [GO:0045198];establishment of Golgi localization [GO:0051683];gland morphogene…	actin cytoskeleton [GO:0015629];apical plasma membrane [GO:0016324];brush border membrane [GO:0031526];cell periphery [GO:0071944];cytoplasm [GO:0005737];endomembrane system [GO:0012505];extracellular exosome [GO:0070062];filopodium [GO:0030175];membrane [GO:0016020];membrane raft [GO:0045121];microvillus [GO:0005902];microvillus membrane [GO:0031528];perinuclear region of cytoplasm [GO:0048471];…	beta-2 adrenergic receptor binding [GO:0031698];beta-catenin binding [GO:0008013];chloride channel regulator activity [GO:0017081];dopamine receptor binding [GO:0050780];growth factor receptor binding [GO:0070851];molecular adaptor activity [GO:0060090];myosin II binding [GO:0045159];PDZ domain binding [GO:0030165];phosphatase binding [GO:0019902];protein-containing complex binding [GO:0044877];p…	GO:0001726;GO:0003096;GO:0005102;GO:0005737;GO:0005902;GO:0007097;GO:0007191;GO:0007605;GO:0008013;GO:0008285;GO:0008360;GO:0008361;GO:0010642;GO:0012505;GO:0014067;GO:0015629;GO:0016020;GO:0016055;GO:0016324;GO:0017081;GO:0019902;GO:0022612;GO:0030033;GO:0030036;GO:0030165;GO:0030175;GO:0030336;GO:0030643;GO:0031526;GO:0031528;GO:0031698;GO:0031982;GO:0032415;GO:0032416;GO:0032426;GO:0032782;GO:…
ITSN2	Q9NZM3	Intersectin-2	10	8.2	193.46	46.906	2.01193	0.477677	23.7642	22.8728	23.3526	23.0586	22.7324	22.9269	22.5178	22.475	22.7922	22.8225	22.6284	22.5466	22.6991	endocytosis [GO:0006897];positive regulation of dendrite extension [GO:1903861];regulation of Rho protein signal transduction [GO:0035023];viral process [GO:0016032]	centrosome [GO:0005813];cytoplasm [GO:0005737];extracellular exosome [GO:0070062]	calcium ion binding [GO:0005509];Rho guanyl-nucleotide exchange factor activity [GO:0005089];SH3/SH2 adaptor activity [GO:0005070]	GO:0005070;GO:0005089;GO:0005509;GO:0005737;GO:0005813;GO:0006897;GO:0016032;GO:0035023;GO:0070062;GO:1903861
LLGL1	Q15334	Lethal(2) giant larvae protein homolog 1	6	7.7	115.42	15.683	1.79922	0.47763	24.4245	24.3295	24.1915	24.9912	24.5441	25.0293	24.104	24.2249	23.6629	24.5119	23.9978	24.0893	24.161	axonogenesis [GO:0007409];cortical actin cytoskeleton organization [GO:0030866];establishment of spindle orientation [GO:0051294];exocytosis [GO:0006887];Golgi to plasma membrane transport [GO:0006893];protein-containing complex assembly [GO:0065003];regulation of establishment or maintenance of cell polarity [GO:0032878];regulation of Notch signaling pathway [GO:0008593]	axon [GO:0030424];cortical actin cytoskeleton [GO:0030864];cytoplasm [GO:0005737];cytoskeleton [GO:0005856];early endosome membrane [GO:0031901];Golgi cis cisterna [GO:0000137];plasma membrane [GO:0005886];trans-Golgi network membrane [GO:0032588]	GTPase activator activity [GO:0005096];myosin II binding [GO:0045159];protein kinase binding [GO:0019901];Rab GTPase binding [GO:0017137];structural molecule activity [GO:0005198]	GO:0000137;GO:0005096;GO:0005198;GO:0005737;GO:0005856;GO:0005886;GO:0006887;GO:0006893;GO:0007409;GO:0008593;GO:0017137;GO:0019901;GO:0030424;GO:0030864;GO:0030866;GO:0031901;GO:0032588;GO:0032878;GO:0045159;GO:0051294;GO:0065003
PPP1R2P3;PPP1R2	Q6NXS1;P41236	Protein phosphatase inhibitor 2-like protein 3;Protein phosphatase inhibitor 2	5	32.2	23.106	37.919	1.67335	0.471488	24.6401	24.5043	24.4048	24.7703	24.4407	24.6257	24.5158	24.2067	24.4671	24.3264	23.3948	23.9835	23.7554	generation of precursor metabolites and energy [GO:0006091];glycogen metabolic process [GO:0005977];regulation of phosphoprotein phosphatase activity [GO:0043666];regulation of signal transduction [GO:0009966];glycogen metabolic process [GO:0005977];regulation of phosphoprotein phosphatase activity [GO:0043666];regulation of signal transduction [GO:0009966]		protein phosphatase inhibitor activity [GO:0004864];protein serine/threonine phosphatase inhibitor activity [GO:0004865];protein phosphatase inhibitor activity [GO:0004864]	GO:0004864;GO:0004865;GO:0005977;GO:0006091;GO:0009966;GO:0043666;GO:0004864;GO:0005977;GO:0009966;GO:0043666
PMPCB	O75439	Mitochondrial-processing peptidase subunit beta	8	21.3	54.366	323.31	1.67816	0.468487	24.7322	24.6301	24.6637	25.3978	25.2609	25.4108	24.4852	24.5238	24.6336	24.7178	24.4085	24.9195	24.1436	mitochondrial calcium ion transmembrane transport [GO:0006851];protein processing involved in protein targeting to mitochondrion [GO:0006627]	mitochondrial inner membrane [GO:0005743];mitochondrial processing peptidase complex [GO:0017087];mitochondrion [GO:0005739]	metal ion binding [GO:0046872];metalloendopeptidase activity [GO:0004222]	GO:0004222;GO:0005739;GO:0005743;GO:0006627;GO:0006851;GO:0017087;GO:0046872
SLC25A1	P53007	Tricarboxylate transport protein, mitochondrial	4	13.8	34.012	131.81	1.88501	0.465602	26.9838	26.5023	26.7484	26.8278	26.6155	27.0722	26.7556	26.5406	26.0462	26.1479	25.9647	26.6972	26.1304	fatty-acyl-CoA biosynthetic process [GO:0046949];gluconeogenesis [GO:0006094];mitochondrial citrate transmembrane transport [GO:0006843]	extracellular exosome [GO:0070062];integral component of membrane [GO:0016021];mitochondrial inner membrane [GO:0005743];nucleus [GO:0005634]	citrate secondary active transmembrane transporter activity [GO:0071913];citrate transmembrane transporter activity [GO:0015137];tricarboxylic acid transmembrane transporter activity [GO:0015142]	GO:0005634;GO:0005743;GO:0006094;GO:0006843;GO:0015137;GO:0015142;GO:0016021;GO:0046949;GO:0070062;GO:0071913
SCLY	Q96I15	Selenocysteine lyase	4	15.3	48.148	6.5304	1.78018	0.464201	23.8918	23.7512	NaN	23.8129	23.587	24.0237	NaN	23.6182	23.1806	22.8177	23.3316	23.4643	23.6826	cellular amino acid metabolic process [GO:0006520];selenium compound metabolic process [GO:0001887];selenocysteine catabolic process [GO:0016261]	cytosol [GO:0005829]	selenocysteine lyase activity [GO:0009000];transferase activity [GO:0016740]	GO:0001887;GO:0005829;GO:0006520;GO:0009000;GO:0016261;GO:0016740
CNP	P09543	2,3-cyclic-nucleotide 3-phosphodiesterase	13	31.8	47.578	323.31	2.05803	0.463611	27.1356	27.4124	26.9519	26.7309	26.925	27.0612	26.244	27.014	26.5333	26.2609	26.5241	26.5651	26.8664	adult locomotory behavior [GO:0008344];aging [GO:0007568];axonogenesis [GO:0007409];chemical synaptic transmission [GO:0007268];cyclic nucleotide catabolic process [GO:0009214];forebrain development [GO:0030900];microtubule cytoskeleton organization [GO:0000226];oligodendrocyte differentiation [GO:0048709];regulation of mitochondrial membrane permeability [GO:0046902];response to lipopolysacchari…	cytoplasm [GO:0005737];cytosol [GO:0005829];extracellular exosome [GO:0070062];extracellular space [GO:0005615];melanosome [GO:0042470];membrane [GO:0016020];microtubule [GO:0005874];microvillus [GO:0005902];mitochondrial inner membrane [GO:0005743];mitochondrial outer membrane [GO:0005741];myelin sheath abaxonal region [GO:0035748];myelin sheath adaxonal region [GO:0035749];nucleoplasm [GO:00056…	2',3'-cyclic-nucleotide 3'-phosphodiesterase activity [GO:0004113];cyclic nucleotide binding [GO:0030551];RNA binding [GO:0003723]	GO:0000226;GO:0003723;GO:0004113;GO:0005615;GO:0005634;GO:0005654;GO:0005737;GO:0005741;GO:0005743;GO:0005829;GO:0005874;GO:0005886;GO:0005902;GO:0007268;GO:0007409;GO:0007568;GO:0008344;GO:0009214;GO:0009636;GO:0016020;GO:0021762;GO:0030551;GO:0030900;GO:0031143;GO:0032496;GO:0035748;GO:0035749;GO:0042470;GO:0046902;GO:0048471;GO:0048709;GO:0070062
DOCK1	Q14185	Dedicator of cytokinesis protein 1	22	16	215.34	310.26	3.03142	0.46293	24.6316	24.7905	24.8544	24.787	24.7393	24.5349	24.2711	24.4198	24.4243	24.1774	23.8321	24.5081	24.1874	apoptotic process [GO:0006915];blood coagulation [GO:0007596];cell migration [GO:0016477];Fc-gamma receptor signaling pathway involved in phagocytosis [GO:0038096];integrin-mediated signaling pathway [GO:0007229];phagocytosis, engulfment [GO:0006911];positive regulation of epithelial cell migration [GO:0010634];positive regulation of substrate adhesion-dependent cell spreading [GO:1900026];signal…	cytoplasm [GO:0005737];cytosol [GO:0005829];guanyl-nucleotide exchange factor complex [GO:0032045];membrane [GO:0016020];nuclear speck [GO:0016607];nucleus [GO:0005634]	GTPase activator activity [GO:0005096];Rho guanyl-nucleotide exchange factor activity [GO:0005089];SH3 domain binding [GO:0017124]	GO:0005089;GO:0005096;GO:0005634;GO:0005737;GO:0005829;GO:0006911;GO:0006915;GO:0007165;GO:0007229;GO:0007264;GO:0007596;GO:0010634;GO:0016020;GO:0016477;GO:0016607;GO:0017124;GO:0032045;GO:0038096;GO:0048010;GO:1900026
MAP4K4	O95819	Mitogen-activated protein kinase kinase kinase kinase 4	23	20.8	142.1	323.31	1.46498	0.462854	25.8833	26.0004	25.9689	26.1735	25.8536	25.6218	25.858	24.8756	25.6816	25.8797	25.216	25.7343	24.9332	activation of protein kinase activity [GO:0032147];intracellular signal transduction [GO:0035556];MAPK cascade [GO:0000165];negative regulation of apoptotic process [GO:0043066];negative regulation of cell-matrix adhesion [GO:0001953];negative regulation of insulin secretion involved in cellular response to glucose stimulus [GO:0061179];negative regulation of neuron projection regeneration [GO:00…	cytoplasm [GO:0005737];focal adhesion [GO:0005925]	ATP binding [GO:0005524];creatine kinase activity [GO:0004111];microtubule binding [GO:0008017];protein serine/threonine kinase activity [GO:0004674]	GO:0000165;GO:0001953;GO:0004111;GO:0004674;GO:0005524;GO:0005737;GO:0005925;GO:0006468;GO:0008017;GO:0023014;GO:0030335;GO:0031098;GO:0032014;GO:0032147;GO:0035556;GO:0043066;GO:0043547;GO:0046328;GO:0048812;GO:0051549;GO:0051894;GO:0061179;GO:0070571;GO:1903393
RBM12	Q9NTZ6	RNA-binding protein 12	10	12.1	97.394	18.416	1.83876	0.461087	24.8414	25.0374	24.7534	24.353	24.6528	24.342	24.2252	23.7479	24.2559	24.4883	24.2253	24.5724	23.9008		nucleoplasm [GO:0005654]	RNA binding [GO:0003723]	GO:0003723;GO:0005654
SLC25A11	Q02978	Mitochondrial 2-oxoglutarate/malate carrier protein	7	27.7	34.061	208.99	2.47136	0.458469	26.4354	26.6263	26.8238	26.736	26.9467	26.5305	26.5324	26.4583	26.0506	26.2882	26.1542	26.2748	25.8141	gluconeogenesis [GO:0006094]	integral component of plasma membrane [GO:0005887];mitochondrial inner membrane [GO:0005743];mitochondrion [GO:0005739];nucleus [GO:0005634]	oxoglutarate:malate antiporter activity [GO:0015367];RNA binding [GO:0003723]	GO:0003723;GO:0005634;GO:0005739;GO:0005743;GO:0005887;GO:0006094;GO:0015367
LDHA	P00338	L-lactate dehydrogenase A chain	20	55.1	36.688	323.31	1.9205	0.457886	33.7773	33.5842	33.5859	33.5417	33.2498	33.1541	32.7973	33.0922	33.3518	33.4713	33.0199	32.7549	32.6825	glycolytic process [GO:0006096];lactate metabolic process [GO:0006089];NAD metabolic process [GO:0019674];positive regulation of apoptotic process [GO:0043065];post-embryonic animal organ development [GO:0048569];pyruvate metabolic process [GO:0006090];response to cAMP [GO:0051591];response to estrogen [GO:0043627];response to glucose [GO:0009749];response to hydrogen peroxide [GO:0042542];respon…	cytosol [GO:0005829];extracellular exosome [GO:0070062];membrane [GO:0016020];nucleus [GO:0005634]	cadherin binding [GO:0045296];identical protein binding [GO:0042802];kinase binding [GO:0019900];L-lactate dehydrogenase activity [GO:0004459];NAD binding [GO:0051287]	GO:0001666;GO:0004459;GO:0005634;GO:0005829;GO:0006089;GO:0006090;GO:0006096;GO:0007584;GO:0009749;GO:0016020;GO:0019674;GO:0019900;GO:0021762;GO:0042542;GO:0042802;GO:0043065;GO:0043627;GO:0045296;GO:0048569;GO:0051287;GO:0051591;GO:0070062
AHCYL2	Q96HN2	Putative adenosylhomocysteinase 3	5	10.8	66.72	14.951	1.55856	0.45737	24.7219	24.9367	NaN	25.3558	25.3319	24.7556	24.8665	24.1726	24.5316	24.4812	NaN	24.4419	24.8842	one-carbon metabolic process [GO:0006730];S-adenosylmethionine cycle [GO:0033353]	cytosol [GO:0005829];endoplasmic reticulum [GO:0005783];neuron projection [GO:0043005]	hydrolase activity [GO:0016787]	GO:0005783;GO:0005829;GO:0006730;GO:0016787;GO:0033353;GO:0043005
CTBP1	Q13363	C-terminal-binding protein 1	6	15.7	47.535	73.229	2.89638	0.455382	25.3221	25.257	25.5439	25.7513	25.7086	25.4423	25.1849	24.8895	25.0132	25.1537	25.1613	25.2102	24.7289	chromatin silencing [GO:0006342];negative regulation of cell population proliferation [GO:0008285];negative regulation of histone acetylation [GO:0035067];negative regulation of histone H4 acetylation [GO:0090241];negative regulation of transcription, DNA-templated [GO:0045892];negative regulation of transcription by RNA polymerase II [GO:0000122];positive regulation of histone deacetylation [GO:…	GABA-ergic synapse [GO:0098982];glutamatergic synapse [GO:0098978];nucleoplasm [GO:0005654];nucleus [GO:0005634];presynaptic active zone cytoplasmic component [GO:0098831];transcriptional repressor complex [GO:0017053]	chromatin binding [GO:0003682];identical protein binding [GO:0042802];NAD binding [GO:0051287];oxidoreductase activity, acting on the CH-OH group of donors, NAD or NADP as acceptor [GO:0016616];protein C-terminus binding [GO:0008022];protein domain specific binding [GO:0019904];repressing transcription factor binding [GO:0070491];transcription corepressor activity [GO:0003714];transcription facto…	GO:0000122;GO:0003682;GO:0003714;GO:0005634;GO:0005654;GO:0006342;GO:0006468;GO:0008022;GO:0008134;GO:0008285;GO:0016616;GO:0017053;GO:0019079;GO:0019904;GO:0031065;GO:0035067;GO:0042802;GO:0045892;GO:0050872;GO:0051287;GO:0051726;GO:0070491;GO:0090241;GO:0098831;GO:0098978;GO:0098982
LRPPRC	P42704	Leucine-rich PPR motif-containing protein, mitochondrial	51	40	157.9	323.31	2.36374	0.454297	26.9311	26.8072	27.0166	27.3914	27.5226	27.416	26.7393	26.8777	26.689	26.5156	26.8235	26.8767	26.564	mitochondrion transport along microtubule [GO:0047497];mRNA transport [GO:0051028];negative regulation of mitochondrial RNA catabolic process [GO:0000961];regulation of mitochondrial translation [GO:0070129]	condensed nuclear chromosome [GO:0000794];cytoskeleton [GO:0005856];membrane [GO:0016020];microtubule [GO:0005874];mitochondrial nucleoid [GO:0042645];mitochondrion [GO:0005739];nuclear inner membrane [GO:0005637];nuclear outer membrane [GO:0005640];nucleoplasm [GO:0005654];nucleus [GO:0005634];perinuclear region of cytoplasm [GO:0048471];ribonucleoprotein complex [GO:1990904]	beta-tubulin binding [GO:0048487];microtubule binding [GO:0008017];RNA binding [GO:0003723];single-stranded DNA binding [GO:0003697];ubiquitin protein ligase binding [GO:0031625]	GO:0000794;GO:0000961;GO:0003697;GO:0003723;GO:0005634;GO:0005637;GO:0005640;GO:0005654;GO:0005739;GO:0005856;GO:0005874;GO:0008017;GO:0016020;GO:0031625;GO:0042645;GO:0047497;GO:0048471;GO:0048487;GO:0051028;GO:0070129;GO:1990904
HEXA	P06865	Beta-hexosaminidase subunit alpha	6	10.8	60.702	10.755	1.53478	0.451676	27.0841	26.5616	27.2013	NaN	27.3948	26.6435	26.5287	26.4399	26.9391	26.6665	26.0943	26.4192	26.5899	carbohydrate metabolic process [GO:0005975];chondroitin sulfate catabolic process [GO:0030207];glycosaminoglycan biosynthetic process [GO:0006024];glycosphingolipid metabolic process [GO:0006687];hyaluronan catabolic process [GO:0030214];keratan sulfate catabolic process [GO:0042340]	azurophil granule [GO:0042582];extracellular exosome [GO:0070062];lysosomal lumen [GO:0043202];membrane [GO:0016020]	acetylglucosaminyltransferase activity [GO:0008375];beta-N-acetylhexosaminidase activity [GO:0004563];N-acetyl-beta-D-galactosaminidase activity [GO:0102148];protein heterodimerization activity [GO:0046982]	GO:0004563;GO:0005975;GO:0006024;GO:0006687;GO:0008375;GO:0016020;GO:0030207;GO:0030214;GO:0042340;GO:0042582;GO:0043202;GO:0046982;GO:0070062;GO:0102148
IST1	P53990	IST1 homolog	3	11.3	39.75	246.11	2.08997	0.448991	25.3055	25.291	25.2549	24.8748	25.5852	24.958	24.7486	24.2765	24.7023	24.8553	24.7793	25.0388	24.9373	abscission [GO:0009838];cell division [GO:0051301];cytoskeleton-dependent cytokinesis [GO:0061640];ESCRT III complex disassembly [GO:1904903];establishment of protein localization [GO:0045184];multivesicular body assembly [GO:0036258];neutrophil degranulation [GO:0043312];positive regulation of collateral sprouting [GO:0048672];positive regulation of proteolysis [GO:0045862];protein localization …	azurophil granule lumen [GO:0035578];centrosome [GO:0005813];cytosol [GO:0005829];endoplasmic reticulum-Golgi intermediate compartment [GO:0005793];extracellular exosome [GO:0070062];extracellular region [GO:0005576];Flemming body [GO:0090543];intracellular membrane-bounded organelle [GO:0043231];midbody [GO:0030496];nuclear envelope [GO:0005635]	cadherin binding [GO:0045296];identical protein binding [GO:0042802];MIT domain binding [GO:0090541];protein-containing complex binding [GO:0044877];protein domain specific binding [GO:0019904]	GO:0005576;GO:0005635;GO:0005793;GO:0005813;GO:0005829;GO:0008104;GO:0009838;GO:0015031;GO:0019076;GO:0019904;GO:0030496;GO:0035578;GO:0036258;GO:0042802;GO:0043231;GO:0043312;GO:0044877;GO:0045184;GO:0045296;GO:0045862;GO:0046745;GO:0048672;GO:0051301;GO:0061640;GO:0070062;GO:0090541;GO:0090543;GO:1904903
DLGAP4	Q9Y2H0	Disks large-associated protein 4	5	8.7	108.01	42.298	1.37254	0.448355	23.5765	23.4844	23.6812	24.2077	24.3114	23.4335	23.3683	22.863	23.3188	23.5478	23.891	23.1374	23.2125	signaling [GO:0023052]	cholinergic synapse [GO:0098981];glutamatergic synapse [GO:0098978];neuromuscular junction [GO:0031594];plasma membrane [GO:0005886];postsynaptic specialization [GO:0099572]		GO:0005886;GO:0023052;GO:0031594;GO:0098978;GO:0098981;GO:0099572
OXSR1	O95747	Serine/threonine-protein kinase OSR1	8	18.8	58.022	323.31	2.20045	0.446775	27.6937	27.5975	27.9156	27.5245	27.4299	27.1949	26.9932	27.4324	26.9751	26.7997	26.9996	27.3865	27.2015	activation of protein kinase activity [GO:0032147];cellular hypotonic response [GO:0071476];cellular response to chemokine [GO:1990869];chemokine (C-C motif) ligand 21 signaling pathway [GO:0038116];chemokine (C-X-C motif) ligand 12 signaling pathway [GO:0038146];intracellular signal transduction [GO:0035556];negative regulation of potassium ion transmembrane transporter activity [GO:1901017];osm…	cytoplasm [GO:0005737];cytosol [GO:0005829];extracellular exosome [GO:0070062]	ATP binding [GO:0005524];identical protein binding [GO:0042802];magnesium ion binding [GO:0000287];protein kinase binding [GO:0019901];protein serine/threonine kinase activity [GO:0004674]	GO:0000287;GO:0004674;GO:0005524;GO:0005737;GO:0005829;GO:0006468;GO:0006979;GO:0007231;GO:0010820;GO:0018107;GO:0019901;GO:0023014;GO:0023016;GO:0031098;GO:0032147;GO:0035556;GO:0038116;GO:0038146;GO:0042802;GO:0046777;GO:0070062;GO:0071476;GO:1901017;GO:1990869
ATP6V1D	Q9Y5K8	V-type proton ATPase subunit D	6	27.9	28.262	33.6	1.61488	0.446239	24.9974	24.9049	24.8325	NaN	24.733	NaN	24.2455	24.6778	24.4383	24.8958	23.928	24.4741	24.2855	cilium assembly [GO:0060271];insulin receptor signaling pathway [GO:0008286];ion transmembrane transport [GO:0034220];neutrophil degranulation [GO:0043312];phagosome acidification [GO:0090383];protein localization to cilium [GO:0061512];regulation of macroautophagy [GO:0016241];transferrin transport [GO:0033572]	cytosol [GO:0005829];extracellular exosome [GO:0070062];lysosomal membrane [GO:0005765];membrane [GO:0016020];plasma membrane [GO:0005886];proton-transporting V-type ATPase complex [GO:0033176];specific granule membrane [GO:0035579]	proton-transporting ATPase activity, rotational mechanism [GO:0046961]	GO:0005765;GO:0005829;GO:0005886;GO:0008286;GO:0016020;GO:0016241;GO:0033176;GO:0033572;GO:0034220;GO:0035579;GO:0043312;GO:0046961;GO:0060271;GO:0061512;GO:0070062;GO:0090383
AKT1	P31749	RAC-alpha serine/threonine-protein kinase	8	18.8	55.686	17.646	2.93157	0.445542	23.8913	23.8483	23.9519	24.137	24.274	24.0198	23.8163	23.6644	23.5798	23.3325	23.3236	23.5041	23.8032	activation-induced cell death of T cells [GO:0006924];activation of protein kinase B activity [GO:0032148];aging [GO:0007568];anoikis [GO:0043276];apoptotic mitochondrial changes [GO:0008637];carbohydrate transport [GO:0008643];cell differentiation [GO:0030154];cell migration involved in sprouting angiogenesis [GO:0002042];cell population proliferation [GO:0008283];cell projection organization [G…	cell-cell junction [GO:0005911];ciliary basal body [GO:0036064];cytoplasm [GO:0005737];cytosol [GO:0005829];microtubule cytoskeleton [GO:0015630];mitochondrion [GO:0005739];nucleoplasm [GO:0005654];nucleus [GO:0005634];plasma membrane [GO:0005886];postsynapse [GO:0098794];protein-containing complex [GO:0032991];spindle [GO:0005819];vesicle [GO:0031982]	14-3-3 protein binding [GO:0071889];ATP binding [GO:0005524];calmodulin binding [GO:0005516];enzyme binding [GO:0019899];GTPase activating protein binding [GO:0032794];identical protein binding [GO:0042802];kinase activity [GO:0016301];nitric-oxide synthase regulator activity [GO:0030235];phosphatidylinositol-3,4,5-trisphosphate binding [GO:0005547];phosphatidylinositol-3,4-bisphosphate binding […	GO:0001649;GO:0001893;GO:0001934;GO:0001938;GO:0002042;GO:0004672;GO:0004674;GO:0004712;GO:0005080;GO:0005516;GO:0005524;GO:0005547;GO:0005634;GO:0005654;GO:0005737;GO:0005739;GO:0005819;GO:0005829;GO:0005886;GO:0005911;GO:0005978;GO:0005979;GO:0006006;GO:0006412;GO:0006417;GO:0006464;GO:0006468;GO:0006469;GO:0006606;GO:0006809;GO:0006924;GO:0006954;GO:0006974;GO:0006979;GO:0007165;GO:0007173;GO:…
UBXN7	O94888	UBX domain-containing protein 7	11	25.2	54.862	323.31	2.4312	0.44551	25.005	25.1408	25.1258	25.0114	24.8357	24.8163	24.6682	24.2136	24.7586	24.8217	24.33	24.7639	24.2497	post-translational protein modification [GO:0043687]	cytosol [GO:0005829];nuclear body [GO:0016604];nucleoplasm [GO:0005654];VCP-NPL4-UFD1 AAA ATPase complex [GO:0034098]	transcription factor binding [GO:0008134];ubiquitin binding [GO:0043130];ubiquitin protein ligase binding [GO:0031625]	GO:0005654;GO:0005829;GO:0008134;GO:0016604;GO:0031625;GO:0034098;GO:0043130;GO:0043687
NELFCD	Q8IXH7	Negative elongation factor C/D	4	9.7	66.246	14.476	1.98744	0.444755	23.4266	23.4964	23.1741	NaN	23.3557	22.7816	22.941	22.6844	22.8723	22.889	22.8565	22.9831	22.3885	negative regulation of transcription elongation from RNA polymerase II promoter [GO:0034244];positive regulation of viral transcription [GO:0050434];transcription by RNA polymerase II [GO:0006366];transcription elongation from RNA polymerase II promoter [GO:0006368]	membrane [GO:0016020];NELF complex [GO:0032021];nucleoplasm [GO:0005654]	RNA binding [GO:0003723]	GO:0003723;GO:0005654;GO:0006366;GO:0006368;GO:0016020;GO:0032021;GO:0034244;GO:0050434
GAPDH	P04406	Glyceraldehyde-3-phosphate dehydrogenase	23	80.6	36.053	323.31	2.03756	0.444536	34.6109	34.4351	34.8196	34.3359	33.9878	34.2522	33.7915	33.6375	34.1469	34.2939	33.8895	33.9499	34.0275	antimicrobial humoral immune response mediated by antimicrobial peptide [GO:0061844];canonical glycolysis [GO:0061621];cellular response to interferon-gamma [GO:0071346];defense response to fungus [GO:0050832];gluconeogenesis [GO:0006094];glycolytic process [GO:0006096];killing by host of symbiont cells [GO:0051873];killing of cells of other organism [GO:0031640];microtubule cytoskeleton organiza…	cytoplasm [GO:0005737];cytosol [GO:0005829];extracellular exosome [GO:0070062];GAIT complex [GO:0097452];intracellular membrane-bounded organelle [GO:0043231];lipid droplet [GO:0005811];membrane [GO:0016020];microtubule cytoskeleton [GO:0015630];nuclear membrane [GO:0031965];nucleus [GO:0005634];perinuclear region of cytoplasm [GO:0048471];plasma membrane [GO:0005886];ribonucleoprotein complex [G…	aspartic-type endopeptidase inhibitor activity [GO:0019828];disordered domain specific binding [GO:0097718];glyceraldehyde-3-phosphate dehydrogenase (NAD+) (phosphorylating) activity [GO:0004365];identical protein binding [GO:0042802];microtubule binding [GO:0008017];NAD binding [GO:0051287];NADP binding [GO:0050661];peptidyl-cysteine S-nitrosylase activity [GO:0035605]	GO:0000226;GO:0004365;GO:0005634;GO:0005737;GO:0005811;GO:0005829;GO:0005886;GO:0006094;GO:0006096;GO:0008017;GO:0010951;GO:0015630;GO:0016020;GO:0016241;GO:0017148;GO:0019828;GO:0031640;GO:0031965;GO:0031982;GO:0035605;GO:0035606;GO:0042802;GO:0043231;GO:0048471;GO:0050661;GO:0050715;GO:0050821;GO:0050832;GO:0051287;GO:0051402;GO:0051873;GO:0052501;GO:0061621;GO:0061844;GO:0070062;GO:0071346;GO:…
ANKMY2	Q8IV38	Ankyrin repeat and MYND domain-containing protein 2	6	16.6	49.298	7.0554	1.3671	0.444195	24.9152	25.1727	24.9634	25.7817	25.7289	25.268	25.1188	24.7525	24.7852	25.0481	24.1957	25.0281	25.0971		cilium [GO:0005929]	enzyme binding [GO:0019899];metal ion binding [GO:0046872]	GO:0005929;GO:0019899;GO:0046872
DIP2A	Q14689	Disco-interacting protein 2 homolog A	16	14.7	170.37	44.661	1.38909	0.442911	23.6377	24.3381	24.1887	23.626	23.9578	23.6098	NaN	NaN	23.34	23.6954	23.2295	23.5355	NaN	multicellular organism development [GO:0007275];negative regulation of gene expression [GO:0010629];regulation of apoptotic process [GO:0042981]	cell surface [GO:0009986];nucleus [GO:0005634]	catalytic activity [GO:0003824]	GO:0003824;GO:0005634;GO:0007275;GO:0009986;GO:0010629;GO:0042981
AGFG1	P52594	Arf-GAP domain and FG repeat-containing protein 1	11	31.5	58.259	323.31	2.90312	0.442486	27.7946	27.7021	27.8701	27.8229	27.6913	27.8527	27.5463	27.5402	27.3848	27.2694	26.8458	27.4379	27.4009	acrosome assembly [GO:0001675];intermediate filament organization [GO:0045109];membrane organization [GO:0061024];mRNA export from nucleus [GO:0006406];multicellular organism development [GO:0007275];spermatid nucleus differentiation [GO:0007289]	cell projection [GO:0042995];cytoplasmic vesicle [GO:0031410];cytosol [GO:0005829];intracellular membrane-bounded organelle [GO:0043231];neuronal cell body [GO:0043025];nuclear pore [GO:0005643]	DNA binding [GO:0003677];GTPase activator activity [GO:0005096];metal ion binding [GO:0046872];RNA binding [GO:0003723]	GO:0001675;GO:0003677;GO:0003723;GO:0005096;GO:0005643;GO:0005829;GO:0006406;GO:0007275;GO:0007289;GO:0031410;GO:0042995;GO:0043025;GO:0043231;GO:0045109;GO:0046872;GO:0061024
CUL3	Q13618	Cullin-3	20	31	88.929	221.09	1.99164	0.442356	25.5939	25.8659	25.8545	25.779	25.6456	25.4019	25.4534	25.0927	25.4695	25.3335	25.2978	25.4665	24.6211	anaphase-promoting complex-dependent catabolic process [GO:0031145];cell migration [GO:0016477];cell projection organization [GO:0030030];COPII vesicle coating [GO:0048208];embryonic cleavage [GO:0040016];endoplasmic reticulum to Golgi vesicle-mediated transport [GO:0006888];fibroblast apoptotic process [GO:0044346];G1/S transition of mitotic cell cycle [GO:0000082];gastrulation [GO:0007369];inte…	Cul3-RING ubiquitin ligase complex [GO:0031463];cullin-RING ubiquitin ligase complex [GO:0031461];cytoplasm [GO:0005737];cytosol [GO:0005829];extracellular exosome [GO:0070062];Golgi membrane [GO:0000139];membrane [GO:0016020];nucleoplasm [GO:0005654];polar microtubule [GO:0005827];SCF ubiquitin ligase complex [GO:0019005];sperm flagellum [GO:0036126]	cyclin binding [GO:0030332];Notch binding [GO:0005112];POZ domain binding [GO:0031208];protein heterodimerization activity [GO:0046982];protein homodimerization activity [GO:0042803];ubiquitin protein ligase binding [GO:0031625]	GO:0000082;GO:0000122;GO:0000139;GO:0000165;GO:0000209;GO:0001831;GO:0005112;GO:0005654;GO:0005737;GO:0005827;GO:0005829;GO:0006511;GO:0006513;GO:0006888;GO:0007080;GO:0007229;GO:0007369;GO:0008284;GO:0016020;GO:0016055;GO:0016477;GO:0016567;GO:0017145;GO:0019005;GO:0030030;GO:0030332;GO:0031145;GO:0031146;GO:0031208;GO:0031398;GO:0031461;GO:0031463;GO:0031625;GO:0031648;GO:0032467;GO:0035024;GO:…
GCLM	P48507	Glutamate--cysteine ligase regulatory subunit	5	19.3	30.727	15.45	2.27038	0.441594	26.3268	26.5742	27.0432	26.9622	26.816	26.4243	26.1319	26.481	26.3896	26.3653	26.1602	26.1384	26.0805	aging [GO:0007568];apoptotic mitochondrial changes [GO:0008637];cellular response to fibroblast growth factor stimulus [GO:0044344];cellular response to follicle-stimulating hormone stimulus [GO:0071372];cellular response to glucose stimulus [GO:0071333];cellular response to hepatocyte growth factor stimulus [GO:0035729];cellular response to leukemia inhibitory factor [GO:1990830];cellular respon…	cytosol [GO:0005829];glutamate-cysteine ligase complex [GO:0017109]	enzyme regulator activity [GO:0030234];glutamate-cysteine ligase activity [GO:0004357];glutamate-cysteine ligase catalytic subunit binding [GO:0035226];protein heterodimerization activity [GO:0046982]	GO:0004357;GO:0005829;GO:0006534;GO:0006536;GO:0006750;GO:0006979;GO:0007568;GO:0007584;GO:0008637;GO:0014823;GO:0017109;GO:0030234;GO:0035226;GO:0035229;GO:0035729;GO:0035733;GO:0042493;GO:0043524;GO:0044344;GO:0044752;GO:0046982;GO:0051409;GO:0051900;GO:0071333;GO:0071372;GO:0097069;GO:0097746;GO:1990830;GO:2001237
DCAKD	Q8WVC6	Dephospho-CoA kinase domain-containing protein	7	33.3	26.55	12.285	1.83576	0.440674	23.7722	23.3758	23.8195	24.0044	23.8007	23.4561	23.3859	23.0068	NaN	23.2601	NaN	23.4037	NaN	coenzyme A biosynthetic process [GO:0015937]	membrane [GO:0016020]	ATP binding [GO:0005524];dephospho-CoA kinase activity [GO:0004140]	GO:0004140;GO:0005524;GO:0015937;GO:0016020
AP2A1	O95782	AP-2 complex subunit alpha-1	30	41.7	107.54	282.23	2.64674	0.440622	27.823	27.6546	27.7029	28.2129	27.6034	27.7824	27.4353	27.2902	27.4027	27.2801	27.013	27.5216	27.5487	antigen processing and presentation of exogenous peptide antigen via MHC class II [GO:0019886];clathrin-dependent endocytosis [GO:0072583];endocytosis [GO:0006897];ephrin receptor signaling pathway [GO:0048013];Golgi to endosome transport [GO:0006895];intracellular protein transport [GO:0006886];low-density lipoprotein particle clearance [GO:0034383];low-density lipoprotein particle receptor cata…	AP-2 adaptor complex [GO:0030122];apical plasma membrane [GO:0016324];basolateral plasma membrane [GO:0016323];clathrin-coated endocytic vesicle [GO:0045334];clathrin-coated endocytic vesicle membrane [GO:0030669];clathrin coat of trans-Golgi network vesicle [GO:0030130];cytosol [GO:0005829];endocytic vesicle membrane [GO:0030666];endolysosome membrane [GO:0036020];filopodium tip [GO:0032433];mem…	clathrin adaptor activity [GO:0035615];low-density lipoprotein particle receptor binding [GO:0050750];protein-containing complex binding [GO:0044877];protein C-terminus binding [GO:0008022];protein kinase binding [GO:0019901]	GO:0005829;GO:0005886;GO:0006886;GO:0006895;GO:0006897;GO:0008022;GO:0010976;GO:0016020;GO:0016323;GO:0016324;GO:0019886;GO:0019901;GO:0030122;GO:0030130;GO:0030666;GO:0030669;GO:0032433;GO:0032802;GO:0034383;GO:0035615;GO:0036020;GO:0044877;GO:0045334;GO:0048013;GO:0048260;GO:0050690;GO:0050750;GO:0060071;GO:0061024;GO:0072583;GO:1900126
UBA2	Q9UBT2	SUMO-activating enzyme subunit 2	14	23.9	71.223	323.31	4.23073	0.439324	26.9015	26.9461	26.9773	26.5284	26.8606	26.8057	26.5154	26.3898	26.3438	26.2664	26.3677	26.4625	26.4355	protein modification by small protein conjugation [GO:0032446];protein sumoylation [GO:0016925]	cytoplasm [GO:0005737];nucleoplasm [GO:0005654];SUMO activating enzyme complex [GO:0031510]	ATP binding [GO:0005524];enzyme activator activity [GO:0008047];magnesium ion binding [GO:0000287];protein heterodimerization activity [GO:0046982];small protein activating enzyme binding [GO:0044388];SUMO activating enzyme activity [GO:0019948];SUMO binding [GO:0032183];transcription factor binding [GO:0008134];transferase activity [GO:0016740];ubiquitin-like protein conjugating enzyme binding […	GO:0000287;GO:0005524;GO:0005654;GO:0005737;GO:0008047;GO:0008134;GO:0016740;GO:0016925;GO:0019948;GO:0031510;GO:0032183;GO:0032446;GO:0044388;GO:0044390;GO:0046982
N4BP1	O75113	NEDD4-binding protein 1	6	10.4	100.38	46.573	2.53606	0.439051	24.5244	24.0681	24.1693	24.3024	24.1026	23.9185	23.9593	23.4573	23.697	NaN	23.8416	23.8409	23.655	cellular response to UV [GO:0034644];negative regulation of proteasomal ubiquitin-dependent protein catabolic process [GO:0032435];negative regulation of protein ubiquitination [GO:0031397]	nucleolus [GO:0005730];PML body [GO:0016605]		GO:0005730;GO:0016605;GO:0031397;GO:0032435;GO:0034644
RPA1	P27694	Replication protein A 70 kDa DNA-binding subunit;Replication protein A 70 kDa DNA-binding subunit, N-terminally processed	15	31.8	68.137	283.46	3.65369	0.438861	25.7235	26.1926	26.0064	25.8472	25.716	25.7846	25.526	25.3881	25.4043	25.5731	25.3246	25.5259	25.3347	base-excision repair [GO:0006284];cellular response to DNA damage stimulus [GO:0006974];DNA damage response, detection of DNA damage [GO:0042769];DNA-dependent DNA replication [GO:0006261];DNA recombination [GO:0006310];DNA repair [GO:0006281];DNA replication [GO:0006260];DNA unwinding involved in DNA replication [GO:0006268];double-strand break repair via homologous recombination [GO:0000724];er…	DNA replication factor A complex [GO:0005662];nuclear chromosome, telomeric region [GO:0000784];nucleoplasm [GO:0005654];nucleus [GO:0005634];PML body [GO:0016605];site of DNA damage [GO:0090734]	damaged DNA binding [GO:0003684];G-rich strand telomeric DNA binding [GO:0098505];metal ion binding [GO:0046872];sequence-specific DNA binding [GO:0043565];single-stranded DNA binding [GO:0003697];single-stranded telomeric DNA binding [GO:0043047]	GO:0000082;GO:0000723;GO:0000724;GO:0000784;GO:0003684;GO:0003697;GO:0005634;GO:0005654;GO:0005662;GO:0006260;GO:0006261;GO:0006268;GO:0006281;GO:0006283;GO:0006284;GO:0006289;GO:0006293;GO:0006294;GO:0006295;GO:0006296;GO:0006297;GO:0006298;GO:0006310;GO:0006974;GO:0007004;GO:0016605;GO:0019985;GO:0032201;GO:0033683;GO:0034502;GO:0036297;GO:0042276;GO:0042769;GO:0043047;GO:0043565;GO:0046872;GO:…
LRBA	P50851	Lipopolysaccharide-responsive and beige-like anchor protein	24	13	319.1	131.96	2.1153	0.438432	24.3235	24.2368	24.4117	24.2336	24.0258	23.7219	23.9155	23.3886	23.8581	23.6948	23.3968	23.8835	23.9058		endoplasmic reticulum [GO:0005783];Golgi apparatus [GO:0005794];integral component of membrane [GO:0016021];lysosome [GO:0005764];membrane [GO:0016020];plasma membrane [GO:0005886]		GO:0005764;GO:0005783;GO:0005794;GO:0005886;GO:0016020;GO:0016021
CLIP2	Q9UDT6	CAP-Gly domain-containing linker protein 2	27	30.7	115.84	323.31	2.13656	0.437549	25.2293	25.1024	25.2221	25.439	25.2965	25.1588	25.0749	24.4191	24.888	25.028	25.0811	24.3492	24.7864		cytoplasmic microtubule [GO:0005881];microtubule associated complex [GO:0005875];microtubule plus-end [GO:0035371]	microtubule binding [GO:0008017];microtubule plus-end binding [GO:0051010]	GO:0005875;GO:0005881;GO:0008017;GO:0035371;GO:0051010
KCTD9	Q7L273	BTB/POZ domain-containing protein KCTD9	7	23.9	42.566	21.968	1.43405	0.437421	23.9797	23.7008	23.9135	NaN	22.9965	23.7907	22.9501	22.965	23.2809	23.4189	23.0851	23.487	23.4847	intracellular signal transduction [GO:0035556];protein homooligomerization [GO:0051260];protein ubiquitination [GO:0016567]		cullin family protein binding [GO:0097602];identical protein binding [GO:0042802];protein self-association [GO:0043621]	GO:0016567;GO:0035556;GO:0042802;GO:0043621;GO:0051260;GO:0097602
HS1BP3	Q53T59	HCLS1-binding protein 3	12	45.2	42.78	212.42	1.57423	0.437345	25.4654	25.4558	25.3167	24.9407	25.1649	24.7891	24.1174	25.0205	24.9048	24.7839	24.6205	25.1179	24.695	regulation of apoptotic process [GO:0042981]	endoplasmic reticulum [GO:0005783];mitochondrion [GO:0005739]	phosphatidylinositol binding [GO:0035091]	GO:0005739;GO:0005783;GO:0035091;GO:0042981
VTI1B	Q9UEU0	Vesicle transport through interaction with t-SNAREs homolog 1B	3	19	26.688	25.41	1.38647	0.435515	22.0323	22.2171	22.4156	NaN	22.0078	NaN	NaN	22.211	21.8847	21.8256	21.6671	21.2879	21.5198	endoplasmic reticulum to Golgi vesicle-mediated transport [GO:0006888];Golgi to vacuole transport [GO:0006896];intra-Golgi vesicle-mediated transport [GO:0006891];membrane fusion [GO:0061025];platelet degranulation [GO:0002576];protein targeting to vacuole [GO:0006623];regulation of protein localization to plasma membrane [GO:1903076];retrograde transport, endosome to Golgi [GO:0042147];vesicle d…	cytosol [GO:0005829];early endosome membrane [GO:0031901];endoplasmic reticulum membrane [GO:0005789];ER to Golgi transport vesicle membrane [GO:0012507];extracellular region [GO:0005576];Golgi apparatus [GO:0005794];integral component of membrane [GO:0016021];intracellular membrane-bounded organelle [GO:0043231];late endosome membrane [GO:0031902];lysosomal membrane [GO:0005765];neuronal cell bo…	chloride channel inhibitor activity [GO:0019869];SNAP receptor activity [GO:0005484];SNARE binding [GO:0000149]	GO:0000149;GO:0002576;GO:0005484;GO:0005576;GO:0005765;GO:0005789;GO:0005794;GO:0005829;GO:0006623;GO:0006888;GO:0006891;GO:0006896;GO:0006904;GO:0008021;GO:0012507;GO:0016021;GO:0016192;GO:0019869;GO:0031093;GO:0031201;GO:0031901;GO:0031902;GO:0031982;GO:0042147;GO:0043025;GO:0043231;GO:0048280;GO:0048471;GO:0055037;GO:0055038;GO:0061025;GO:1903076
SPECC1L	Q69YQ0	Cytospin-A	9	11.7	124.6	136.58	1.73927	0.435014	22.7085	22.6802	22.3932	23.0404	23.0533	23.2849	22.2576	22.5922	22.1843	22.4138	22.1377	22.6224	22.7675	actin cytoskeleton organization [GO:0030036];cell adhesion [GO:0007155];cell cycle [GO:0007049];cell division [GO:0051301]	actin cytoskeleton [GO:0015629];cytosol [GO:0005829];filamentous actin [GO:0031941];gap junction [GO:0005921];microtubule organizing center [GO:0005815];spindle [GO:0005819]		GO:0005815;GO:0005819;GO:0005829;GO:0005921;GO:0007049;GO:0007155;GO:0015629;GO:0030036;GO:0031941;GO:0051301
HSDL2	Q6YN16	Hydroxysteroid dehydrogenase-like protein 2	16	52.2	45.394	141.09	1.65631	0.433609	27.059	26.9212	26.7461	27.115	27.2336	27.243	26.554	26.4765	26.764	25.9388	26.721	27.0681	26.8131		membrane [GO:0016020];mitochondrion [GO:0005739];peroxisome [GO:0005777]	oxidoreductase activity [GO:0016491]	GO:0005739;GO:0005777;GO:0016020;GO:0016491
PTPRM	P28827	Receptor-type tyrosine-protein phosphatase mu	8	10.7	163.68	27.627	1.60719	0.430163	23.192	23.1742	NaN	23.274	23.205	23.3675	23.1601	22.9498	23.1121	22.6822	22.9592	22.6939	22.1293	homophilic cell adhesion via plasma membrane adhesion molecules [GO:0007156];negative regulation of angiogenesis [GO:0016525];negative regulation of endothelial cell migration [GO:0010596];negative regulation of endothelial cell proliferation [GO:0001937];neuron projection development [GO:0031175];positive regulation of blood vessel diameter [GO:0097755];protein dephosphorylation [GO:0006470];res…	cell-cell adherens junction [GO:0005913];cell-cell junction [GO:0005911];cytoplasm [GO:0005737];integral component of plasma membrane [GO:0005887];lamellipodium [GO:0030027];perinuclear region of cytoplasm [GO:0048471];plasma membrane [GO:0005886]	cadherin binding [GO:0045296];identical protein binding [GO:0042802];protein tyrosine phosphatase activity [GO:0004725];transmembrane receptor protein tyrosine phosphatase activity [GO:0005001]	GO:0001937;GO:0004725;GO:0005001;GO:0005737;GO:0005886;GO:0005887;GO:0005911;GO:0005913;GO:0006470;GO:0007156;GO:0007165;GO:0010596;GO:0010842;GO:0016525;GO:0030027;GO:0031175;GO:0031290;GO:0042493;GO:0042802;GO:0045296;GO:0048471;GO:0097755
PAK2	Q13177	Serine/threonine-protein kinase PAK 2;PAK-2p27;PAK-2p34	21	50.4	58.042	323.31	3.70953	0.430152	27.9819	27.8065	27.9532	27.9397	27.9224	27.9338	27.5295	27.3007	27.6096	27.6432	27.4815	27.6892	27.1956	activation of protein kinase activity [GO:0032147];apoptotic process [GO:0006915];cell migration [GO:0016477];cellular response to organic cyclic compound [GO:0071407];dendritic spine development [GO:0060996];Fc-epsilon receptor signaling pathway [GO:0038095];interleukin-12-mediated signaling pathway [GO:0035722];negative regulation of apoptotic process [GO:0043066];negative regulation of cystein…	cytoplasm [GO:0005737];cytosol [GO:0005829];glutamatergic synapse [GO:0098978];nucleus [GO:0005634];perinuclear region of cytoplasm [GO:0048471];plasma membrane [GO:0005886];postsynaptic density [GO:0014069]	ATP binding [GO:0005524];cadherin binding [GO:0045296];identical protein binding [GO:0042802];protein kinase activity [GO:0004672];protein kinase binding [GO:0019901];protein serine/threonine kinase activity [GO:0004674];protein tyrosine kinase activator activity [GO:0030296];Rac GTPase binding [GO:0048365];small GTPase binding [GO:0031267]	GO:0002223;GO:0004672;GO:0004674;GO:0005524;GO:0005634;GO:0005737;GO:0005829;GO:0005886;GO:0006468;GO:0006469;GO:0006915;GO:0007165;GO:0014069;GO:0016310;GO:0016477;GO:0018105;GO:0019901;GO:0023014;GO:0030296;GO:0031098;GO:0031267;GO:0031295;GO:0032147;GO:0035722;GO:0038095;GO:0040008;GO:0042802;GO:0043066;GO:0043408;GO:0045296;GO:0046777;GO:0048010;GO:0048365;GO:0048471;GO:0050690;GO:0050731;GO:…
AGAP3	Q96P47	Arf-GAP with GTPase, ANK repeat and PH domain-containing protein 3	8	11.4	95.043	10.845	1.69942	0.430109	23.4951	23.7133	23.8458	NaN	NaN	23.6733	23.4338	22.8064	23.3791	23.5104	22.9033	23.4271	23.3022	cellular response to reactive oxygen species [GO:0034614];proteasome-mediated ubiquitin-dependent protein catabolic process [GO:0043161];signal transduction [GO:0007165]	cell periphery [GO:0071944];cytoplasm [GO:0005737];membrane [GO:0016020];nucleus [GO:0005634]	GTPase activator activity [GO:0005096];GTPase activity [GO:0003924];GTP binding [GO:0005525];metal ion binding [GO:0046872];polyubiquitin modification-dependent protein binding [GO:0031593]	GO:0003924;GO:0005096;GO:0005525;GO:0005634;GO:0005737;GO:0007165;GO:0016020;GO:0031593;GO:0034614;GO:0043161;GO:0046872;GO:0071944
PPP1R21	Q6ZMI0	Protein phosphatase 1 regulatory subunit 21	17	28.1	88.313	116.64	2.98108	0.429121	24.5267	24.3464	24.5243	24.4468	24.7055	24.4749	24.1246	24.0552	24.2626	24.1474	23.6196	24.1297	24.1859		early endosome [GO:0005769];membrane [GO:0016020]		GO:0005769;GO:0016020
DDRGK1	Q96HY6	DDRGK domain-containing protein 1	6	29.6	35.61	161.16	1.86322	0.425818	25.2445	25.0593	24.9611	25.2673	24.8206	25.1838	25.0447	24.5125	24.8427	24.7058	24.6246	24.8501	24.065	cartilage development [GO:0051216];negative regulation of apoptotic process [GO:0043066];negative regulation of gene expression [GO:0010629];negative regulation of proteasomal ubiquitin-dependent protein catabolic process [GO:0032435];positive regulation of cell cycle G1/S phase transition [GO:1902808];positive regulation of cell migration [GO:0030335];positive regulation of cell population proli…	cytoplasm [GO:0005737];endoplasmic reticulum [GO:0005783];endoplasmic reticulum membrane [GO:0005789];nucleolus [GO:0005730]	RNA polymerase II repressing transcription factor binding [GO:0001103];ubiquitin-like protein ligase binding [GO:0044389]	GO:0001103;GO:0005730;GO:0005737;GO:0005783;GO:0005789;GO:0008284;GO:0010628;GO:0010629;GO:0030335;GO:0032435;GO:0032436;GO:0033146;GO:0034976;GO:0043066;GO:0044389;GO:0045944;GO:0051092;GO:0051216;GO:1901800;GO:1902808;GO:1903721;GO:1905050;GO:1905552;GO:1905636;GO:1990592
MRPS27	Q92552	28S ribosomal protein S27, mitochondrial	8	24.9	47.611	55.445	2.17168	0.425723	23.27	23.1729	23.3133	23.5731	23.8918	23.6261	23.2484	23.1917	23.103	22.9683	23.1543	22.9899	22.686	cell population proliferation [GO:0008283];mitochondrial translational elongation [GO:0070125];mitochondrial translational termination [GO:0070126];positive regulation of mitochondrial translation [GO:0070131]	cytoplasm [GO:0005737];mitochondrial inner membrane [GO:0005743];mitochondrial small ribosomal subunit [GO:0005763];mitochondrion [GO:0005739]	mitochondrial ribosome binding [GO:0097177];rRNA binding [GO:0019843];tRNA binding [GO:0000049]	GO:0000049;GO:0005737;GO:0005739;GO:0005743;GO:0005763;GO:0008283;GO:0019843;GO:0070125;GO:0070126;GO:0070131;GO:0097177
MTDH	Q86UE4	Protein LYRIC	22	34	63.836	323.31	2.3322	0.425621	28.6341	28.8616	28.8201	28.8887	28.463	28.3289	28.2261	27.9305	28.3939	28.4082	28.1156	28.4985	28.1104	bicellular tight junction assembly [GO:0070830];lipopolysaccharide-mediated signaling pathway [GO:0031663];negative regulation of apoptotic process [GO:0043066];negative regulation of transcription by RNA polymerase II [GO:0000122];positive regulation of angiogenesis [GO:0045766];positive regulation of autophagy [GO:0010508];positive regulation of I-kappaB kinase/NF-kappaB signaling [GO:0043123];…	apical plasma membrane [GO:0016324];bicellular tight junction [GO:0005923];cytoplasm [GO:0005737];endoplasmic reticulum [GO:0005783];endoplasmic reticulum membrane [GO:0005789];fibrillar center [GO:0001650];integral component of membrane [GO:0016021];intercellular canaliculus [GO:0046581];nuclear body [GO:0016604];nuclear membrane [GO:0031965];nucleus [GO:0005634];perinuclear region of cytoplasm …	double-stranded RNA binding [GO:0003725];NF-kappaB binding [GO:0051059];RNA binding [GO:0003723];RNA polymerase II transcription factor binding [GO:0001085];transcription coactivator activity [GO:0003713]	GO:0000122;GO:0001085;GO:0001650;GO:0003713;GO:0003723;GO:0003725;GO:0005634;GO:0005737;GO:0005783;GO:0005789;GO:0005923;GO:0010508;GO:0016021;GO:0016324;GO:0016604;GO:0031663;GO:0031965;GO:0043066;GO:0043123;GO:0045766;GO:0046581;GO:0048471;GO:0051059;GO:0051092;GO:0051897;GO:0070830
VPS26A	O75436	Vacuolar protein sorting-associated protein 26A	12	51.4	38.169	323.31	3.20416	0.425472	27.518	27.7752	27.7448	27.4238	27.5866	27.5427	27.15	27.1577	27.2981	26.8219	27.3109	27.356	27.1168	intracellular protein transport [GO:0006886];regulation of macroautophagy [GO:0016241];retrograde transport, endosome to Golgi [GO:0042147];retrograde transport, endosome to plasma membrane [GO:1990126];Wnt signaling pathway [GO:0016055]	cytosol [GO:0005829];early endosome [GO:0005769];endosome [GO:0005768];endosome membrane [GO:0010008];lysosome [GO:0005764];retromer, cargo-selective complex [GO:0030906];retromer complex [GO:0030904];tubular endosome [GO:0097422];vesicle [GO:0031982]		GO:0005764;GO:0005768;GO:0005769;GO:0005829;GO:0006886;GO:0010008;GO:0016055;GO:0016241;GO:0030904;GO:0030906;GO:0031982;GO:0042147;GO:0097422;GO:1990126
TXNDC5	Q8NBS9	Thioredoxin domain-containing protein 5	11	39.8	47.628	323.31	2.42246	0.424297	29.4563	29.2429	29.2966	29.8773	29.7039	29.6277	29.0481	28.915	29.3786	29.0385	29.0189	29.3217	29.0479	apoptotic cell clearance [GO:0043277];cell redox homeostasis [GO:0045454];negative regulation of apoptotic process [GO:0043066];neutrophil degranulation [GO:0043312]	azurophil granule lumen [GO:0035578];endoplasmic reticulum [GO:0005783];endoplasmic reticulum lumen [GO:0005788];extracellular exosome [GO:0070062];extracellular region [GO:0005576];lysosomal lumen [GO:0043202]	isomerase activity [GO:0016853]	GO:0005576;GO:0005783;GO:0005788;GO:0016853;GO:0035578;GO:0043066;GO:0043202;GO:0043277;GO:0043312;GO:0045454;GO:0070062
PDE12	Q6L8Q7	2,5-phosphodiesterase 12	6	15.4	67.351	61.837	2.21901	0.421052	24.5582	25.3869	24.7701	24.9989	24.5995	24.7078	24.5724	24.3993	24.419	24.4167	24.2204	24.4497	24.4334	cellular response to dsRNA [GO:0071359];cellular response to interferon-alpha [GO:0035457];cellular response to interferon-gamma [GO:0071346];defense response to virus [GO:0051607];mitochondrial mRNA catabolic process [GO:0000958];mRNA processing [GO:0006397];negative regulation of cell death [GO:0060548];negative regulation of oxidative phosphorylation [GO:0090324];nuclear-transcribed mRNA catab…	cytosol [GO:0005829];mitochondrial matrix [GO:0005759];mitochondrion [GO:0005739]	3'-5'-exoribonuclease activity [GO:0000175];exonuclease activity [GO:0004527];metal ion binding [GO:0046872];oligoribonucleotidase activity [GO:0034611];poly(A)-specific ribonuclease activity [GO:0004535]	GO:0000175;GO:0000288;GO:0000958;GO:0004527;GO:0004535;GO:0005739;GO:0005759;GO:0005829;GO:0006397;GO:0034611;GO:0035457;GO:0044528;GO:0045070;GO:0046872;GO:0051607;GO:0060548;GO:0071346;GO:0071359;GO:0090305;GO:0090324;GO:0090503
RABL6	Q3YEC7	Rab-like protein 6	10	18.9	79.548	105.9	1.70423	0.420929	24.8585	24.8014	24.5493	25.1386	24.3095	24.3359	24.4878	24.0862	24.2774	24.4901	24.3464	24.1791	23.8453		centrosome [GO:0005813];cytoplasm [GO:0005737];cytosol [GO:0005829];nucleus [GO:0005634]	GTP binding [GO:0005525]	GO:0005525;GO:0005634;GO:0005737;GO:0005813;GO:0005829
UBXN4	Q92575	UBX domain-containing protein 4	5	15.2	56.777	89.137	2.34952	0.42041	25.8136	25.4159	25.5427	25.7216	25.3295	25.4572	25.0895	24.922	25.2042	25.4263	25.1378	25.3448	24.7597	response to unfolded protein [GO:0006986];ubiquitin-dependent ERAD pathway [GO:0030433]	cytosol [GO:0005829];endoplasmic reticulum [GO:0005783];endoplasmic reticulum membrane [GO:0005789];nuclear envelope [GO:0005635]		GO:0005635;GO:0005783;GO:0005789;GO:0005829;GO:0006986;GO:0030433
MAP2K5	Q13163	Dual specificity mitogen-activated protein kinase kinase 5	2	7.6	50.111	29.781	1.52404	0.418737	23.9908	23.822	23.962	NaN	23.6303	NaN	23.4505	23.3894	23.8387	23.3979	23.0862	NaN	NaN	activation of MAPK activity [GO:0000187];activation of protein kinase activity [GO:0032147];cellular response to growth factor stimulus [GO:0071363];cellular response to laminar fluid shear stress [GO:0071499];ERK5 cascade [GO:0070375];heart development [GO:0007507];negative regulation of cell migration involved in sprouting angiogenesis [GO:0090051];negative regulation of chemokine (C-X-C motif)…	cytoplasm [GO:0005737];cytosol [GO:0005829];nucleus [GO:0005634];spindle [GO:0005819]	ATP binding [GO:0005524];MAP kinase kinase activity [GO:0004708];metal ion binding [GO:0046872];protein kinase activity [GO:0004672];protein serine/threonine kinase activity [GO:0004674];protein tyrosine kinase activity [GO:0004713]	GO:0000122;GO:0000187;GO:0004672;GO:0004674;GO:0004708;GO:0004713;GO:0005524;GO:0005634;GO:0005737;GO:0005819;GO:0005829;GO:0007165;GO:0007507;GO:0023014;GO:0030307;GO:0031098;GO:0032088;GO:0032147;GO:0034115;GO:0043154;GO:0045415;GO:0045944;GO:0046872;GO:0050679;GO:0051247;GO:0060761;GO:0070375;GO:0071363;GO:0071499;GO:0090051;GO:2000342;GO:2001240
HSP90B1	P14625	Endoplasmin	50	52.7	92.468	323.31	2.79547	0.417979	32.2235	32.2534	32.2445	32.2039	31.9834	31.8654	31.7419	31.4112	31.9781	31.6981	31.7044	31.8992	31.5446	actin rod assembly [GO:0031247];ATF6-mediated unfolded protein response [GO:0036500];cellular protein metabolic process [GO:0044267];cellular response to ATP [GO:0071318];cytokine-mediated signaling pathway [GO:0019221];negative regulation of apoptotic process [GO:0043066];post-translational protein modification [GO:0043687];protein folding [GO:0006457];protein folding in endoplasmic reticulum [G…	collagen-containing extracellular matrix [GO:0062023];cytosol [GO:0005829];endocytic vesicle lumen [GO:0071682];endoplasmic reticulum [GO:0005783];endoplasmic reticulum chaperone complex [GO:0034663];endoplasmic reticulum lumen [GO:0005788];endoplasmic reticulum membrane [GO:0005789];extracellular exosome [GO:0070062];extracellular region [GO:0005576];focal adhesion [GO:0005925];melanosome [GO:00…	ATP binding [GO:0005524];calcium ion binding [GO:0005509];low-density lipoprotein particle receptor binding [GO:0050750];protein phosphatase binding [GO:0019903];RNA binding [GO:0003723];unfolded protein binding [GO:0051082]	GO:0001666;GO:0002224;GO:0003723;GO:0005509;GO:0005524;GO:0005576;GO:0005634;GO:0005783;GO:0005788;GO:0005789;GO:0005829;GO:0005886;GO:0005925;GO:0006457;GO:0006898;GO:0015031;GO:0016020;GO:0019221;GO:0019903;GO:0030433;GO:0030496;GO:0030970;GO:0031247;GO:0032991;GO:0033018;GO:0034663;GO:0034975;GO:0034976;GO:0036500;GO:0042470;GO:0043066;GO:0043666;GO:0043687;GO:0044267;GO:0048471;GO:0050750;GO:…
ETFDH	Q16134	Electron transfer flavoprotein-ubiquinone oxidoreductase, mitochondrial	6	14.4	68.495	219.26	1.33183	0.417405	24.7087	24.1084	24.0213	24.4201	24.2168	24.2288	23.5996	24.3425	NaN	23.5266	23.7371	NaN	24.1275	electron transport chain [GO:0022900];fatty acid beta-oxidation using acyl-CoA dehydrogenase [GO:0033539];respiratory electron transport chain [GO:0022904];response to oxidative stress [GO:0006979]	integral component of mitochondrial inner membrane [GO:0031305];mitochondrial matrix [GO:0005759];mitochondrial membrane [GO:0031966]	4 iron, 4 sulfur cluster binding [GO:0051539];electron transfer activity [GO:0009055];electron-transferring-flavoprotein dehydrogenase activity [GO:0004174];flavin adenine dinucleotide binding [GO:0050660];metal ion binding [GO:0046872];oxidoreductase activity [GO:0016491];oxidoreductase activity, oxidizing metal ions with flavin as acceptor [GO:0043783];quinone binding [GO:0048038];ubiquinone bi…	GO:0004174;GO:0005759;GO:0006979;GO:0009055;GO:0016491;GO:0022900;GO:0022904;GO:0031305;GO:0031966;GO:0033539;GO:0043783;GO:0046872;GO:0048038;GO:0048039;GO:0050660;GO:0051539
PRKAA1	Q13131	5-AMP-activated protein kinase catalytic subunit alpha-1	9	20.2	64.009	85.897	2.90915	0.417022	27.319	27.2884	27.4855	27.5101	27.1307	NaN	27.0363	26.9728	27.0262	27.1273	26.7112	26.7064	26.9276	activation of MAPK activity [GO:0000187];CAMKK-AMPK signaling cascade [GO:0061762];cell cycle arrest [GO:0007050];cellular response to calcium ion [GO:0071277];cellular response to ethanol [GO:0071361];cellular response to glucose starvation [GO:0042149];cellular response to glucose stimulus [GO:0071333];cellular response to hydrogen peroxide [GO:0070301];cellular response to hypoxia [GO:0071456]…	apical plasma membrane [GO:0016324];axon [GO:0030424];cytoplasm [GO:0005737];cytosol [GO:0005829];dendrite [GO:0030425];neuronal cell body [GO:0043025];nuclear speck [GO:0016607];nucleoplasm [GO:0005654];nucleotide-activated protein kinase complex [GO:0031588];nucleus [GO:0005634]	[acetyl-CoA carboxylase] kinase activity [GO:0050405];[hydroxymethylglutaryl-CoA reductase (NADPH)] kinase activity [GO:0047322];AMP-activated protein kinase activity [GO:0004679];ATP binding [GO:0005524];cAMP-dependent protein kinase activity [GO:0004691];chromatin binding [GO:0003682];histone serine kinase activity [GO:0035174];metal ion binding [GO:0046872];protein C-terminus binding [GO:00080…	GO:0000187;GO:0001666;GO:0003682;GO:0004672;GO:0004674;GO:0004679;GO:0004691;GO:0005524;GO:0005634;GO:0005654;GO:0005737;GO:0005829;GO:0006006;GO:0006468;GO:0006633;GO:0006695;GO:0007050;GO:0007165;GO:0008022;GO:0008284;GO:0008610;GO:0009411;GO:0009631;GO:0010332;GO:0010508;GO:0010628;GO:0010629;GO:0014823;GO:0016055;GO:0016236;GO:0016241;GO:0016324;GO:0016607;GO:0019395;GO:0030424;GO:0030425;GO:…
DHRS1	Q96LJ7	Dehydrogenase/reductase SDR family member 1	4	16.3	33.909	23.63	1.37192	0.415721	24.1795	24.4046	24.3729	24.3488	24.2258	24.2792	23.4237	24.0644	23.4948	NaN	24.3423	23.6149	24.3764		endoplasmic reticulum [GO:0005783]	oxidoreductase activity [GO:0016491]	GO:0005783;GO:0016491
NF1	P21359	Neurofibromin;Neurofibromin truncated	16	6.5	319.37	25.62	1.3354	0.41429	23.7705	23.4278	23.917	23.9856	23.9325	23.1332	23.4539	23.5567	23.1646	22.5993	23.4221	23.3553	23.4091	actin cytoskeleton organization [GO:0030036];adrenal gland development [GO:0030325];amygdala development [GO:0021764];artery morphogenesis [GO:0048844];brain development [GO:0007420];camera-type eye morphogenesis [GO:0048593];cell communication [GO:0007154];cellular response to heat [GO:0034605];cerebral cortex development [GO:0021987];cognition [GO:0050890];collagen fibril organization [GO:00301…	axon [GO:0030424];cytoplasm [GO:0005737];cytosol [GO:0005829];dendrite [GO:0030425];membrane [GO:0016020];nucleolus [GO:0005730];nucleus [GO:0005634];presynapse [GO:0098793]	GTPase activator activity [GO:0005096];phosphatidylcholine binding [GO:0031210];phosphatidylethanolamine binding [GO:0008429]	GO:0000165;GO:0001649;GO:0001656;GO:0001666;GO:0001889;GO:0001937;GO:0001938;GO:0001952;GO:0001953;GO:0005096;GO:0005634;GO:0005730;GO:0005737;GO:0005829;GO:0006469;GO:0007154;GO:0007265;GO:0007406;GO:0007420;GO:0007422;GO:0007507;GO:0007519;GO:0008429;GO:0008542;GO:0008625;GO:0010468;GO:0014044;GO:0014065;GO:0016020;GO:0016525;GO:0021510;GO:0021764;GO:0021897;GO:0021915;GO:0021987;GO:0022011;GO:…
MRE11A	P49959	Double-strand break repair protein MRE11A	11	21.5	80.592	16.002	1.95816	0.413196	24.5552	24.5235	24.6489	24.5828	24.0527	24.1005	23.8207	23.8766	24.18	24.1279	23.7679	24.3647	23.8442	cell population proliferation [GO:0008283];cellular response to DNA damage stimulus [GO:0006974];DNA double-strand break processing [GO:0000729];DNA duplex unwinding [GO:0032508];DNA recombination [GO:0006310];DNA repair [GO:0006281];DNA replication [GO:0006260];DNA strand resection involved in replication fork processing [GO:0110025];double-strand break repair [GO:0006302];double-strand break re…	cytoplasm [GO:0005737];cytosol [GO:0005829];Mre11 complex [GO:0030870];nuclear chromosome, telomeric region [GO:0000784];nucleoplasm [GO:0005654];nucleus [GO:0005634];PML body [GO:0016605];replication fork [GO:0005657];site of double-strand break [GO:0035861]	3'-5'-exodeoxyribonuclease activity [GO:0008296];3'-5' exonuclease activity [GO:0008408];5'-3' exonuclease activity [GO:0008409];cadherin binding [GO:0045296];double-stranded DNA binding [GO:0003690];endodeoxyribonuclease activity [GO:0004520];identical protein binding [GO:0042802];manganese ion binding [GO:0030145];nuclease activity [GO:0004518];protein C-terminus binding [GO:0008022];single-str…	GO:0000014;GO:0000019;GO:0000723;GO:0000724;GO:0000729;GO:0000784;GO:0003690;GO:0004518;GO:0004520;GO:0005634;GO:0005654;GO:0005657;GO:0005737;GO:0005829;GO:0006260;GO:0006281;GO:0006302;GO:0006303;GO:0006310;GO:0006974;GO:0007004;GO:0007062;GO:0007095;GO:0007129;GO:0007131;GO:0008022;GO:0008283;GO:0008296;GO:0008408;GO:0008409;GO:0016032;GO:0016605;GO:0030145;GO:0030870;GO:0031573;GO:0031860;GO:…
GNL1	P36915	Guanine nucleotide-binding protein-like 1	11	23.7	68.66	57.536	4.3607	0.410547	25.6806	25.8969	25.7301	25.8142	25.6384	25.6249	25.3996	25.0859	25.3357	25.3899	25.2847	25.4483	25.298	cellular response to DNA damage stimulus [GO:0006974];signal transduction [GO:0007165];T cell mediated immunity [GO:0002456]	extracellular space [GO:0005615];nucleus [GO:0005634]	GTP binding [GO:0005525];structural molecule activity [GO:0005198]	GO:0002456;GO:0005198;GO:0005525;GO:0005615;GO:0005634;GO:0006974;GO:0007165
VPS4B	O75351	Vacuolar protein sorting-associated protein 4B	9	27.5	49.301	249.44	1.43119	0.408494	26.597	26.5253	26.2944	26.679	26.3344	27.0882	25.9246	26.3913	26.4378	26.306	25.613	26.5156	26.0571	cholesterol transport [GO:0030301];endosomal transport [GO:0016197];endosome to lysosome transport via multivesicular body sorting pathway [GO:0032510];ESCRT III complex disassembly [GO:1904903];late endosomal microautophagy [GO:0061738];macroautophagy [GO:0016236];midbody abscission [GO:0061952];mitotic metaphase plate congression [GO:0007080];multivesicular body assembly [GO:0036258];negative r…	centrosome [GO:0005813];cytoplasm [GO:0005737];cytosol [GO:0005829];endosome [GO:0005768];endosome membrane [GO:0010008];extracellular exosome [GO:0070062];Flemming body [GO:0090543];late endosome membrane [GO:0031902];nucleus [GO:0005634];spindle pole [GO:0000922]	ATPase activity [GO:0016887];ATPase activity, coupled [GO:0042623];ATP binding [GO:0005524];identical protein binding [GO:0042802];protein C-terminus binding [GO:0008022];protein homodimerization activity [GO:0042803]	GO:0000922;GO:0005524;GO:0005634;GO:0005737;GO:0005768;GO:0005813;GO:0005829;GO:0006813;GO:0006997;GO:0007033;GO:0007080;GO:0008022;GO:0010008;GO:0010824;GO:0010971;GO:0015031;GO:0016197;GO:0016236;GO:0016887;GO:0019058;GO:0019076;GO:0030301;GO:0031902;GO:0032510;GO:0033993;GO:0036258;GO:0039702;GO:0042623;GO:0042802;GO:0042803;GO:0043162;GO:0048524;GO:0050792;GO:0051261;GO:0060548;GO:0061738;GO:…
WDR26	Q9H7D7	WD repeat-containing protein 26	5	8.5	72.123	5.3116	2.45292	0.408194	24.0749	24.3693	24.3764	24.5641	24.0491	24.1984	23.873	24.1483	23.9741	23.6222	23.6147	23.9978	23.8168		cytoplasm [GO:0005737];cytosol [GO:0005829];mitochondrion [GO:0005739];nucleoplasm [GO:0005654];nucleus [GO:0005634];ubiquitin ligase complex [GO:0000151]		GO:0000151;GO:0005634;GO:0005654;GO:0005737;GO:0005739;GO:0005829
RAB2A	P61019	Ras-related protein Rab-2A	11	65.6	23.545	323.31	2.15608	0.407665	28.2517	28.3316	28.3734	28.4122	28.6164	27.8473	27.956	27.836	28.0211	28.0359	27.9638	27.9759	27.4956	endoplasmic reticulum to Golgi vesicle-mediated transport [GO:0006888];Golgi organization [GO:0007030];intracellular protein transport [GO:0006886];post-translational protein modification [GO:0043687];Rab protein signal transduction [GO:0032482]	cytosol [GO:0005829];endoplasmic reticulum-Golgi intermediate compartment membrane [GO:0033116];endoplasmic reticulum membrane [GO:0005789];extracellular exosome [GO:0070062];Golgi apparatus [GO:0005794];Golgi membrane [GO:0000139];lysosomal membrane [GO:0005765];melanosome [GO:0042470];nucleus [GO:0005634]	GDP binding [GO:0019003];GTPase activity [GO:0003924];GTP binding [GO:0005525]	GO:0000139;GO:0003924;GO:0005525;GO:0005634;GO:0005765;GO:0005789;GO:0005794;GO:0005829;GO:0006886;GO:0006888;GO:0007030;GO:0019003;GO:0032482;GO:0033116;GO:0042470;GO:0043687;GO:0070062
ANO6	Q4KMQ2	Anoctamin-6	4	6.9	106.16	34.822	1.53384	0.407471	23.8644	24.0678	24.0292	NaN	24.2911	23.9686	23.1635	23.6995	23.9638	23.9841	23.2153	23.7603	23.6707	activation of blood coagulation via clotting cascade [GO:0002543];bleb assembly [GO:0032060];blood coagulation [GO:0007596];bone mineralization involved in bone maturation [GO:0035630];calcium activated galactosylceramide scrambling [GO:0061591];calcium activated phosphatidylcholine scrambling [GO:0061590];calcium activated phosphatidylserine scrambling [GO:0061589];calcium ion transmembrane tran…	cell surface [GO:0009986];chloride channel complex [GO:0034707];cytosol [GO:0005829];extracellular exosome [GO:0070062];integral component of plasma membrane [GO:0005887];membrane [GO:0016020];plasma membrane [GO:0005886];specific granule membrane [GO:0035579];tertiary granule membrane [GO:0070821]	calcium activated cation channel activity [GO:0005227];intracellular calcium activated chloride channel activity [GO:0005229];phospholipid scramblase activity [GO:0017128];protein homodimerization activity [GO:0042803];voltage-gated chloride channel activity [GO:0005247];voltage-gated ion channel activity [GO:0005244]	GO:0002407;GO:0002543;GO:0005227;GO:0005229;GO:0005244;GO:0005247;GO:0005829;GO:0005886;GO:0005887;GO:0006812;GO:0006821;GO:0007596;GO:0009986;GO:0016020;GO:0017121;GO:0017128;GO:0030501;GO:0032060;GO:0034220;GO:0034707;GO:0034767;GO:0035579;GO:0035590;GO:0035630;GO:0035725;GO:0042803;GO:0043065;GO:0043312;GO:0045794;GO:0046931;GO:0060100;GO:0061589;GO:0061590;GO:0061591;GO:0070062;GO:0070588;GO:…
SNX1	Q13596	Sorting nexin-1	15	37.2	59.069	282.96	2.31088	0.405014	28.1576	28.1864	28.3622	28.258	27.9084	28.174	27.749	27.5177	27.942	27.8373	27.8594	28.0952	27.3853	early endosome to Golgi transport [GO:0034498];intracellular protein transport [GO:0006886];lamellipodium morphogenesis [GO:0072673];positive regulation of protein catabolic process [GO:0045732];receptor internalization [GO:0031623];retrograde transport, endosome to Golgi [GO:0042147]	cytoplasm [GO:0005737];cytosol [GO:0005829];early endosome membrane [GO:0031901];endosome [GO:0005768];endosome membrane [GO:0010008];Golgi apparatus [GO:0005794];intracellular membrane-bounded organelle [GO:0043231];lamellipodium [GO:0030027];lysosome [GO:0005764];membrane [GO:0016020];protein-containing complex [GO:0032991];retromer, tubulation complex [GO:0030905];retromer complex [GO:0030904]…	cadherin binding [GO:0045296];epidermal growth factor receptor binding [GO:0005154];identical protein binding [GO:0042802];insulin receptor binding [GO:0005158];leptin receptor binding [GO:1990460];phosphatidylinositol binding [GO:0035091];protein heterodimerization activity [GO:0046982];protein homodimerization activity [GO:0042803];transferrin receptor binding [GO:1990459]	GO:0005154;GO:0005158;GO:0005737;GO:0005764;GO:0005768;GO:0005794;GO:0005829;GO:0006886;GO:0010008;GO:0016020;GO:0030027;GO:0030904;GO:0030905;GO:0031623;GO:0031901;GO:0031982;GO:0032991;GO:0034498;GO:0035091;GO:0042147;GO:0042802;GO:0042803;GO:0043231;GO:0045296;GO:0045732;GO:0046982;GO:0072673;GO:1990459;GO:1990460
SEC24C	P53992	Protein transport protein Sec24C	22	23.6	118.32	53.385	2.32082	0.402407	26.6779	26.5933	26.8896	26.7229	26.4014	26.2179	26.3589	26.3411	26.1706	25.8717	26.0715	26.1764	26.2799	antigen processing and presentation of exogenous peptide antigen via MHC class II [GO:0019886];antigen processing and presentation of peptide antigen via MHC class I [GO:0002474];COPII-coated vesicle cargo loading [GO:0090110];COPII vesicle coating [GO:0048208];endoplasmic reticulum to Golgi vesicle-mediated transport [GO:0006888];intracellular protein transport [GO:0006886]	COPII vesicle coat [GO:0030127];cytosol [GO:0005829];endoplasmic reticulum membrane [GO:0005789];ER to Golgi transport vesicle membrane [GO:0012507];Golgi membrane [GO:0000139]	SNARE binding [GO:0000149];zinc ion binding [GO:0008270]	GO:0000139;GO:0000149;GO:0002474;GO:0005789;GO:0005829;GO:0006886;GO:0006888;GO:0008270;GO:0012507;GO:0019886;GO:0030127;GO:0048208;GO:0090110
GAK	O14976	Cyclin-G-associated kinase	11	12.4	143.19	55.474	2.00384	0.401071	24.5765	24.7459	24.9423	25.1861	24.6599	24.7337	24.7686	24.2911	24.4664	24.3158	23.9947	24.498	24.5097	cell cycle [GO:0007049];chaperone cofactor-dependent protein refolding [GO:0051085];clathrin coat disassembly [GO:0072318];clathrin-coated pit assembly [GO:1905224];clathrin-dependent endocytosis [GO:0072583];endoplasmic reticulum organization [GO:0007029];Golgi organization [GO:0007030];Golgi to lysosome transport [GO:0090160];membrane organization [GO:0061024];negative regulation of neuron proj…	cytoplasm [GO:0005737];cytosol [GO:0005829];focal adhesion [GO:0005925];Golgi apparatus [GO:0005794];intracellular membrane-bounded organelle [GO:0043231];membrane [GO:0016020];perinuclear region of cytoplasm [GO:0048471];presynapse [GO:0098793];vesicle [GO:0031982]	ATP binding [GO:0005524];chaperone binding [GO:0051087];clathrin binding [GO:0030276];cyclin binding [GO:0030332];protein serine/threonine kinase activity [GO:0004674]	GO:0004674;GO:0005524;GO:0005737;GO:0005794;GO:0005829;GO:0005925;GO:0006898;GO:0007029;GO:0007030;GO:0007049;GO:0010977;GO:0016020;GO:0016191;GO:0030276;GO:0030332;GO:0031982;GO:0034067;GO:0043231;GO:0048471;GO:0051085;GO:0051087;GO:0061024;GO:0072318;GO:0072583;GO:0072659;GO:0090160;GO:0098793;GO:1905224
KANK2	Q63ZY3	KN motif and ankyrin repeat domain-containing protein 2	28	45	91.173	323.31	1.61085	0.4004	26.7453	26.7533	26.7366	26.4655	26.3239	26.3497	25.9094	26.463	26.2357	26.1786	25.6897	26.021	26.6364	apoptotic process [GO:0006915];glomerular visceral epithelial cell migration [GO:0090521];kidney epithelium development [GO:0072073];negative regulation of cell population proliferation [GO:0008285];negative regulation of G1/S transition of mitotic cell cycle [GO:2000134];negative regulation of intracellular estrogen receptor signaling pathway [GO:0033147];negative regulation of programmed cell d…	cytoplasm [GO:0005737];mitochondrion [GO:0005739]		GO:0000122;GO:0005737;GO:0005739;GO:0006915;GO:0008285;GO:0033147;GO:0035023;GO:0043069;GO:0070563;GO:0072073;GO:0090521;GO:2000134
STRIP1	Q5VSL9	Striatin-interacting protein 1	9	14.6	95.575	29.461	3.24289	0.400265	24.245	24.2101	24.2747	24.0245	24.1151	24.197	23.9299	23.4615	24.0372	23.7746	23.6913	23.7088	23.8387	cortical actin cytoskeleton organization [GO:0030866];regulation of cell morphogenesis [GO:0022604]	cytosol [GO:0005829];extracellular exosome [GO:0070062];nucleus [GO:0005634]	protein kinase binding [GO:0019901];Rho GTPase binding [GO:0017048]	GO:0005634;GO:0005829;GO:0017048;GO:0019901;GO:0022604;GO:0030866;GO:0070062
APPL1	Q9UKG1	DCC-interacting protein 13-alpha	11	26.1	79.663	323.31	2.3912	0.40005	25.3751	25.2788	25.6674	25.1337	25.1556	25.3428	24.7505	24.5998	24.9592	24.899	25.111	25.1965	24.9626	adiponectin-activated signaling pathway [GO:0033211];cell cycle [GO:0007049];cell population proliferation [GO:0008283];cellular response to hepatocyte growth factor stimulus [GO:0035729];extrinsic apoptotic signaling pathway in absence of ligand [GO:0097192];insulin receptor signaling pathway [GO:0008286];negative regulation of Fc-gamma receptor signaling pathway involved in phagocytosis [GO:190…	cytoplasm [GO:0005737];cytoplasmic vesicle [GO:0031410];cytosol [GO:0005829];early endosome [GO:0005769];early endosome membrane [GO:0031901];early phagosome [GO:0032009];endosome [GO:0005768];endosome membrane [GO:0010008];extracellular exosome [GO:0070062];intracellular vesicle [GO:0097708];macropinosome [GO:0044354];membrane [GO:0016020];nucleus [GO:0005634];plasma membrane [GO:0005886];ruffle…	beta-tubulin binding [GO:0048487];identical protein binding [GO:0042802];phosphatidylinositol binding [GO:0035091];phosphatidylserine binding [GO:0001786];protein-containing complex binding [GO:0044877];protein homodimerization activity [GO:0042803];protein kinase B binding [GO:0043422]	GO:0001726;GO:0001786;GO:0005634;GO:0005737;GO:0005768;GO:0005769;GO:0005829;GO:0005886;GO:0006606;GO:0007049;GO:0007165;GO:0007179;GO:0008283;GO:0008286;GO:0010008;GO:0010762;GO:0012506;GO:0016020;GO:0023052;GO:0031410;GO:0031901;GO:0032009;GO:0033211;GO:0034143;GO:0035091;GO:0035729;GO:0042802;GO:0042803;GO:0043422;GO:0044354;GO:0044877;GO:0045088;GO:0046324;GO:0046326;GO:0048023;GO:0048487;GO:…
SAMD4B	Q5PRF9	Protein Smaug homolog 2	4	12	75.483	85.562	1.54999	0.396004	24.3081	24.0412	24.1379	24.1307	24.0532	24.041	23.7573	23.3935	24.4085	23.4895	23.7233	23.9382	23.3484	negative regulation of translation [GO:0017148];nuclear-transcribed mRNA poly(A) tail shortening [GO:0000289];regulation of mRNA stability [GO:0043488]	cytosol [GO:0005829];nucleus [GO:0005634];P-body [GO:0000932]	mRNA binding [GO:0003729];RNA binding [GO:0003723];translation repressor activity [GO:0030371]	GO:0000289;GO:0000932;GO:0003723;GO:0003729;GO:0005634;GO:0005829;GO:0017148;GO:0030371;GO:0043488
PI4K2A	Q9BTU6	Phosphatidylinositol 4-kinase type 2-alpha	11	30.1	54.022	56.592	1.8813	0.392358	24.5527	24.2836	24.6063	24.692	24.2428	24.3292	24.157	23.7472	23.9608	24.5172	24.1068	23.7366	24.1858	endosome organization [GO:0007032];Golgi organization [GO:0007030];phosphatidylinositol biosynthetic process [GO:0006661];phosphatidylinositol phosphorylation [GO:0046854]	cell junction [GO:0030054];cytoplasmic vesicle [GO:0031410];cytosol [GO:0005829];dendrite [GO:0030425];endosome [GO:0005768];growing cell tip [GO:0035838];host cell presynaptic membrane [GO:0044231];integral component of plasma membrane [GO:0005887];intrinsic component of membrane [GO:0031224];lysosomal membrane [GO:0005765];membrane [GO:0016020];membrane raft [GO:0045121];mitochondrion [GO:00057…	1-phosphatidylinositol 4-kinase activity [GO:0004430];AP-3 adaptor complex binding [GO:0035651];ATP binding [GO:0005524];magnesium ion binding [GO:0000287]	GO:0000287;GO:0004430;GO:0005524;GO:0005739;GO:0005765;GO:0005768;GO:0005802;GO:0005829;GO:0005886;GO:0005887;GO:0006661;GO:0007030;GO:0007032;GO:0016020;GO:0030054;GO:0030425;GO:0031224;GO:0031410;GO:0035651;GO:0035838;GO:0042734;GO:0043005;GO:0043025;GO:0044231;GO:0045121;GO:0046854
PREPL	Q4J6C6	Prolyl endopeptidase-like	3	6.9	83.926	5.5916	1.85812	0.391506	23.7561	23.7126	23.7575	23.5886	24.4363	23.8167	23.713	23.3306	23.1599	23.5115	23.5713	23.4764	23.4091	Golgi to plasma membrane protein transport [GO:0043001];regulation of synaptic vesicle exocytosis [GO:2000300];retrograde transport, endosome to Golgi [GO:0042147]	cytoskeleton [GO:0005856];cytosol [GO:0005829];Golgi apparatus [GO:0005794];trans-Golgi network [GO:0005802]	peptidase activity [GO:0008233];serine-type endopeptidase activity [GO:0004252];serine-type exopeptidase activity [GO:0070008]	GO:0004252;GO:0005794;GO:0005802;GO:0005829;GO:0005856;GO:0008233;GO:0042147;GO:0043001;GO:0070008;GO:2000300
COPE	O14579	Coatomer subunit epsilon	12	49.4	34.482	225.22	1.40256	0.391034	28.4811	29.3599	28.8515	28.3602	28.4954	28.5839	28.4269	28.2302	28.1393	28.0005	28.2407	28.725	28.3209	endoplasmic reticulum to Golgi vesicle-mediated transport [GO:0006888];intra-Golgi vesicle-mediated transport [GO:0006891];protein transport [GO:0015031];retrograde vesicle-mediated transport, Golgi to endoplasmic reticulum [GO:0006890]	COPI vesicle coat [GO:0030126];cytosol [GO:0005829];endoplasmic reticulum membrane [GO:0005789];Golgi apparatus [GO:0005794];Golgi membrane [GO:0000139];nucleoplasm [GO:0005654];transport vesicle [GO:0030133]	structural molecule activity [GO:0005198]	GO:0000139;GO:0005198;GO:0005654;GO:0005789;GO:0005794;GO:0005829;GO:0006888;GO:0006890;GO:0006891;GO:0015031;GO:0030126;GO:0030133
HNRNPA2B1	P22626	Heterogeneous nuclear ribonucleoproteins A2/B1	12	43.6	37.429	222.02	1.68727	0.390514	28.1907	28.0515	28.1936	28.573	28.3982	28.5122	27.9519	27.6742	28.0381	28.1092	27.5701	28.4311	27.731	G-quadruplex DNA unwinding [GO:0044806];interleukin-12-mediated signaling pathway [GO:0035722];miRNA transport [GO:1990428];mRNA export from nucleus [GO:0006406];mRNA processing [GO:0006397];mRNA splicing, via spliceosome [GO:0000398];negative regulation of mRNA splicing, via spliceosome [GO:0048025];negative regulation of transcription by RNA polymerase II [GO:0000122];positive regulation of tel…	Cajal body [GO:0015030];catalytic step 2 spliceosome [GO:0071013];chromosome, telomeric region [GO:0000781];cytoplasm [GO:0005737];extracellular exosome [GO:0070062];membrane [GO:0016020];nuclear matrix [GO:0016363];nucleoplasm [GO:0005654];nucleus [GO:0005634];ribonucleoprotein complex [GO:1990904];spliceosomal complex [GO:0005681]	G-rich strand telomeric DNA binding [GO:0098505];identical protein binding [GO:0042802];miRNA binding [GO:0035198];mRNA 3'-UTR binding [GO:0003730];mRNA binding [GO:0003729];N6-methyladenosine-containing RNA binding [GO:1990247];pre-mRNA intronic binding [GO:0097157];RNA binding [GO:0003723];single-stranded telomeric DNA binding [GO:0043047]	GO:0000122;GO:0000398;GO:0000781;GO:0003723;GO:0003729;GO:0003730;GO:0005634;GO:0005654;GO:0005681;GO:0005737;GO:0006397;GO:0006406;GO:0015030;GO:0016020;GO:0016070;GO:0016363;GO:0031053;GO:0035198;GO:0035722;GO:0042802;GO:0043047;GO:0044806;GO:0048025;GO:0050658;GO:0070062;GO:0071013;GO:0097157;GO:0098505;GO:1904358;GO:1905663;GO:1990247;GO:1990428;GO:1990904
NUP54	Q7Z3B4	Nucleoporin p54	6	15.8	55.435	69.692	1.74459	0.389004	24.2581	24.2819	24.6415	24.4137	24.3979	23.9841	24.3262	23.9578	23.933	23.913	24.0832	23.969	23.4015	intracellular transport of virus [GO:0075733];mRNA export from nucleus [GO:0006406];NLS-bearing protein import into nucleus [GO:0006607];nuclear pore organization [GO:0006999];protein heterotetramerization [GO:0051290];protein heterotrimerization [GO:0070208];protein homooligomerization [GO:0051260];protein localization to nuclear inner membrane [GO:0036228];protein sumoylation [GO:0016925];prote…	host cell [GO:0043657];nuclear envelope [GO:0005635];nuclear membrane [GO:0031965];nuclear pore central transport channel [GO:0044613]	structural constituent of nuclear pore [GO:0017056]	GO:0005635;GO:0006110;GO:0006406;GO:0006409;GO:0006605;GO:0006607;GO:0006999;GO:0016032;GO:0016925;GO:0017056;GO:0019083;GO:0031965;GO:0036228;GO:0042306;GO:0043657;GO:0044613;GO:0051260;GO:0051290;GO:0060964;GO:0070208;GO:0075733;GO:1900034
EPN1	Q9Y6I3	Epsin-1	10	25.7	60.293	280.15	1.64324	0.388299	25.0522	25.5716	25.5285	25.9272	25.5583	25.4647	25.4141	24.9271	24.895	25.3462	24.9445	25.4201	24.9542	embryonic organ development [GO:0048568];endocytosis [GO:0006897];female pregnancy [GO:0007565];in utero embryonic development [GO:0001701];membrane organization [GO:0061024];negative regulation of epidermal growth factor receptor signaling pathway [GO:0042059];negative regulation of sprouting angiogenesis [GO:1903671];Notch signaling pathway [GO:0007219]	clathrin-coated pit [GO:0005905];cytosol [GO:0005829];nucleus [GO:0005634];plasma membrane [GO:0005886]	lipid binding [GO:0008289]	GO:0001701;GO:0005634;GO:0005829;GO:0005886;GO:0005905;GO:0006897;GO:0007219;GO:0007565;GO:0008289;GO:0042059;GO:0048568;GO:0061024;GO:1903671
DLG1	Q12959	Disks large homolog 1	11	17.9	100.45	180.49	1.80384	0.38468	24.5118	24.6764	24.5006	24.482	24.5523	24.0585	23.8964	24.0067	24.2943	24.4026	24.1165	24.2195	23.6165	actin filament organization [GO:0007015];activation of protein kinase activity [GO:0032147];amyloid precursor protein metabolic process [GO:0042982];astral microtubule organization [GO:0030953];bicellular tight junction assembly [GO:0070830];branching involved in ureteric bud morphogenesis [GO:0001658];cell-cell adhesion [GO:0098609];cellular protein-containing complex localization [GO:0034629];c…	apical plasma membrane [GO:0016324];basement membrane [GO:0005604];basolateral plasma membrane [GO:0016323];bicellular tight junction [GO:0005923];cell-cell junction [GO:0005911];cell junction [GO:0030054];cell projection membrane [GO:0031253];cytoplasm [GO:0005737];cytoplasmic side of plasma membrane [GO:0009898];cytosol [GO:0005829];endoplasmic reticulum [GO:0005783];endoplasmic reticulum membr…	cadherin binding [GO:0045296];cytoskeletal protein binding [GO:0008092];guanylate kinase activity [GO:0004385];ion channel binding [GO:0044325];ionotropic glutamate receptor binding [GO:0035255];L27 domain binding [GO:0097016];mitogen-activated protein kinase kinase binding [GO:0031434];molecular adaptor activity [GO:0060090];phosphatase binding [GO:0019902];phosphoprotein phosphatase activity [G…	GO:0000122;GO:0000165;GO:0001658;GO:0001771;GO:0001772;GO:0001935;GO:0002088;GO:0002369;GO:0004385;GO:0004721;GO:0005604;GO:0005634;GO:0005737;GO:0005783;GO:0005789;GO:0005794;GO:0005829;GO:0005874;GO:0005886;GO:0005911;GO:0005923;GO:0007015;GO:0007093;GO:0007163;GO:0007268;GO:0008022;GO:0008092;GO:0008284;GO:0008360;GO:0009898;GO:0014704;GO:0015459;GO:0016032;GO:0016323;GO:0016324;GO:0016328;GO:…
ILVBL	A1L0T0	Acetolactate synthase-like protein	6	16.3	67.867	75.082	2.28298	0.381772	25.6407	25.72	25.728	25.7427	25.6695	25.4171	25.6991	25.035	25.243	25.5097	25.0872	25.1857	25.139		integral component of membrane [GO:0016021];membrane [GO:0016020]	magnesium ion binding [GO:0000287];thiamine pyrophosphate binding [GO:0030976];transferase activity [GO:0016740]	GO:0000287;GO:0016020;GO:0016021;GO:0016740;GO:0030976
NCKAP1	Q9Y2A7	Nck-associated protein 1	24	25.4	128.79	73.919	2.4681	0.378551	26.0656	25.8806	26.2075	25.9986	26.4024	26.0098	25.8658	25.7681	25.8278	25.4583	25.4552	25.8707	25.7627	apoptotic process [GO:0006915];cell migration [GO:0016477];cell morphogenesis [GO:0000902];cell projection assembly [GO:0030031];central nervous system development [GO:0007417];cortical actin cytoskeleton organization [GO:0030866];Fc-gamma receptor signaling pathway involved in phagocytosis [GO:0038096];neuron projection morphogenesis [GO:0048812];positive regulation of actin filament polymerizat…	cytosol [GO:0005829];extracellular exosome [GO:0070062];filamentous actin [GO:0031941];focal adhesion [GO:0005925];integral component of membrane [GO:0016021];lamellipodium [GO:0030027];lamellipodium membrane [GO:0031258];ruffle [GO:0001726];SCAR complex [GO:0031209]		GO:0000902;GO:0001726;GO:0005829;GO:0005925;GO:0006915;GO:0007417;GO:0010592;GO:0016021;GO:0016032;GO:0016477;GO:0016601;GO:0030027;GO:0030031;GO:0030838;GO:0030866;GO:0031209;GO:0031258;GO:0031941;GO:0038096;GO:0048010;GO:0048812;GO:0070062;GO:2000601
SAE1	Q9UBE0	SUMO-activating enzyme subunit 1;SUMO-activating enzyme subunit 1, N-terminally processed	11	35	38.449	323.31	1.35056	0.378236	25.774	25.6674	25.8951	26.4765	25.8795	26.1606	25.513	26.0379	25.5094	25.7129	25.7314	25.039	25.6376	positive regulation of protein targeting to mitochondrion [GO:1903955];protein modification by small protein conjugation [GO:0032446];protein sumoylation [GO:0016925];protein ubiquitination [GO:0016567]	cytoplasm [GO:0005737];nucleoplasm [GO:0005654];nucleus [GO:0005634];SUMO activating enzyme complex [GO:0031510]	ATP-dependent protein binding [GO:0043008];enzyme activator activity [GO:0008047];protein C-terminus binding [GO:0008022];protein heterodimerization activity [GO:0046982];small protein activating enzyme binding [GO:0044388];SUMO activating enzyme activity [GO:0019948];ubiquitin activating enzyme activity [GO:0004839]	GO:0004839;GO:0005634;GO:0005654;GO:0005737;GO:0008022;GO:0008047;GO:0016567;GO:0016925;GO:0019948;GO:0031510;GO:0032446;GO:0043008;GO:0044388;GO:0046982;GO:1903955
XPO7	Q9UIA9	Exportin-7	17	19.8	123.91	115.36	2.06869	0.377884	24.4026	24.6435	24.7994	25.1946	24.9526	24.9246	24.3032	24.2207	24.4232	24.5124	24.4698	24.5121	24.6502	mRNA transport [GO:0051028];protein export from nucleus [GO:0006611]	cytoplasm [GO:0005737];nuclear pore [GO:0005643];nucleus [GO:0005634]	nuclear export signal receptor activity [GO:0005049];Ran GTPase binding [GO:0008536]	GO:0005049;GO:0005634;GO:0005643;GO:0005737;GO:0006611;GO:0008536;GO:0051028
PEX5	P50542	Peroxisomal targeting signal 1 receptor	7	16.1	70.864	96.36	1.69971	0.377124	23.2325	NaN	23.4329	23.1905	23.0378	22.9583	22.4066	22.5919	22.618	22.9723	22.9809	23.1335	22.8497	negative regulation of protein homotetramerization [GO:1901094];protein import into peroxisome matrix [GO:0016558];protein import into peroxisome matrix, docking [GO:0016560];protein import into peroxisome matrix, translocation [GO:0016561];protein import into peroxisome membrane [GO:0045046];protein targeting to peroxisome [GO:0006625];protein tetramerization [GO:0051262];protein ubiquitination …	cell [GO:0005623];cytoplasm [GO:0005737];cytosol [GO:0005829];Golgi apparatus [GO:0005794];membrane [GO:0016020];peroxisomal matrix [GO:0005782];peroxisomal membrane [GO:0005778];peroxisome [GO:0005777];protein-containing complex [GO:0032991]	enzyme binding [GO:0019899];peroxisome matrix targeting signal-1 binding [GO:0005052];peroxisome targeting sequence binding [GO:0000268];protein C-terminus binding [GO:0008022];protein N-terminus binding [GO:0047485];small GTPase binding [GO:0031267]	GO:0000268;GO:0005052;GO:0005623;GO:0005737;GO:0005777;GO:0005778;GO:0005782;GO:0005794;GO:0005829;GO:0006625;GO:0008022;GO:0016020;GO:0016558;GO:0016560;GO:0016561;GO:0016567;GO:0019899;GO:0031267;GO:0032991;GO:0045046;GO:0047485;GO:0051262;GO:1901094
	Q6ZSR9	Uncharacterized protein FLJ45252	8	35.2	37.976	237.16	1.98316	0.376249	24.7054	24.9383	25.1076	25.2724	24.7882	24.7292	24.7639	24.116	24.6426	24.6063	24.4478	24.6013	24.6528
MKL2	Q9ULH7	MKL/myocardin-like protein 2	6	11.3	118.13	84.496	1.38433	0.374286	23.9081	23.8615	23.6205	23.5526	23.2664	23.2129	23.3073	22.7761	23.403	23.4917	22.8464	23.4435	23.1044	muscle organ development [GO:0007517];positive regulation of striated muscle tissue development [GO:0045844];positive regulation of transcription by RNA polymerase II [GO:0045944];smooth muscle cell differentiation [GO:0051145]	nucleus [GO:0005634]	cadherin binding [GO:0045296];transcription coactivator activity [GO:0003713]	GO:0003713;GO:0005634;GO:0007517;GO:0045296;GO:0045844;GO:0045944;GO:0051145
VPS29	Q9UBQ0	Vacuolar protein sorting-associated protein 29	6	33.5	20.505	124.91	2.0388	0.374057	27.8577	27.493	27.753	27.3436	27.5617	27.164	27.1672	26.9769	27.4158	26.954	27.0584	27.2813	27.2299	endocytic recycling [GO:0032456];intracellular protein transport [GO:0006886];retrograde transport, endosome to Golgi [GO:0042147];retrograde transport, endosome to plasma membrane [GO:1990126];viral process [GO:0016032];Wnt signaling pathway [GO:0016055]	cytosol [GO:0005829];early endosome [GO:0005769];endosome [GO:0005768];endosome membrane [GO:0010008];intracellular membrane-bounded organelle [GO:0043231];late endosome [GO:0005770];retromer, cargo-selective complex [GO:0030906];retromer complex [GO:0030904]	metal ion binding [GO:0046872]	GO:0005768;GO:0005769;GO:0005770;GO:0005829;GO:0006886;GO:0010008;GO:0016032;GO:0016055;GO:0030904;GO:0030906;GO:0032456;GO:0042147;GO:0043231;GO:0046872;GO:1990126
AAMP	Q13685	Angio-associated migratory cell protein	3	9	46.75	87.963	1.57396	0.373819	24.0193	23.9259	24.1972	24.4175	23.8324	23.9271	23.7494	23.2103	23.9384	23.5612	23.5641	24.1261	23.6065	angiogenesis [GO:0001525];cell differentiation [GO:0030154];positive regulation of endothelial cell migration [GO:0010595];ribosomal large subunit biogenesis [GO:0042273];smooth muscle cell migration [GO:0014909]	cell surface [GO:0009986];cytosol [GO:0005829];intercellular bridge [GO:0045171];microtubule cytoskeleton [GO:0015630];plasma membrane [GO:0005886]	heparin binding [GO:0008201];unfolded protein binding [GO:0051082]	GO:0001525;GO:0005829;GO:0005886;GO:0008201;GO:0009986;GO:0010595;GO:0014909;GO:0015630;GO:0030154;GO:0042273;GO:0045171;GO:0051082
NAE1	Q13564	NEDD8-activating enzyme E1 regulatory subunit	10	25.1	60.246	288.29	2.43893	0.373372	26.5198	26.5961	26.488	26.3352	26.4659	26.3295	26.1329	25.6632	26.2776	26.2177	25.9937	26.3193	25.972	mitotic DNA replication checkpoint [GO:0033314];neuron apoptotic process [GO:0051402];post-translational protein modification [GO:0043687];protein modification by small protein conjugation [GO:0032446];protein neddylation [GO:0045116];regulation of apoptotic process [GO:0042981];regulation of neuron apoptotic process [GO:0043523];signal transduction [GO:0007165]	cytoplasm [GO:0005737];cytosol [GO:0005829];plasma membrane [GO:0005886];protein-containing complex [GO:0032991]	NEDD8 activating enzyme activity [GO:0019781];protein heterodimerization activity [GO:0046982];ubiquitin protein ligase binding [GO:0031625]	GO:0005737;GO:0005829;GO:0005886;GO:0007165;GO:0019781;GO:0031625;GO:0032446;GO:0032991;GO:0033314;GO:0042981;GO:0043523;GO:0043687;GO:0045116;GO:0046982;GO:0051402
EIF4G3	O43432	Eukaryotic translation initiation factor 4 gamma 3	28	20	176.65	91.184	2.25238	0.37242	25.085	25.1464	25.1391	25.4779	25.37	25.5058	25.2032	24.834	24.9124	24.658	24.7094	25.1258	24.9616	regulation of translational initiation [GO:0006446]	cytosol [GO:0005829];eukaryotic translation initiation factor 4F complex [GO:0016281]	mRNA binding [GO:0003729];RNA binding [GO:0003723];RNA cap binding [GO:0000339];translation factor activity, RNA binding [GO:0008135];translation initiation factor activity [GO:0003743]	GO:0000339;GO:0003723;GO:0003729;GO:0003743;GO:0005829;GO:0006446;GO:0008135;GO:0016281
YIPF5	Q969M3	Protein YIPF5	3	22.2	27.989	26.174	1.47649	0.368513	25.6874	25.3813	NaN	NaN	25.3294	25.0072	25.0469	24.6433	24.8257	24.9588	25.3034	25.1006	25.0011	protein transport [GO:0015031];regulation of ER to Golgi vesicle-mediated transport [GO:0060628];vesicle-mediated transport [GO:0016192]	COPII-coated ER to Golgi transport vesicle [GO:0030134];endoplasmic reticulum [GO:0005783];endoplasmic reticulum exit site [GO:0070971];endoplasmic reticulum membrane [GO:0005789];Golgi apparatus [GO:0005794];integral component of membrane [GO:0016021];intracellular membrane-bounded organelle [GO:0043231];nucleoplasm [GO:0005654]		GO:0005654;GO:0005783;GO:0005789;GO:0005794;GO:0015031;GO:0016021;GO:0016192;GO:0030134;GO:0043231;GO:0060628;GO:0070971
SCRIB	Q14160	Protein scribble homolog	33	30.1	174.88	196.64	3.52151	0.368038	24.5571	24.6403	24.7664	24.8486	24.9279	24.5714	24.3306	24.469	24.2928	24.359	24.258	24.5042	24.2404	activation of GTPase activity [GO:0090630];apoptotic process involved in morphogenesis [GO:0060561];astrocyte cell migration [GO:0043615];auditory receptor cell stereocilium organization [GO:0060088];cell-cell adhesion [GO:0098609];cell migration [GO:0016477];cell population proliferation [GO:0008283];cochlear nucleus development [GO:0021747];establishment of apical/basal cell polarity [GO:003508…	basolateral plasma membrane [GO:0016323];cell-cell adherens junction [GO:0005913];cell-cell contact zone [GO:0044291];cell-cell junction [GO:0005911];cell junction [GO:0030054];extracellular exosome [GO:0070062];extrinsic component of postsynaptic density membrane [GO:0099147];glutamatergic synapse [GO:0098978];lamellipodium [GO:0030027];myelin sheath abaxonal region [GO:0035748];nucleoplasm [GO:…	cadherin binding [GO:0045296];ionotropic glutamate receptor binding [GO:0035255]	GO:0001843;GO:0001921;GO:0005654;GO:0005886;GO:0005911;GO:0005913;GO:0008283;GO:0014069;GO:0016080;GO:0016323;GO:0016477;GO:0021747;GO:0030027;GO:0030054;GO:0034750;GO:0035089;GO:0035255;GO:0035748;GO:0036342;GO:0039502;GO:0039563;GO:0039564;GO:0042060;GO:0043065;GO:0043113;GO:0043615;GO:0044291;GO:0045197;GO:0045202;GO:0045296;GO:0045930;GO:0048488;GO:0050918;GO:0060088;GO:0060561;GO:0060603;GO:…
TAOK1	Q7L7X3	Serine/threonine-protein kinase TAO1	16	17.6	116.07	323.31	1.46458	0.367922	24.5063	24.8682	24.91	25.2984	25.3772	24.999	24.8048	24.1453	24.6559	24.5923	24.7764	24.8143	24.5877	activation of JUN kinase activity [GO:0007257];activation of MAPK activity [GO:0000187];activation of MAPKK activity [GO:0000186];activation of protein kinase activity [GO:0032147];cellular response to DNA damage stimulus [GO:0006974];DNA repair [GO:0006281];execution phase of apoptosis [GO:0097194];microtubule cytoskeleton organization [GO:0000226];mitotic G2 DNA damage checkpoint [GO:0007095];n…	cytoplasm [GO:0005737];cytosol [GO:0005829];extracellular exosome [GO:0070062];microtubule cytoskeleton [GO:0015630];nucleus [GO:0005634];perinuclear region of cytoplasm [GO:0048471]	alpha-tubulin binding [GO:0043014];ATP binding [GO:0005524];beta-tubulin binding [GO:0048487];kinase activity [GO:0016301];MAP kinase kinase kinase activity [GO:0004709];protein kinase activity [GO:0004672];protein serine/threonine kinase activator activity [GO:0043539];protein serine/threonine kinase activity [GO:0004674];tau protein binding [GO:0048156];tau-protein kinase activity [GO:0050321];…	GO:0000186;GO:0000187;GO:0000226;GO:0004672;GO:0004674;GO:0004709;GO:0005524;GO:0005634;GO:0005737;GO:0005829;GO:0006281;GO:0006468;GO:0006974;GO:0007026;GO:0007095;GO:0007257;GO:0015630;GO:0016301;GO:0016740;GO:0023014;GO:0031098;GO:0032147;GO:0032874;GO:0032956;GO:0043014;GO:0043539;GO:0046330;GO:0046777;GO:0048156;GO:0048471;GO:0048487;GO:0050321;GO:0051493;GO:0070050;GO:0070062;GO:0070507;GO:…
PIEZO1	Q92508	Piezo-type mechanosensitive ion channel component 1	21	12.3	286.79	201.44	1.89571	0.367811	24.4825	24.392	24.4361	24.6878	24.4544	24.4004	24.2545	24.4237	23.9734	23.8287	23.7083	24.1298	24.4356	cation transport [GO:0006812];cellular response to mechanical stimulus [GO:0071260];detection of mechanical stimulus [GO:0050982];positive regulation of cell-cell adhesion mediated by integrin [GO:0033634];positive regulation of integrin activation [GO:0033625];regulation of membrane potential [GO:0042391]	endoplasmic reticulum [GO:0005783];endoplasmic reticulum-Golgi intermediate compartment membrane [GO:0033116];endoplasmic reticulum membrane [GO:0005789];integral component of membrane [GO:0016021];lamellipodium membrane [GO:0031258];plasma membrane [GO:0005886]	cation channel activity [GO:0005261];mechanosensitive ion channel activity [GO:0008381]	GO:0005261;GO:0005783;GO:0005789;GO:0005886;GO:0006812;GO:0008381;GO:0016021;GO:0031258;GO:0033116;GO:0033625;GO:0033634;GO:0042391;GO:0050982;GO:0071260
RABEP1	Q15276	Rab GTPase-binding effector protein 1	18	26.8	99.289	323.31	1.41979	0.366836	25.142	24.9736	25.1595	25.2526	24.7411	25.1626	25.0283	24.162	24.9616	24.7829	24.5552	25.0344	24.4111	apoptotic process [GO:0006915];endocytosis [GO:0006897];Golgi to plasma membrane transport [GO:0006893];membrane fusion [GO:0061025];protein localization to ciliary membrane [GO:1903441];protein transport [GO:0015031];vesicle-mediated transport [GO:0016192]	early endosome [GO:0005769];early endosome membrane [GO:0031901];endocytic vesicle [GO:0030139];endosome [GO:0005768];intracellular membrane-bounded organelle [GO:0043231];protein-containing complex [GO:0032991];recycling endosome [GO:0055037]	growth factor activity [GO:0008083];GTPase activator activity [GO:0005096];protein domain specific binding [GO:0019904];protein homodimerization activity [GO:0042803]	GO:0005096;GO:0005768;GO:0005769;GO:0006893;GO:0006897;GO:0006915;GO:0008083;GO:0015031;GO:0016192;GO:0019904;GO:0030139;GO:0031901;GO:0032991;GO:0042803;GO:0043231;GO:0055037;GO:0061025;GO:1903441
LMO7	Q8WWI1	LIM domain only protein 7	45	32.8	192.69	323.31	1.75475	0.365576	26.7388	26.637	26.7878	26.9278	26.6887	26.4745	26.7666	26.5122	26.1351	25.9308	26.3274	26.1764	26.5562	positive regulation of transcription by RNA polymerase II [GO:0045944];post-translational protein modification [GO:0043687];protein polyubiquitination [GO:0000209];protein ubiquitination [GO:0016567];regulation of cell adhesion [GO:0030155];regulation of signaling [GO:0023051]	apical plasma membrane [GO:0016324];cell surface [GO:0009986];cytoplasm [GO:0005737];cytosol [GO:0005829];focal adhesion [GO:0005925];nuclear envelope [GO:0005635];nucleus [GO:0005634];ubiquitin ligase complex [GO:0000151]	metal ion binding [GO:0046872];ubiquitin-protein transferase activity [GO:0004842]	GO:0000151;GO:0000209;GO:0004842;GO:0005634;GO:0005635;GO:0005737;GO:0005829;GO:0005925;GO:0009986;GO:0016324;GO:0016567;GO:0023051;GO:0030155;GO:0043687;GO:0045944;GO:0046872
NECAP2	Q9NVZ3	Adaptin ear-binding coat-associated protein 2	3	19.8	28.338	98.897	2.91967	0.362133	25.5835	25.4079	25.2256	25.3821	25.2851	25.3511	24.9708	25.0647	25.1894	24.8592	24.7377	25.2069	25.0441	endocytosis [GO:0006897];protein transport [GO:0015031]	clathrin-coated pit [GO:0005905];clathrin vesicle coat [GO:0030125];intracellular [GO:0005622];plasma membrane [GO:0005886]		GO:0005622;GO:0005886;GO:0005905;GO:0006897;GO:0015031;GO:0030125
RABGEF1	Q9UJ41	Rab5 GDP/GTP exchange factor	6	13	56.89	56.098	1.68119	0.358094	23.499	23.687	23.329	23.026	23.6438	23.5162	23.0237	22.9208	23.4375	22.9289	22.8438	23.3935	23.0964	endocytosis [GO:0006897];negative regulation of inflammatory response [GO:0050728];negative regulation of interleukin-6 secretion [GO:1900165];negative regulation of Kit signaling pathway [GO:1900235];negative regulation of leukocyte migration [GO:0002686];negative regulation of mast cell degranulation [GO:0043305];negative regulation of protein phosphorylation [GO:0001933];negative regulation of…	cytosol [GO:0005829];early endosome [GO:0005769];early endosome membrane [GO:0031901];nucleolus [GO:0005730];recycling endosome [GO:0055037]	DNA binding [GO:0003677];Rab GTPase binding [GO:0017137];Rab guanyl-nucleotide exchange factor activity [GO:0017112];ubiquitin protein ligase activity [GO:0061630];zinc ion binding [GO:0008270]	GO:0001933;GO:0002686;GO:0003677;GO:0005730;GO:0005769;GO:0005829;GO:0006612;GO:0006897;GO:0008270;GO:0017112;GO:0017137;GO:0031901;GO:0043305;GO:0046580;GO:0048261;GO:0050728;GO:0055037;GO:0060368;GO:0061630;GO:1900165;GO:1900235
NCK1	P16333	Cytoplasmic protein NCK1	8	22.8	42.864	12.924	2.7939	0.358071	24.9081	25.3845	25.0416	25.2561	25.3317	25.2636	24.7411	24.7322	24.7654	25.0524	24.8784	24.7502	24.9569	actin filament organization [GO:0007015];ephrin receptor signaling pathway [GO:0048013];Fc-gamma receptor signaling pathway involved in phagocytosis [GO:0038096];lamellipodium assembly [GO:0030032];negative regulation of cell death [GO:0060548];negative regulation of endoplasmic reticulum stress-induced eIF2 alpha phosphorylation [GO:1903912];negative regulation of insulin receptor signaling path…	cell-cell junction [GO:0005911];cytoplasm [GO:0005737];cytosol [GO:0005829];endoplasmic reticulum [GO:0005783];nucleus [GO:0005634];plasma membrane [GO:0005886];protein phosphatase type 1 complex [GO:0000164];ribosome [GO:0005840];vesicle membrane [GO:0012506]	cadherin binding [GO:0045296];cytoskeletal adaptor activity [GO:0008093];ephrin receptor binding [GO:0046875];eukaryotic initiation factor eIF2 binding [GO:0071074];protein binding, bridging [GO:0030674];protein domain specific binding [GO:0019904];protein kinase inhibitor activity [GO:0004860];receptor signaling complex adaptor activity [GO:0030159];receptor tyrosine kinase binding [GO:0030971];…	GO:0000164;GO:0004860;GO:0005070;GO:0005102;GO:0005634;GO:0005737;GO:0005783;GO:0005829;GO:0005840;GO:0005886;GO:0005911;GO:0006930;GO:0007015;GO:0007172;GO:0008093;GO:0010976;GO:0012506;GO:0019904;GO:0030032;GO:0030159;GO:0030334;GO:0030674;GO:0030838;GO:0030971;GO:0033137;GO:0036493;GO:0038096;GO:0042102;GO:0042110;GO:0045296;GO:0045944;GO:0046627;GO:0046875;GO:0048010;GO:0048013;GO:0050852;GO:…
DLG5	Q8TDM6	Disks large homolog 5	15	10.3	213.87	19.831	1.42694	0.357741	NaN	24.8236	24.9185	25.1678	24.7403	24.6111	24.9792	24.5046	24.3881	24.6565	24.3538	24.51	24.0693	apical protein localization [GO:0045176];cell-cell adhesion [GO:0098609];epithelial to mesenchymal transition [GO:0001837];epithelial tube branching involved in lung morphogenesis [GO:0060441];establishment or maintenance of epithelial cell apical/basal polarity [GO:0045197];intracellular signal transduction [GO:0035556];maintenance of cell polarity [GO:0030011];metanephric collecting duct develo…	cell-cell adherens junction [GO:0005913];cell junction [GO:0030054];ciliary basal body [GO:0036064];cytoplasm [GO:0005737];plasma membrane [GO:0005886];postsynaptic density [GO:0014069];postsynaptic membrane [GO:0045211]	beta-catenin binding [GO:0008013];cytoskeletal protein binding [GO:0008092];receptor signaling complex adaptor activity [GO:0030159]	GO:0001837;GO:0005737;GO:0005886;GO:0005913;GO:0007165;GO:0008013;GO:0008092;GO:0008285;GO:0014069;GO:0030011;GO:0030054;GO:0030159;GO:0030336;GO:0030859;GO:0030901;GO:0035331;GO:0035332;GO:0035556;GO:0036064;GO:0042130;GO:0042981;GO:0045176;GO:0045186;GO:0045197;GO:0045211;GO:0045880;GO:0051965;GO:0060441;GO:0060999;GO:0065003;GO:0071896;GO:0072205;GO:0098609
IGF2BP2	Q9Y6M1	Insulin-like growth factor 2 mRNA-binding protein 2	14	28	66.121	75.966	2.54191	0.355897	27.2017	27.2426	27.2162	27.2867	27.1834	27.0981	26.7822	27.0612	26.9702	26.446	26.731	27.067	26.8847	anatomical structure morphogenesis [GO:0009653];mRNA transport [GO:0051028];negative regulation of translation [GO:0017148];regulation of cytokine biosynthetic process [GO:0042035];regulation of mRNA stability [GO:0043488]	cytoplasm [GO:0005737];cytoskeleton [GO:0005856];cytosol [GO:0005829];nucleus [GO:0005634]	mRNA 3'-UTR binding [GO:0003730];mRNA 5'-UTR binding [GO:0048027];RNA binding [GO:0003723];translation regulator activity [GO:0045182]	GO:0003723;GO:0003730;GO:0005634;GO:0005737;GO:0005829;GO:0005856;GO:0009653;GO:0017148;GO:0042035;GO:0043488;GO:0045182;GO:0048027;GO:0051028
VPS52	Q8N1B4	Vacuolar protein sorting-associated protein 52 homolog	10	19.1	82.22	47.732	2.43401	0.354298	NaN	24.4458	24.4918	24.2212	24.1138	24.1231	24.0684	23.7634	24.0238	24.0059	23.7919	24.0664	23.7538	ectodermal cell differentiation [GO:0010668];embryonic ectodermal digestive tract development [GO:0048611];endocytic recycling [GO:0032456];Golgi to vacuole transport [GO:0006896];lysosomal transport [GO:0007041];protein transport [GO:0015031];retrograde transport, endosome to Golgi [GO:0042147]	cytosol [GO:0005829];EARP complex [GO:1990745];endosome membrane [GO:0010008];GARP complex [GO:0000938];Golgi apparatus [GO:0005794];membrane [GO:0016020];perinuclear region of cytoplasm [GO:0048471];recycling endosome [GO:0055037];trans-Golgi network membrane [GO:0032588]	Rab GTPase binding [GO:0017137];syntaxin binding [GO:0019905]	GO:0000938;GO:0005794;GO:0005829;GO:0006896;GO:0007041;GO:0010008;GO:0010668;GO:0015031;GO:0016020;GO:0017137;GO:0019905;GO:0032456;GO:0032588;GO:0042147;GO:0048471;GO:0048611;GO:0055037;GO:1990745
RPTOR	Q8N122	Regulatory-associated protein of mTOR	10	10.9	149.04	164.31	2.65576	0.353797	23.8658	24.0694	24.0873	23.8023	23.7419	23.5998	23.4408	23.4864	23.4986	23.6816	23.2802	23.6278	23.5356	cell cycle arrest [GO:0007050];cellular response to amino acid stimulus [GO:0071230];cellular response to leucine [GO:0071233];cellular response to nutrient levels [GO:0031669];cellular response to starvation [GO:0009267];positive regulation of cell growth [GO:0030307];positive regulation of endothelial cell proliferation [GO:0001938];positive regulation of G1/S transition of mitotic cell cycle […	cytoplasm [GO:0005737];cytoplasmic stress granule [GO:0010494];cytosol [GO:0005829];dendrite [GO:0030425];lysosomal membrane [GO:0005765];lysosome [GO:0005764];neuronal cell body [GO:0043025];nucleoplasm [GO:0005654];TORC1 complex [GO:0031931]	14-3-3 protein binding [GO:0071889];protein binding, bridging [GO:0030674];protein-containing complex binding [GO:0044877];protein kinase activator activity [GO:0030295];protein kinase binding [GO:0019901];protein serine/threonine kinase inhibitor activity [GO:0030291];RNA polymerase III type 1 promoter DNA binding [GO:0001030];RNA polymerase III type 2 promoter DNA binding [GO:0001031];RNA polym…	GO:0001030;GO:0001031;GO:0001032;GO:0001156;GO:0001558;GO:0001938;GO:0005654;GO:0005737;GO:0005764;GO:0005765;GO:0005829;GO:0007050;GO:0008361;GO:0009267;GO:0010494;GO:0010800;GO:0016032;GO:0016241;GO:0019901;GO:0030291;GO:0030295;GO:0030307;GO:0030425;GO:0030674;GO:0031669;GO:0031929;GO:0031931;GO:0032008;GO:0033138;GO:0038202;GO:0043025;GO:0044877;GO:0045945;GO:0071230;GO:0071233;GO:0071889;GO:…
	P0DPI2;A0A0B4J2D5		5	25.4	28.17	92.304	0.0812122	0.0521786	NaN	26.3897	25.717	26.8034	26.0827	26.2186	26.1215	26.7604	NaN	26.1053	25.744	26.5078	25.9016		mitochondrion [GO:0005739];mitochondrion [GO:0005739]		GO:0005739;GO:0005739
UBA6	A0AVT1	Ubiquitin-like modifier-activating enzyme 6	17	20.5	117.97	204.92	0.457573	0.111633	26.3871	26.3265	26.3067	26.1501	26.0459	26.2079	26.4219	25.6616	26.1804	26.3411	25.9994	26.2186	26.0571	amygdala development [GO:0021764];dendritic spine development [GO:0060996];hippocampus development [GO:0021766];learning [GO:0007612];locomotory behavior [GO:0007626];protein modification by small protein conjugation [GO:0032446];protein ubiquitination [GO:0016567];ubiquitin-dependent protein catabolic process [GO:0006511]	cytoplasm [GO:0005737];cytosol [GO:0005829]	ATP binding [GO:0005524];FAT10 activating enzyme activity [GO:0019780];ubiquitin activating enzyme activity [GO:0004839]	GO:0004839;GO:0005524;GO:0005737;GO:0005829;GO:0006511;GO:0007612;GO:0007626;GO:0016567;GO:0019780;GO:0021764;GO:0021766;GO:0032446;GO:0060996
CHUK	O15111	Inhibitor of nuclear factor kappa-B kinase subunit alpha	7	12.3	84.639	24.711	1.57323	0.353464	23.1743	23.7292	23.7506	23.6972	23.2383	NaN	23.4584	23.0794	23.359	23.2351	22.9684	23.0386	23.0123	anatomical structure morphogenesis [GO:0009653];antigen processing and presentation of exogenous peptide antigen via MHC class I, TAP-dependent [GO:0002479];cellular response to cadmium ion [GO:0071276];cellular response to reactive oxygen species [GO:0034614];cellular response to tumor necrosis factor [GO:0071356];cellular response to virus [GO:0098586];Fc-epsilon receptor signaling pathway [GO:…	CD40 receptor complex [GO:0035631];cytoplasm [GO:0005737];cytoplasmic side of plasma membrane [GO:0009898];cytosol [GO:0005829];IkappaB kinase complex [GO:0008385];intracellular membrane-bounded organelle [GO:0043231];nucleoplasm [GO:0005654]	ATP binding [GO:0005524];IkappaB kinase activity [GO:0008384];protein heterodimerization activity [GO:0046982];protein homodimerization activity [GO:0042803];protein kinase activity [GO:0004672];protein serine/threonine kinase activity [GO:0004674];scaffold protein binding [GO:0097110]	GO:0002223;GO:0002479;GO:0002756;GO:0003009;GO:0004672;GO:0004674;GO:0005524;GO:0005654;GO:0005737;GO:0005829;GO:0006468;GO:0006954;GO:0006955;GO:0007249;GO:0007252;GO:0007266;GO:0008384;GO:0008385;GO:0009615;GO:0009636;GO:0009653;GO:0009898;GO:0010034;GO:0010803;GO:0018105;GO:0032088;GO:0032496;GO:0033194;GO:0033209;GO:0034614;GO:0035631;GO:0035666;GO:0038061;GO:0038095;GO:0042493;GO:0042803;GO:…
SLK	Q9H2G2	STE20-like serine/threonine-protein kinase	32	32.2	142.69	323.31	1.59979	0.35336	26.5145	26.7376	26.6262	26.866	26.9893	26.651	26.6392	25.9123	26.5696	26.4653	26.1823	26.6988	26.1743	activation of protein kinase activity [GO:0032147];apoptotic process [GO:0006915];cytoplasmic microtubule organization [GO:0031122];protein autophosphorylation [GO:0046777];regulation of apoptotic process [GO:0042981];regulation of cell migration [GO:0030334];regulation of focal adhesion assembly [GO:0051893];signal transduction by protein phosphorylation [GO:0023014];stress-activated protein kin…	cell leading edge [GO:0031252];cytoplasm [GO:0005737];extracellular exosome [GO:0070062];perinuclear region of cytoplasm [GO:0048471]	ATP binding [GO:0005524];cadherin binding [GO:0045296];identical protein binding [GO:0042802];protein homodimerization activity [GO:0042803];protein serine/threonine kinase activity [GO:0004674]	GO:0004674;GO:0005524;GO:0005737;GO:0006915;GO:0023014;GO:0030334;GO:0031098;GO:0031122;GO:0031252;GO:0032147;GO:0042802;GO:0042803;GO:0042981;GO:0045296;GO:0046777;GO:0048471;GO:0051893;GO:0070062
VWA8	A3KMH1	von Willebrand factor A domain-containing protein 8	25	19	214.82	64.385	0.503557	0.449243	23.6529	23.1031	23.6888	24.959	24.9004	25.1095	24.4456	24.2247	23.3229	NaN	23.8644	23.9905	22.8702		mitochondrion [GO:0005739];peroxisome [GO:0005777]	ATPase activity [GO:0016887];ATP binding [GO:0005524]	GO:0005524;GO:0005739;GO:0005777;GO:0016887
HSD17B4	P51659	Peroxisomal multifunctional enzyme type 2;(3R)-hydroxyacyl-CoA dehydrogenase;Enoyl-CoA hydratase 2	24	40.5	79.685	306.72	3.32251	0.352765	28.1374	27.9872	28.092	28.2344	28.2255	27.9692	27.5449	27.5949	27.7745	27.9573	27.8221	27.7722	27.8182	alpha-linolenic acid metabolic process [GO:0036109];androgen metabolic process [GO:0008209];bile acid biosynthetic process [GO:0006699];estrogen metabolic process [GO:0008210];fatty acid beta-oxidation [GO:0006635];fatty acid beta-oxidation using acyl-CoA oxidase [GO:0033540];medium-chain fatty-acyl-CoA metabolic process [GO:0036112];osteoblast differentiation [GO:0001649];protein targeting to pe…	cytosol [GO:0005829];membrane [GO:0016020];peroxisomal matrix [GO:0005782];peroxisomal membrane [GO:0005778];peroxisome [GO:0005777]	17-beta-hydroxysteroid dehydrogenase (NAD+) activity [GO:0044594];3alpha,7alpha,12alpha-trihydroxy-5beta-cholest-24-enoyl-CoA hydratase activity [GO:0033989];3-hydroxyacyl-CoA dehydrogenase activity [GO:0003857];isomerase activity [GO:0016853];long-chain-enoyl-CoA hydratase activity [GO:0016508];protein homodimerization activity [GO:0042803]	GO:0000038;GO:0001649;GO:0003857;GO:0005777;GO:0005778;GO:0005782;GO:0005829;GO:0006625;GO:0006635;GO:0006699;GO:0008209;GO:0008210;GO:0016020;GO:0016508;GO:0016853;GO:0033540;GO:0033989;GO:0036109;GO:0036111;GO:0036112;GO:0042803;GO:0044594;GO:0060009
CNOT1	A5YKK6	CCR4-NOT transcription complex subunit 1	33	17.6	266.94	173.05	0.38397	-0.0802998	24.9104	24.8861	24.9575	25.1731	24.8656	24.9238	24.9809	24.9311	25.0127	25.034	25.3394	25.2285	24.7047	DNA damage response, signal transduction by p53 class mediator resulting in cell cycle arrest [GO:0006977];gene silencing by miRNA [GO:0035195];multicellular organism development [GO:0007275];negative regulation of intracellular estrogen receptor signaling pathway [GO:0033147];negative regulation of retinoic acid receptor signaling pathway [GO:0048387];negative regulation of transcription by RNA …	CCR4-NOT complex [GO:0030014];CCR4-NOT core complex [GO:0030015];cytosol [GO:0005829];extracellular space [GO:0005615];membrane [GO:0016020];nucleus [GO:0005634];P-body [GO:0000932];peroxisomal membrane [GO:0005778]	armadillo repeat domain binding [GO:0070016];estrogen receptor binding [GO:0030331];molecular adaptor activity [GO:0060090];protein domain specific binding [GO:0019904];retinoic acid receptor binding [GO:0042974];RNA binding [GO:0003723]	GO:0000122;GO:0000289;GO:0000932;GO:0003723;GO:0005615;GO:0005634;GO:0005778;GO:0005829;GO:0006977;GO:0007275;GO:0010606;GO:0016020;GO:0017148;GO:0019904;GO:0030014;GO:0030015;GO:0030331;GO:0033147;GO:0035195;GO:0042974;GO:0048387;GO:0060090;GO:0060213;GO:0061014;GO:0070016;GO:0090503;GO:1900153;GO:2000036
PGP	A6NDG6	Phosphoglycolate phosphatase	4	15	34.006	56.514	0.202226	0.0647933	25.023	25.3114	25.1052	25.3818	25.127	24.944	25.3439	25.026	24.6687	25.3664	NaN	25.185	24.9135	dephosphorylation [GO:0016311];glycerol biosynthetic process [GO:0006114];glycerophospholipid metabolic process [GO:0006650];negative regulation of gluconeogenesis [GO:0045721];peptidyl-tyrosine dephosphorylation [GO:0035335]	cytoplasm [GO:0005737]	glycerol-1-phosphatase activity [GO:0000121];glycerol-3-phosphatase activity [GO:0043136];magnesium ion binding [GO:0000287];nucleotide phosphatase activity, acting on free nucleotides [GO:0098519];phosphatase activity [GO:0016791];phosphoglycolate phosphatase activity [GO:0008967];protein tyrosine phosphatase activity [GO:0004725]	GO:0000121;GO:0000287;GO:0004725;GO:0005737;GO:0006114;GO:0006650;GO:0008967;GO:0016311;GO:0016791;GO:0035335;GO:0043136;GO:0045721;GO:0098519
GATSL2	A6NHX0	GATS-like protein 2	2	12.5	36.056	28.992	0.343306	0.164846	24.2531	23.4584	24.1993	NaN	24.1033	23.7786	24.544	23.3408	23.7043	23.6757	23.9681	23.6676	23.655	cellular response to L-arginine [GO:1903577];negative regulation of TORC1 signaling [GO:1904262];regulation of intracellular signal transduction [GO:1902531]	cytosol [GO:0005829]	identical protein binding [GO:0042802]	GO:0005829;GO:0042802;GO:1902531;GO:1903577;GO:1904262
EIF3C;EIF3CL	Q99613;B5ME19	Eukaryotic translation initiation factor 3 subunit C;Eukaryotic translation initiation factor 3 subunit C-like protein	18	20.4	105.34	323.31	0.434762	0.106405	27.4615	27.5189	27.6331	27.6857	27.7818	27.5089	27.6639	27.0957	27.5584	27.5353	27.7218	27.6869	27.1816	formation of cytoplasmic translation initiation complex [GO:0001732];translational initiation [GO:0006413];formation of cytoplasmic translation initiation complex [GO:0001732];positive regulation of mRNA binding [GO:1902416];positive regulation of translation [GO:0045727];translational initiation [GO:0006413]	eukaryotic 43S preinitiation complex [GO:0016282];eukaryotic 48S preinitiation complex [GO:0033290];eukaryotic translation initiation factor 3 complex [GO:0005852];cytosol [GO:0005829];eukaryotic 43S preinitiation complex [GO:0016282];eukaryotic 48S preinitiation complex [GO:0033290];eukaryotic translation initiation factor 3 complex [GO:0005852]	translation initiation factor activity [GO:0003743];translation initiation factor binding [GO:0031369];RNA binding [GO:0003723];translation initiation factor activity [GO:0003743];translation initiation factor binding [GO:0031369]	GO:0001732;GO:0003743;GO:0005852;GO:0006413;GO:0016282;GO:0031369;GO:0033290;GO:0001732;GO:0003723;GO:0003743;GO:0005829;GO:0005852;GO:0006413;GO:0016282;GO:0031369;GO:0033290;GO:0045727;GO:1902416
NACA	Q13765;E9PAV3	Nascent polypeptide-associated complex subunit alpha;Nascent polypeptide-associated complex subunit alpha, muscle-specific form	4	26.5	23.384	261.39	0.604231	-0.577807	29.7433	29.1548	29.0305	28.2654	28.2223	29.3353	27.4241	29.8095	29.9783	29.9449	30.5991	29.7686	29.2305	cardiac ventricle development [GO:0003231];heart trabecula morphogenesis [GO:0061384];negative regulation of striated muscle cell apoptotic process [GO:0010664];negative regulation of transcription from RNA polymerase II promoter involved in heart development [GO:1901227];positive regulation of cell proliferation involved in heart morphogenesis [GO:2000138];positive regulation of skeletal muscle …	cytoplasm [GO:0005737];extracellular exosome [GO:0070062];nascent polypeptide-associated complex [GO:0005854];nucleus [GO:0005634];nascent polypeptide-associated complex [GO:0005854];nucleus [GO:0005634]	DNA binding [GO:0003677];transcription coactivator activity [GO:0003713];DNA binding [GO:0003677]	GO:0003231;GO:0003677;GO:0003713;GO:0005634;GO:0005737;GO:0005854;GO:0006412;GO:0010664;GO:0015031;GO:0043403;GO:0048633;GO:0048742;GO:0061384;GO:0070062;GO:1901227;GO:1901228;GO:2000138;GO:0003677;GO:0005634;GO:0005854
AGPS	O00116	Alkyldihydroxyacetonephosphate synthase, peroxisomal	12	24.6	72.911	323.31	0.963208	-0.199041	25.4688	25.4702	25.4651	25.6523	25.6166	25.5722	25.7712	25.3678	25.86	25.8885	26.0281	25.9011	25.3626	ether lipid biosynthetic process [GO:0008611];lipid biosynthetic process [GO:0008610];protein targeting to peroxisome [GO:0006625]	cytosol [GO:0005829];membrane [GO:0016020];mitochondrion [GO:0005739];nucleolus [GO:0005730];peroxisomal matrix [GO:0005782];peroxisomal membrane [GO:0005778];peroxisome [GO:0005777]	alkylglycerone-phosphate synthase activity [GO:0008609];FAD binding [GO:0071949];oxidoreductase activity [GO:0016491]	GO:0005730;GO:0005739;GO:0005777;GO:0005778;GO:0005782;GO:0005829;GO:0006625;GO:0008609;GO:0008610;GO:0008611;GO:0016020;GO:0016491;GO:0071949
PPP1R18	Q6NYC8	Phostensin	12	31.2	67.942	268.29	1.50794	0.351364	25.4785	25.5879	25.5018	26.0614	25.9267	25.9076	25.3345	25.1002	25.4544	25.5128	25.4634	25.8204	25.0627		cytoplasm [GO:0005737];cytoskeleton [GO:0005856]	actin binding [GO:0003779];phosphatase binding [GO:0019902]	GO:0003779;GO:0005737;GO:0005856;GO:0019902
ACOT7	O00154	Cytosolic acyl coenzyme A thioester hydrolase	9	31.6	41.796	54.567	0.675803	-0.212876	25.2048	25.0135	24.9368	24.8095	25.4794	25.4902	25.2404	25.7023	24.8216	25.3037	25.4715	25.6145	25.426	acyl-CoA metabolic process [GO:0006637];coenzyme A biosynthetic process [GO:0015937];long-chain fatty-acyl-CoA catabolic process [GO:0036116];medium-chain fatty acid biosynthetic process [GO:0051792];medium-chain fatty-acyl-CoA catabolic process [GO:0036114];palmitic acid biosynthetic process [GO:1900535]	cytosol [GO:0005829];extracellular exosome [GO:0070062];mitochondrion [GO:0005739];nucleoplasm [GO:0005654]	acyl-CoA hydrolase activity [GO:0047617];carboxylic ester hydrolase activity [GO:0052689];fatty-acyl-CoA binding [GO:0000062];long-chain fatty acyl-CoA binding [GO:0036042];myristoyl-CoA hydrolase activity [GO:0102991];palmitoyl-CoA hydrolase activity [GO:0016290];protein homodimerization activity [GO:0042803]	GO:0000062;GO:0005654;GO:0005739;GO:0005829;GO:0006637;GO:0015937;GO:0016290;GO:0036042;GO:0036114;GO:0036116;GO:0042803;GO:0047617;GO:0051792;GO:0052689;GO:0070062;GO:0102991;GO:1900535
[truncated: 2,216 more rows]
